# Supplementary material
Source: publisher site journal article supplement (https://www.dovepress.com/article/336062)
Supplement: Supplementary file 1 [file get_supplementary_file.php]

## **Supplementary materials**

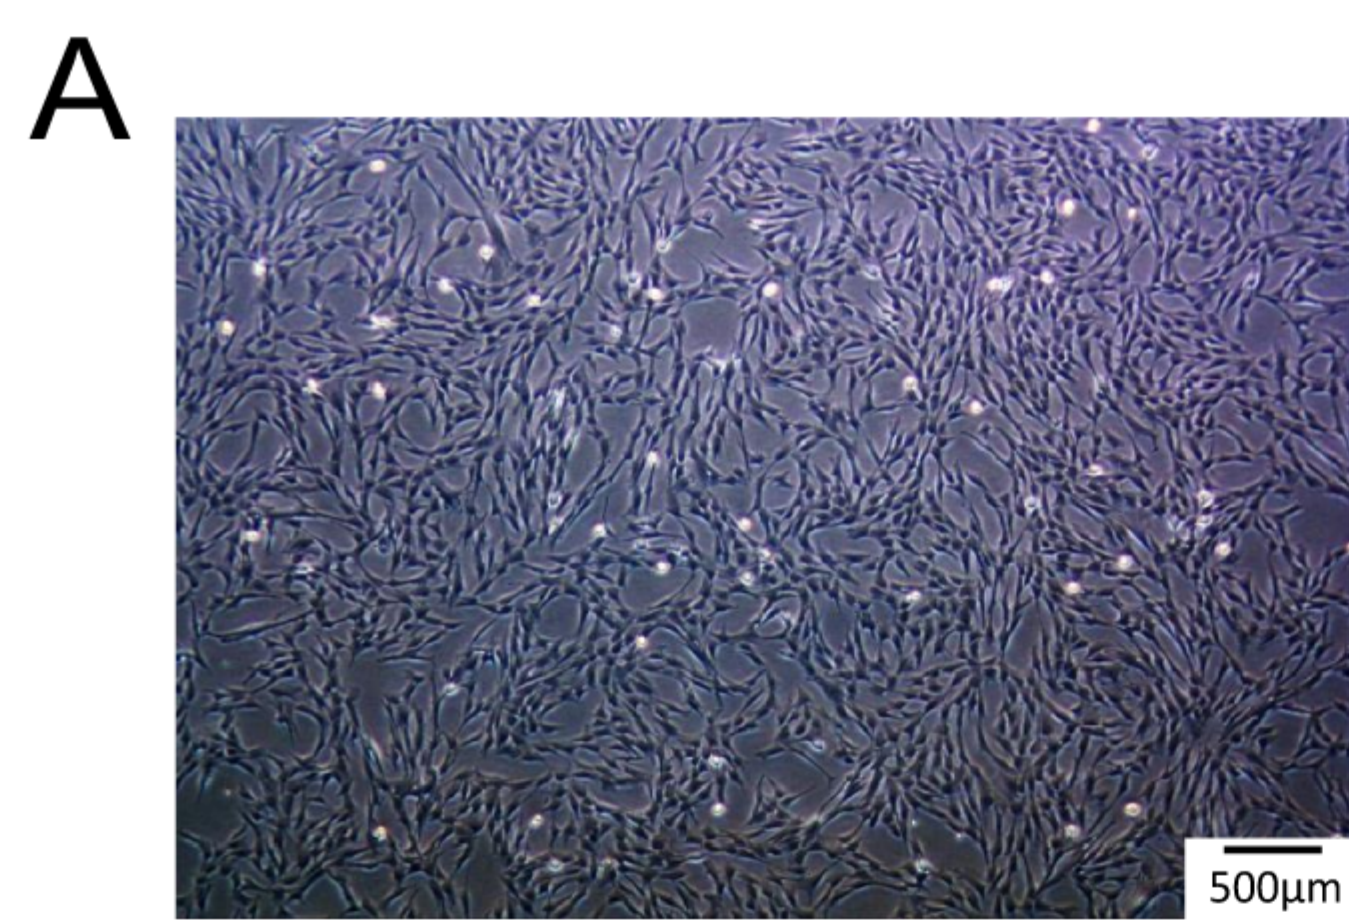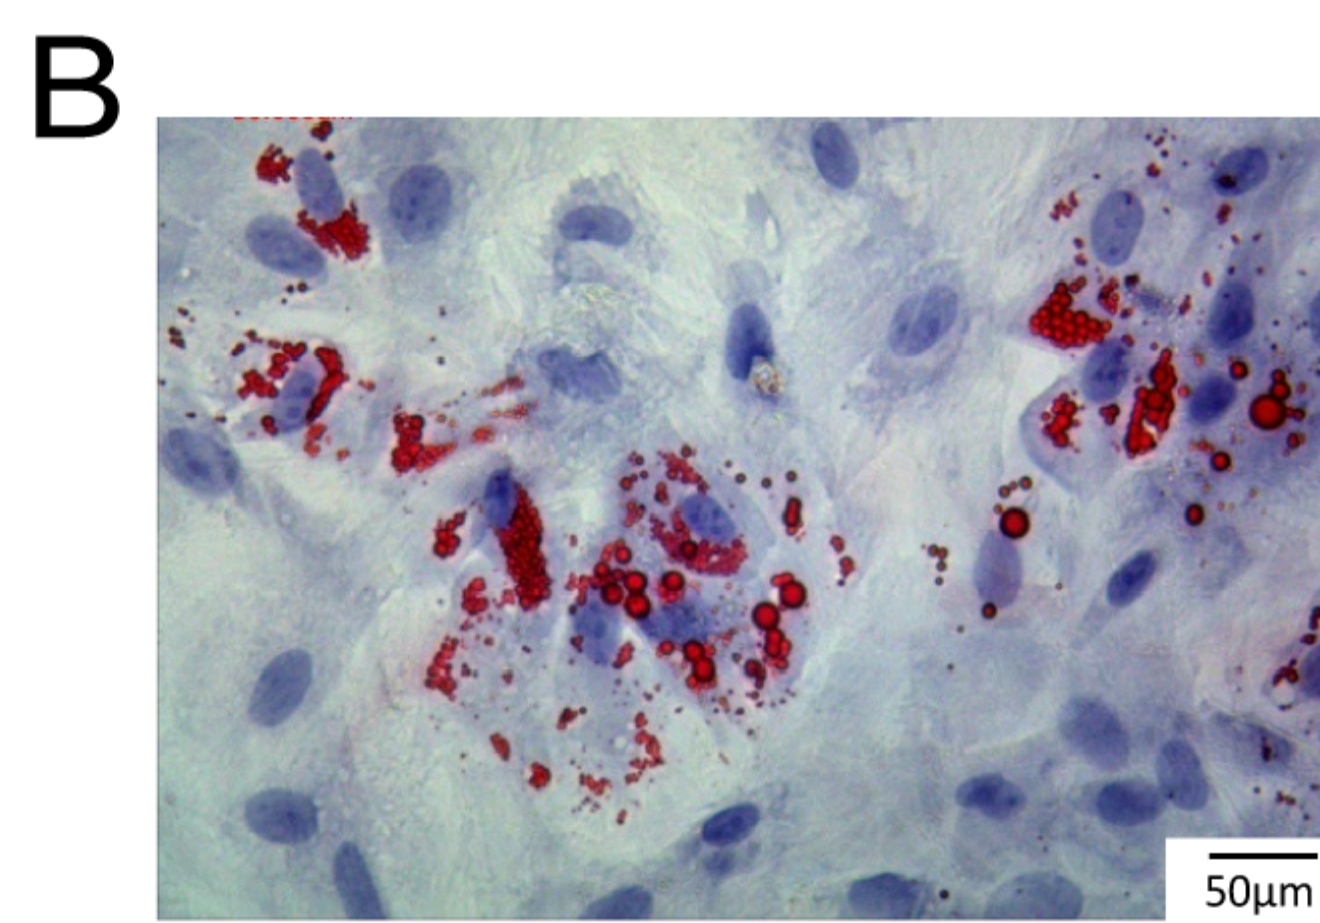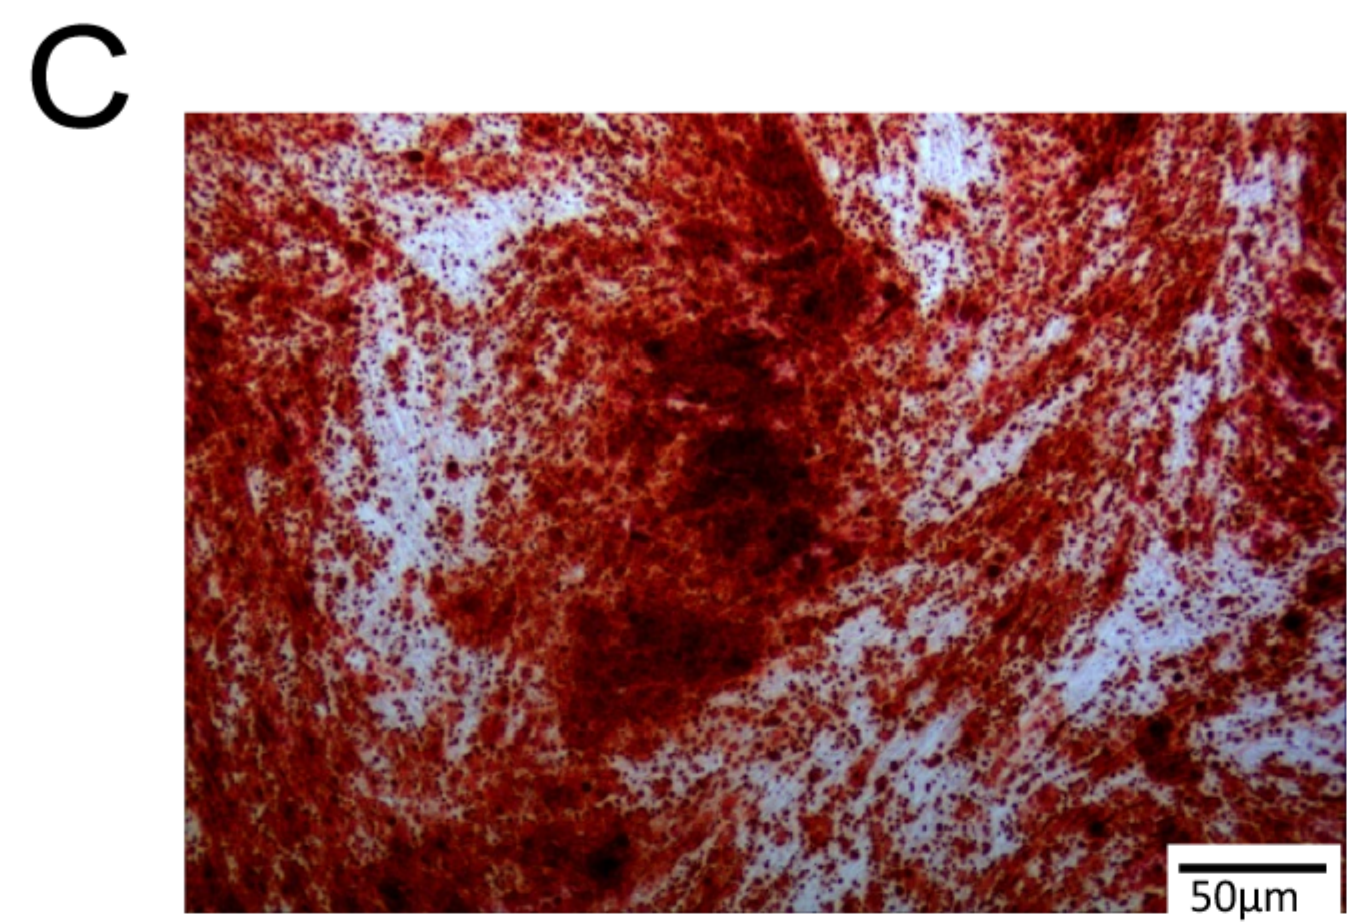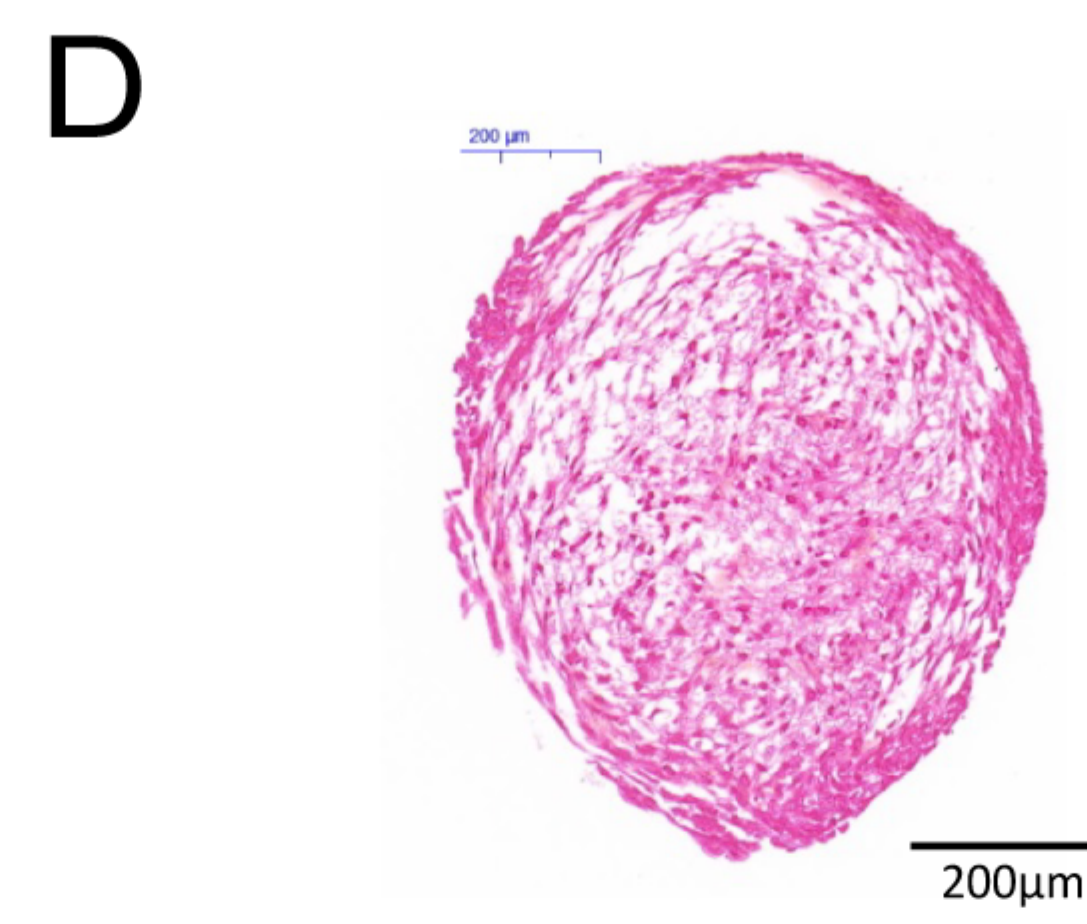

**Supplementary Figure 1.**  
 Characterization of hUC-MSCs.  
**(A)** Under a light microscope, hUC-MSCs were evenly arranged in short fusiform style (scale bar = 500  $\mu\text{m}$ ).  
**(B)** hUC-MSCs were induced to differentiate into adipocytes. With the help of oil red staining, large and red round lipid droplets appeared in the cytoplasm (scale bar = 50  $\mu\text{m}$ ).  
**(C)** hUC-MSCs were induced to differentiate into osteoblasts. (scale bar = 50  $\mu\text{m}$ ).  
**(D)** hUC-MSCs were induced to differentiate into cartilage. Under the effects of safranin staining, the cartilage matrix showed uniform red staining.  
**(E-F)** Flow cytometry showed negative expression of CD34, CD45, and HLA-DR, and positive expression of CD73, CD90, and CD105

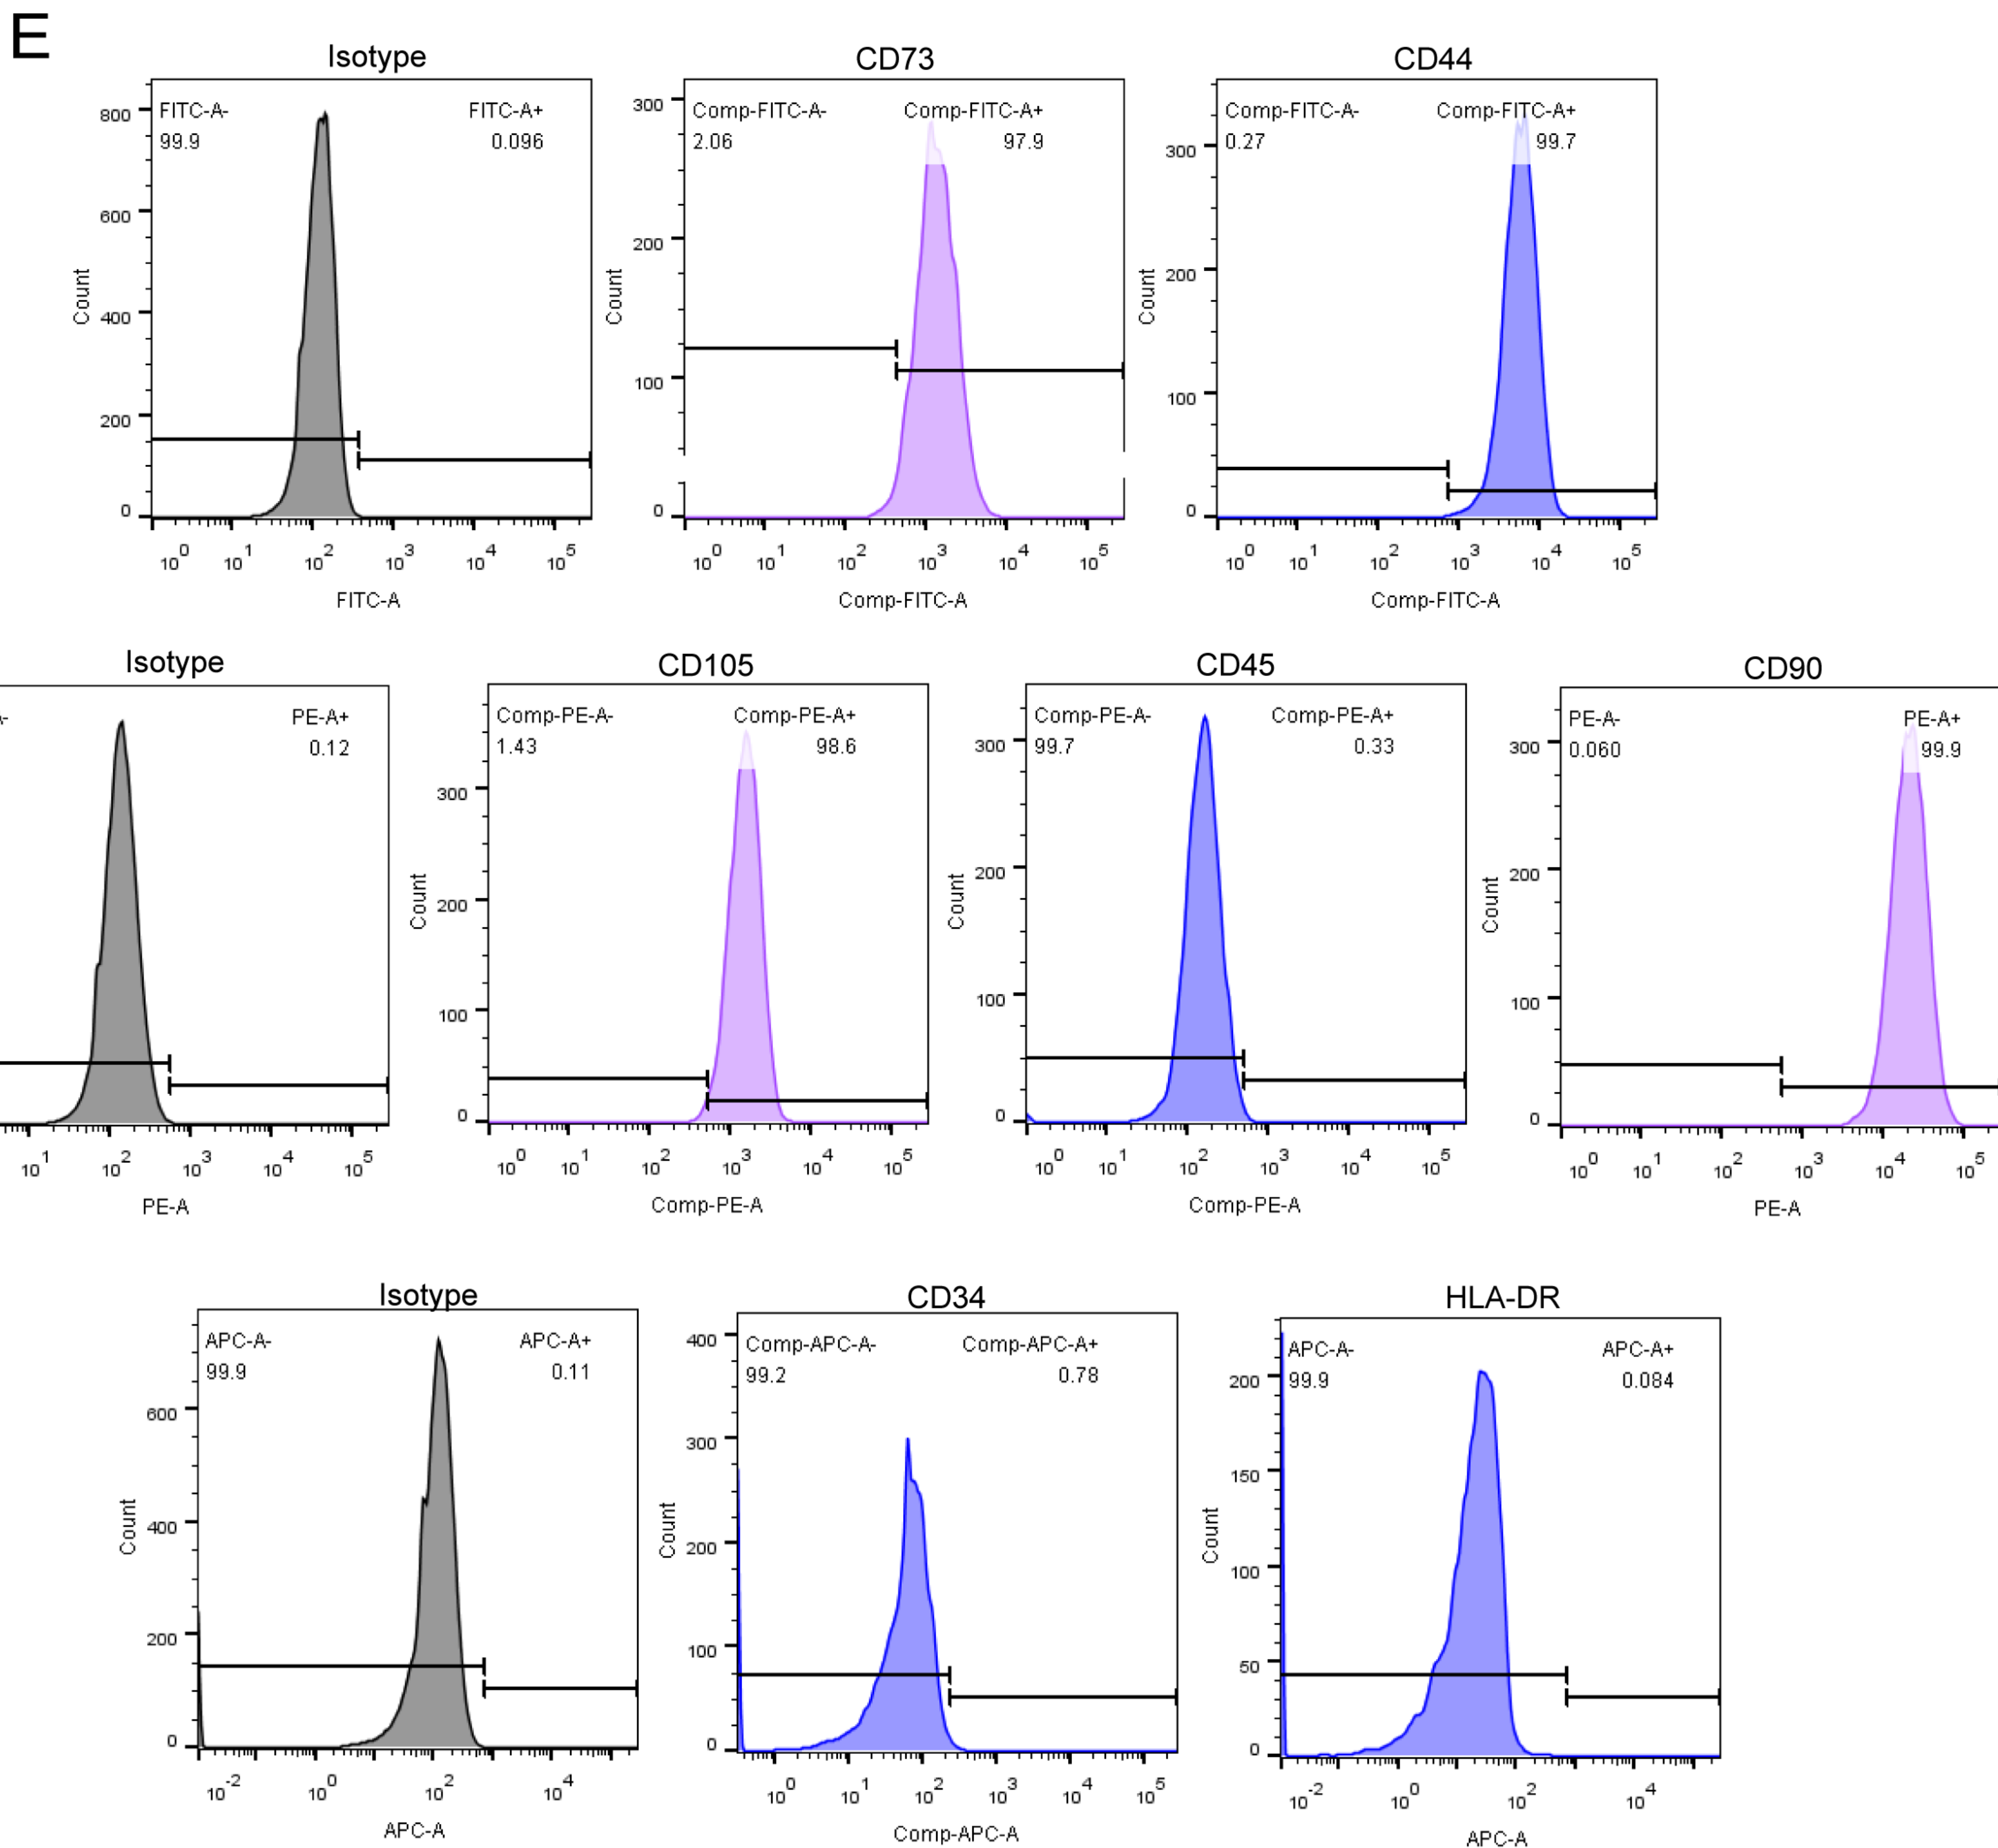

**A**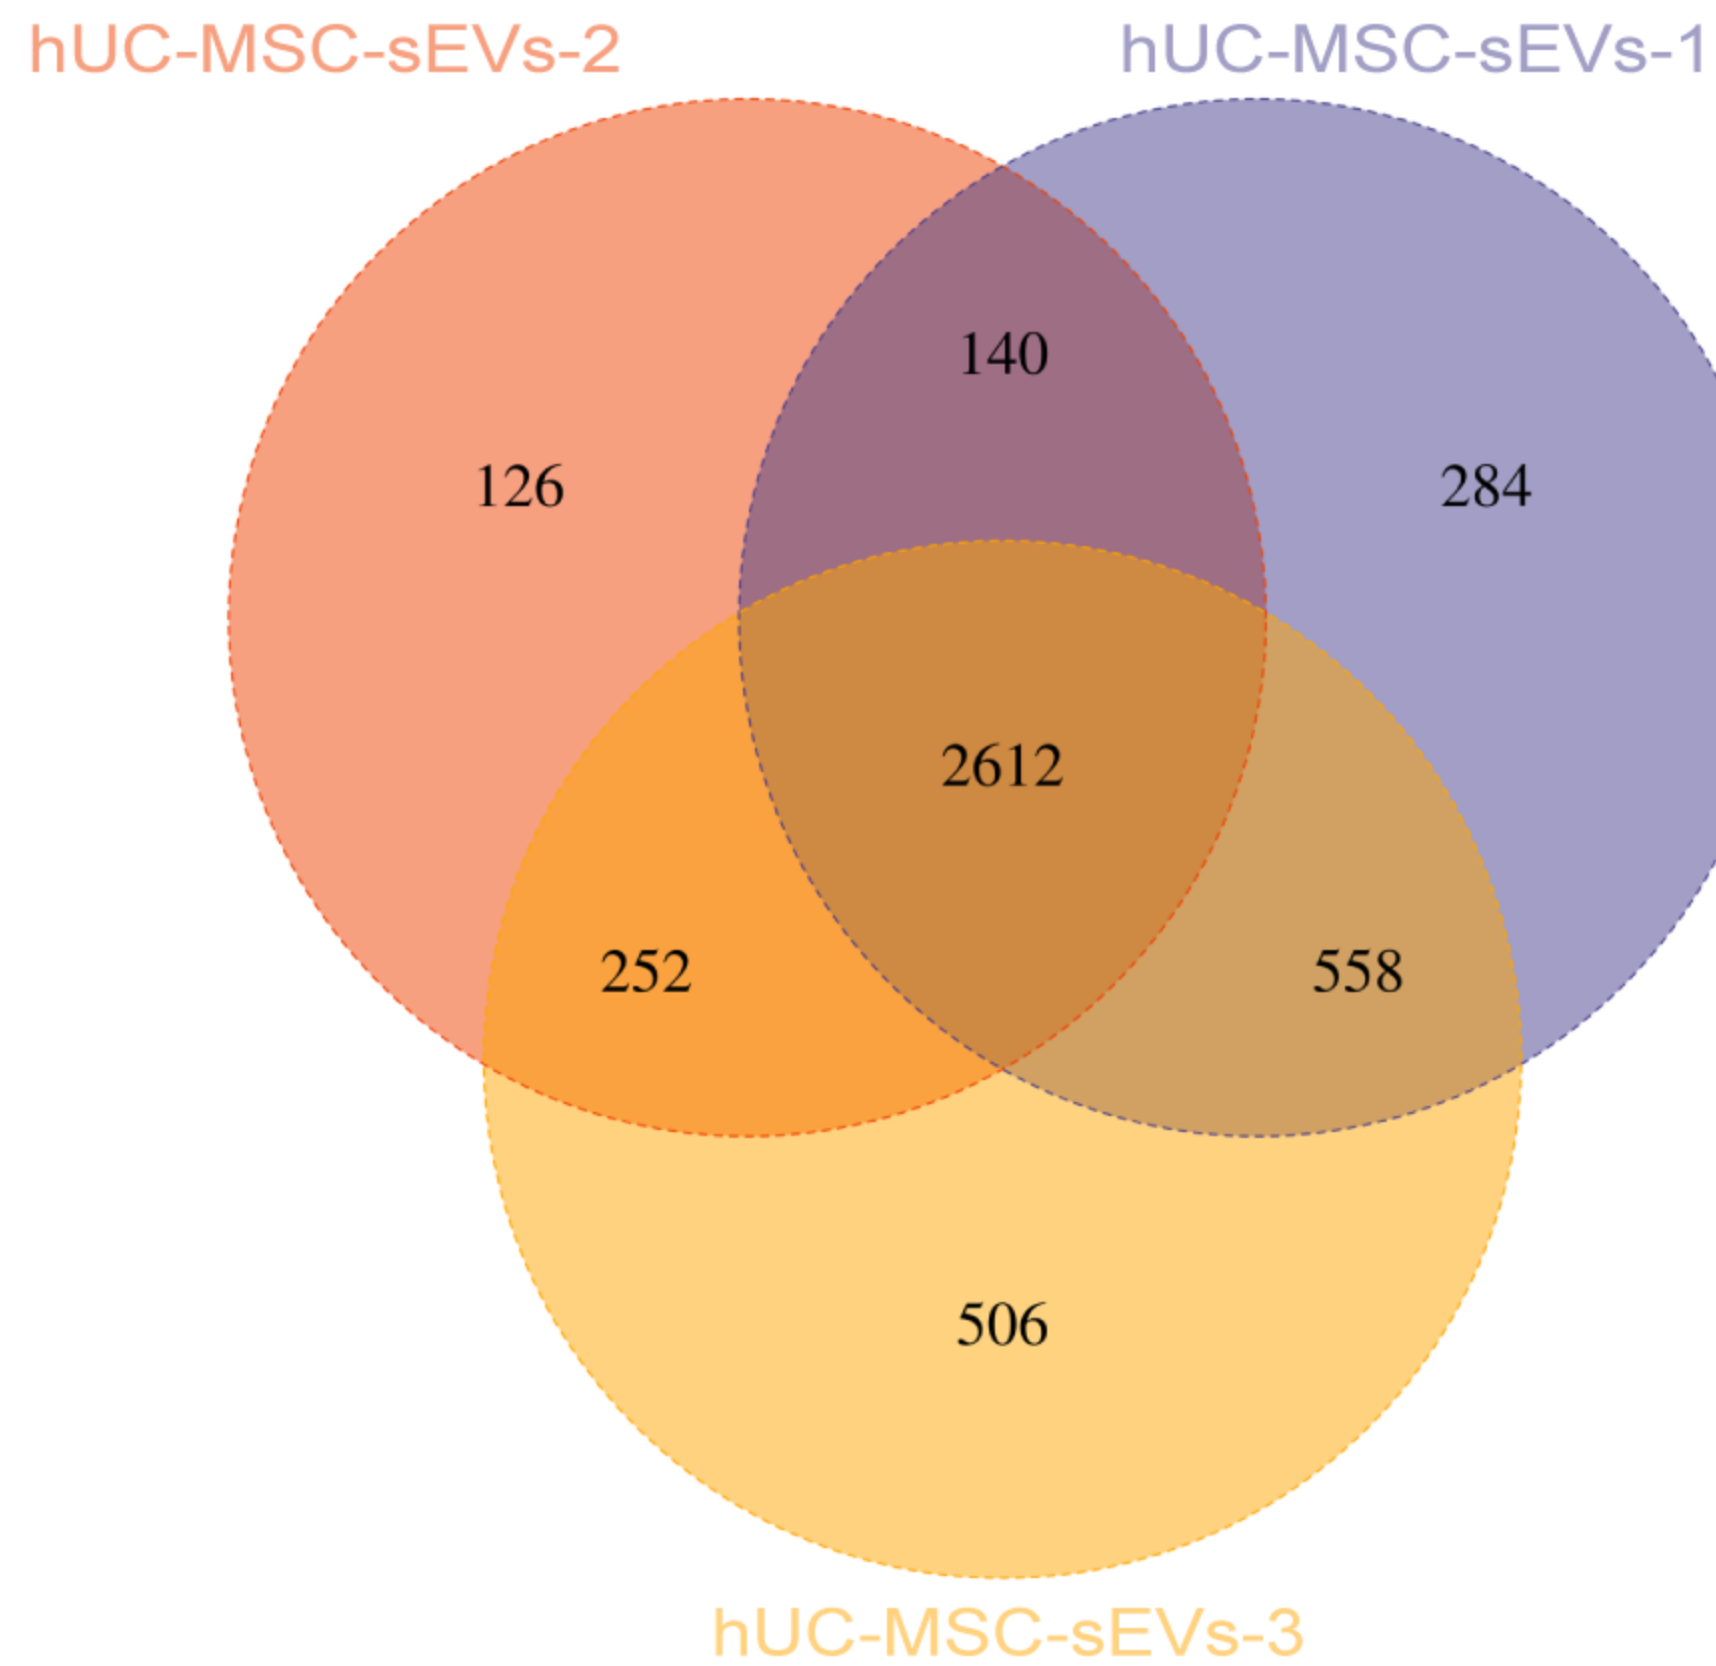**B**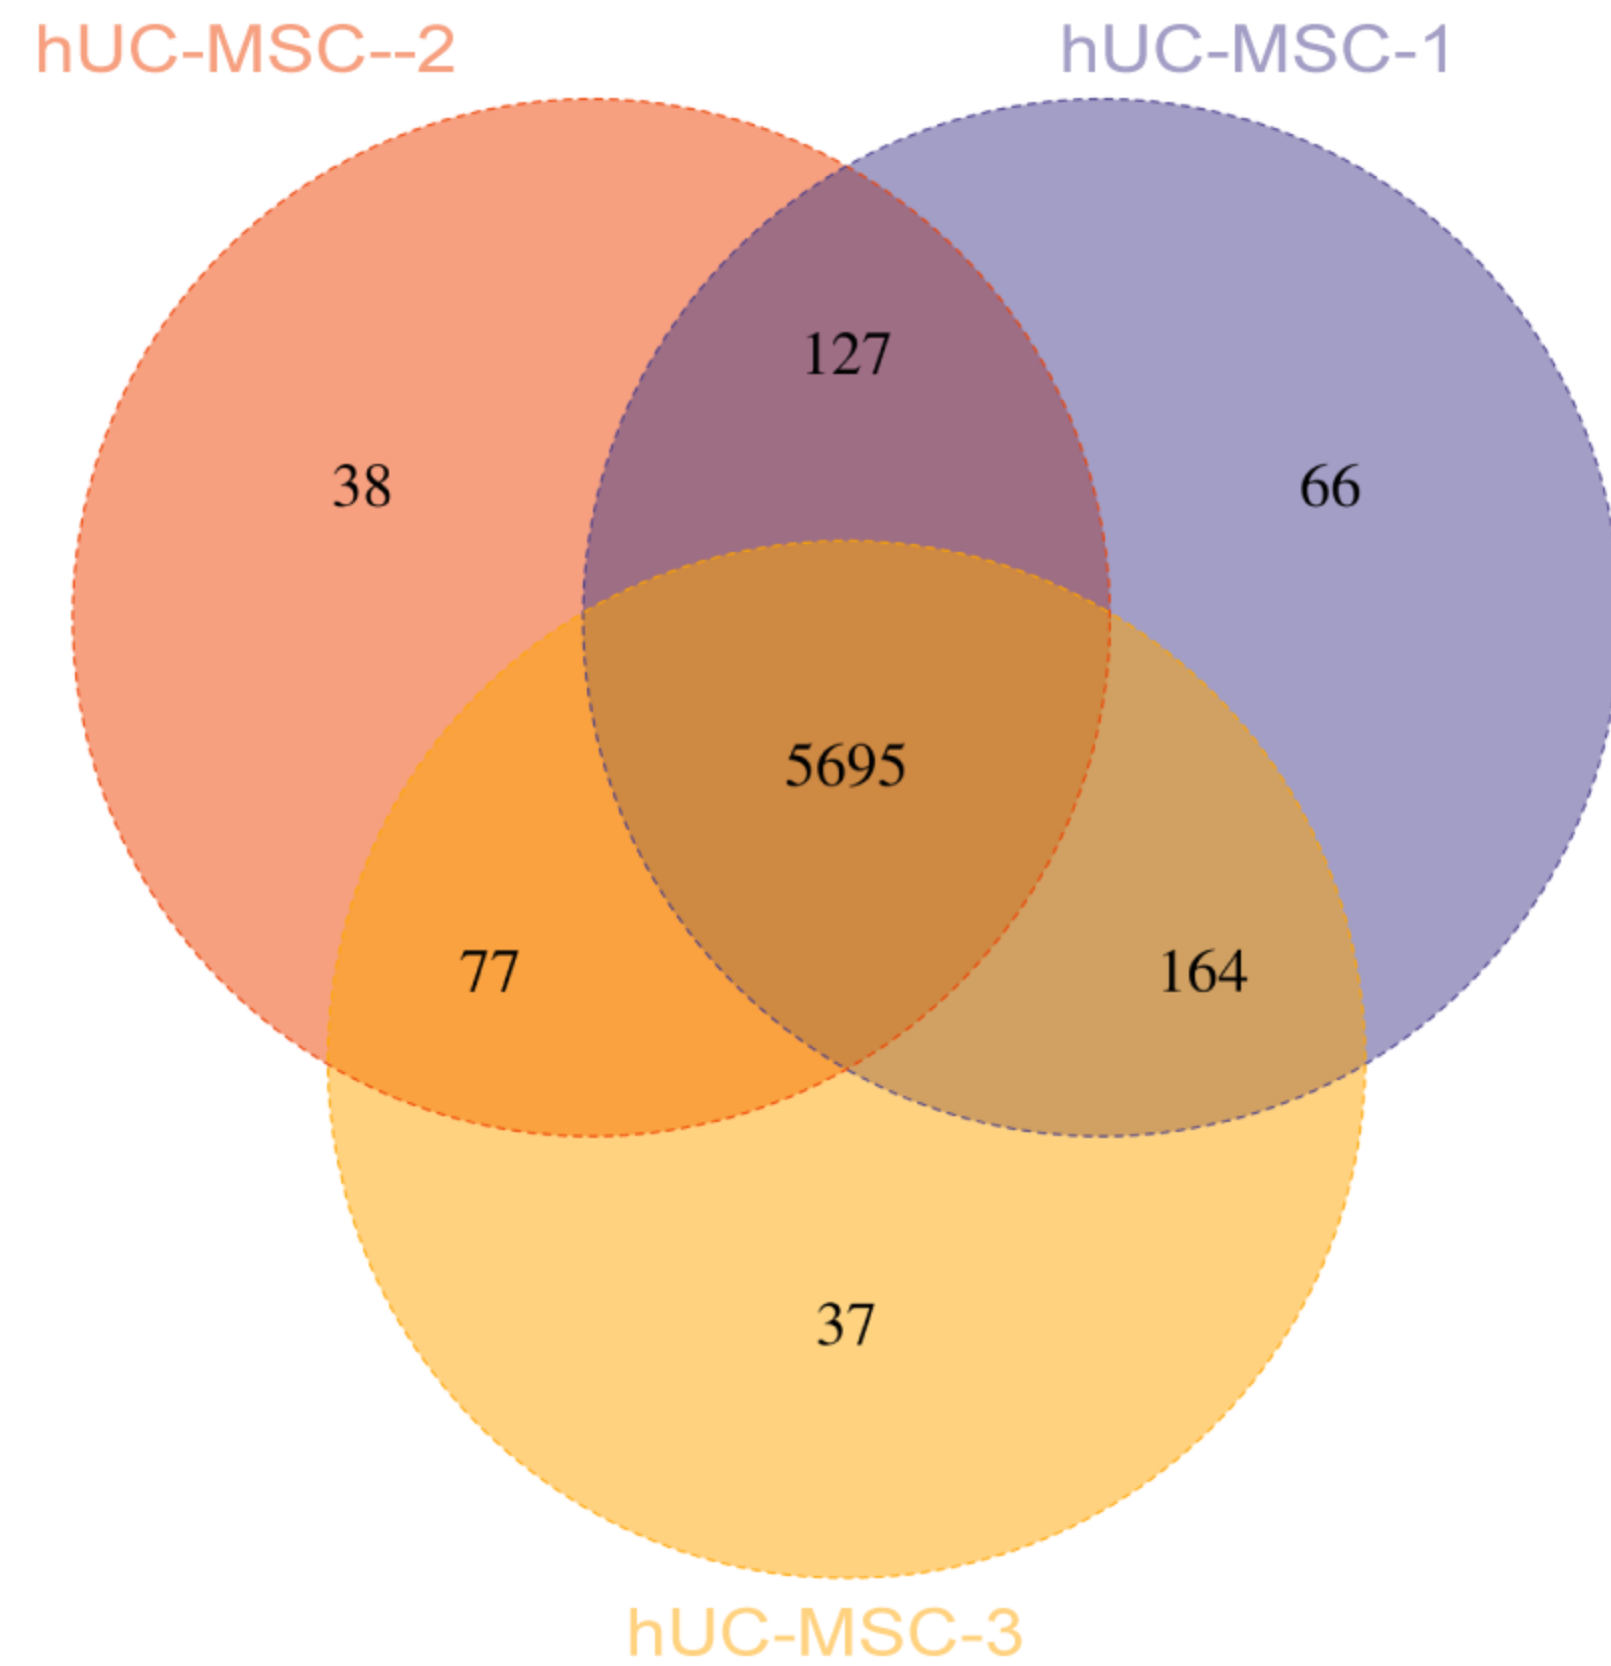**C**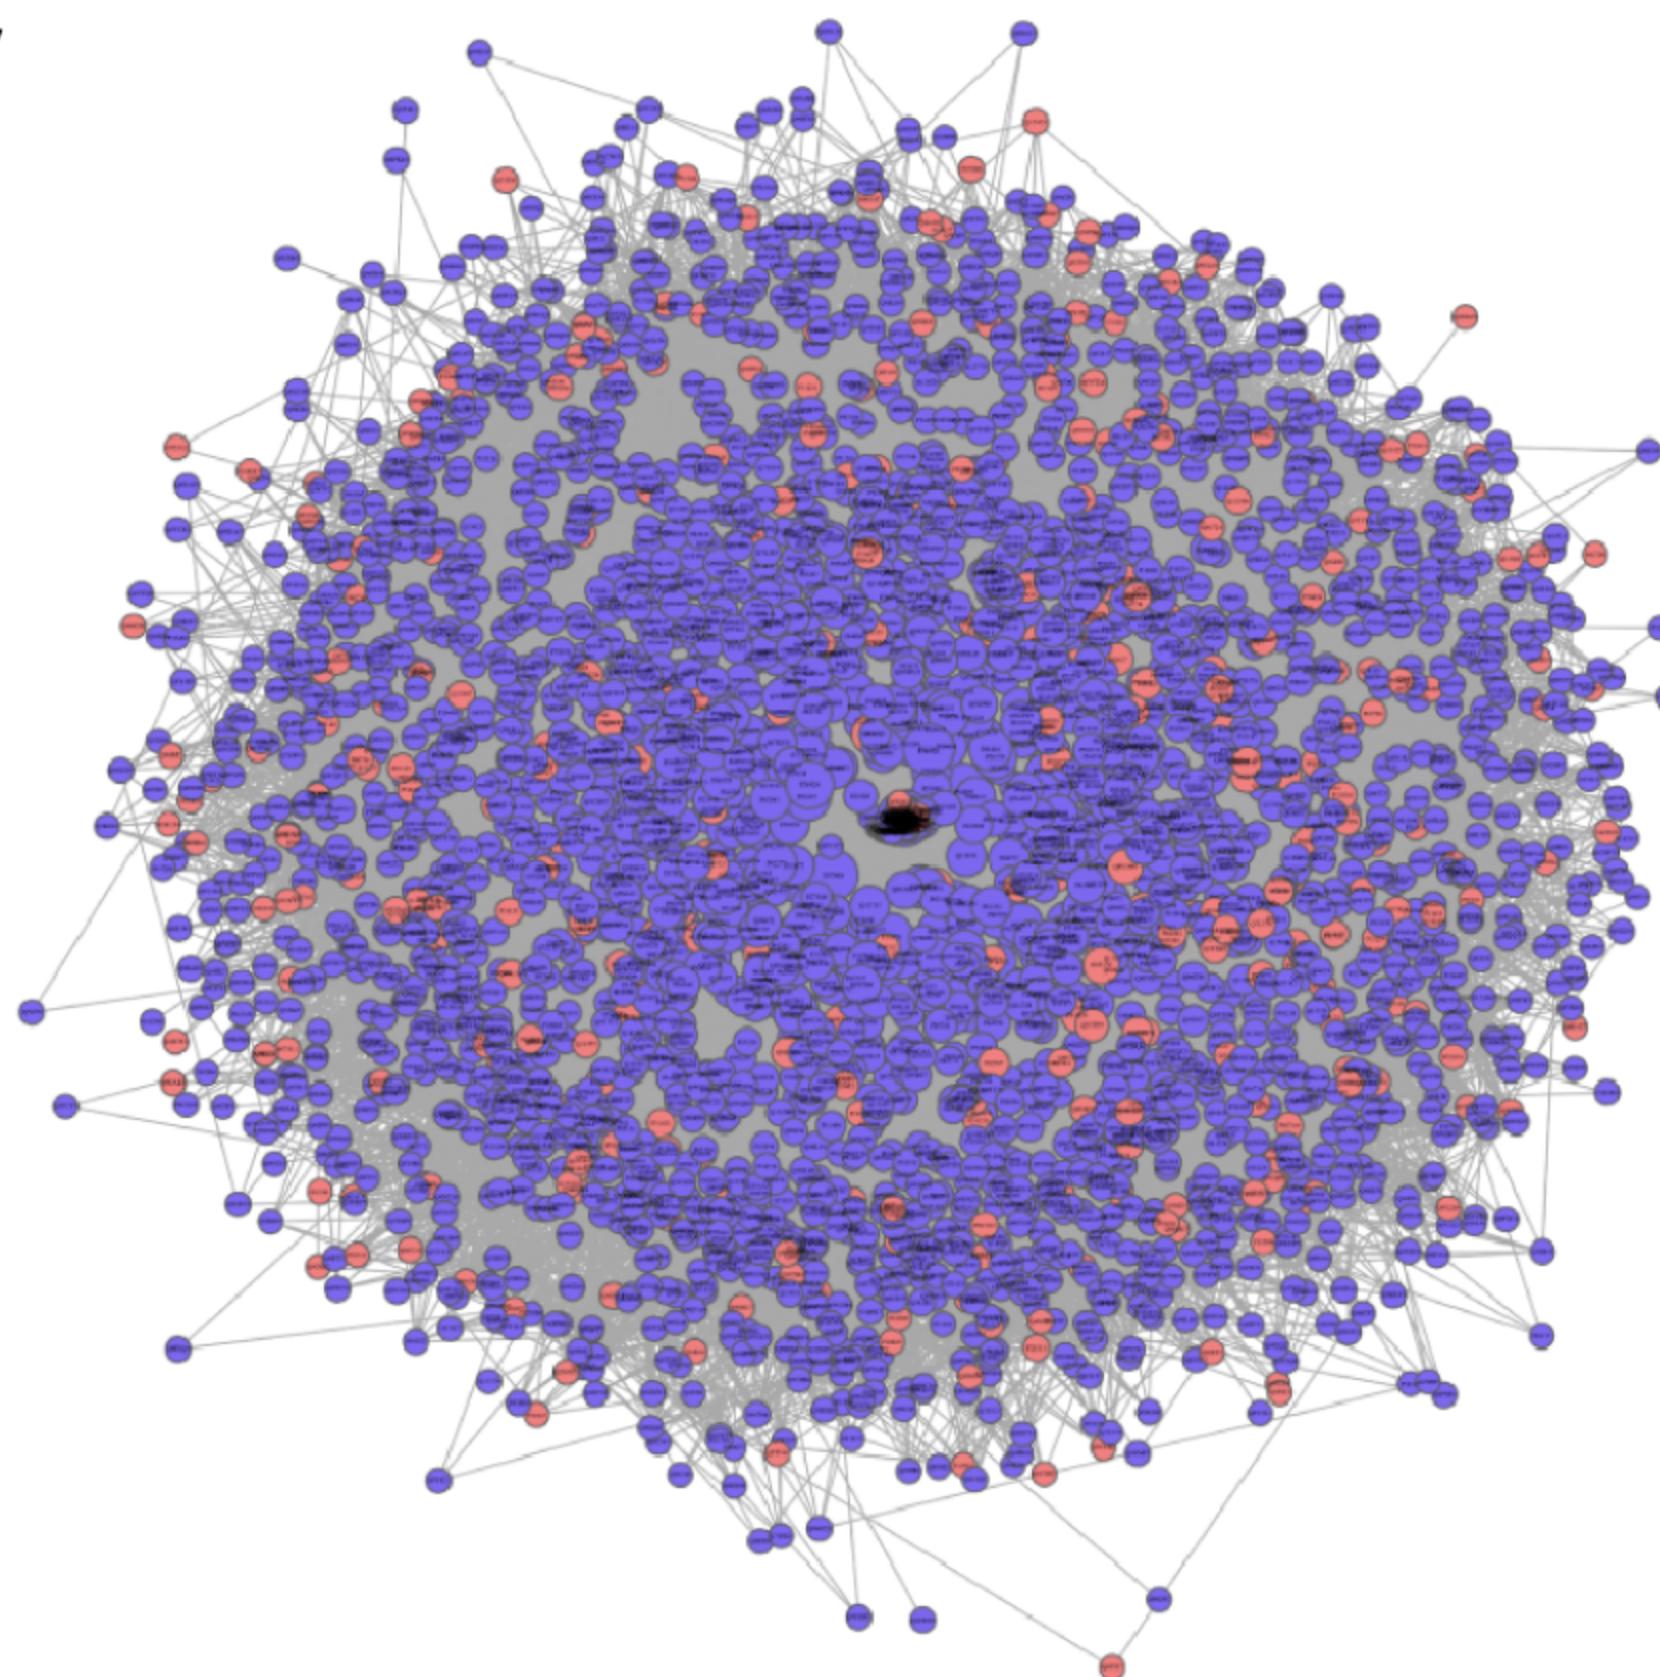**Supplementary Figure 2.**

(A) The Venn diagram for showing the differences and commonalities among three sEVs samples.

(B) The Venn diagram for showing the differences and commonalities among three MSCs samples.

(C) PPI network of differentially expressed genes. Colors represent the expressions of nodes. "Blue" and "orange" indicate the nodes are down- and up-regulated, respectively. The lines represent connections between nodes.

|   | A                                                                                                         | B   |
|---|-----------------------------------------------------------------------------------------------------------|-----|
| 1 | <b>Supplementary Table 1. OARSI scoring system</b>                                                        |     |
| 2 | Normal                                                                                                    | 0   |
| 3 | Loss of Safranin O without structural changes                                                             | 0.5 |
| 4 | Small fibrillations without loss of cartilage                                                             | 1   |
| 5 | Vertical clefts down to the layer immediately below the superficial layer and some loss of surface lamina | 2   |
| 6 | Vertical clefts/erosion to the calcified cartilage extending to <25% of the articular surface             | 3   |
| 7 | Vertical clefts/erosion to the calcified cartilage extending to 25-50% of the articular surface           | 4   |
| 8 | Vertical clefts/erosion to the calcified cartilage extending to 50-75% of the articular surface           | 5   |
| 9 | Vertical clefts/erosion to the calcified cartilage extending to >75% of the articular surface             | 6   |

|    | A                                                                              | B                                           |
|----|--------------------------------------------------------------------------------|---------------------------------------------|
| 1  | <b>Supplementary Table 2. Maxquant identification and quantitation indexes</b> |                                             |
| 2  | <b>Item</b>                                                                    | <b>Value</b>                                |
| 3  | Enzyme                                                                         | Trypsin                                     |
| 4  | Max Missed Cleavages                                                           | 2                                           |
| 5  | Fixed modifications                                                            | Carbamidomethyl (C)                         |
| 6  | Variable modifications                                                         | Oxidation (M)                               |
| 7  | Main search                                                                    | 6 ppm                                       |
| 8  | First search                                                                   | 20ppm                                       |
| 9  | MS/MS Tolerance                                                                | 20ppm                                       |
| 10 | Database                                                                       | Swissprot_Homo_sapiens_20395_20210106.fasta |
| 11 | Database pattern                                                               | Reverse                                     |
| 12 | Include contaminants                                                           | TRUE                                        |
| 13 | protein FDR                                                                    | ≤0.01                                       |
| 14 | Peptide FDR                                                                    | ≤0.01                                       |
| 15 | Peptides used for protein quantification                                       | Use razor and unique peptides               |
| 16 | Time window (match between runs)                                               | 2min                                        |
| 17 | protein quantification                                                         | LFQ                                         |
| 18 | min. ratio count                                                               | 1                                           |

**Supplementary Table 3. The level of LFQ intensity of a class of chondrogenesis - related proteins in hUC-MSC-sEVs and hUC-MSCs**

| Protein IDs | Protein names                                                 | Gene names   | sEV         |            | MSC         |             | Comparison   |                    |
|-------------|---------------------------------------------------------------|--------------|-------------|------------|-------------|-------------|--------------|--------------------|
|             |                                                               |              | Mean        | SD         | Mean        | SD          | sEV>MSC(Y/N) | P value            |
| P01023      | Alpha-2-macroglobulin                                         | <b>A2M</b>   | 62045666.67 | 8590706.22 | 4569966.667 | 666282.5702 | Y            | <b>0.000320562</b> |
| P01137      | Transforming growth factor beta-1 proprotein                  | <b>TGFB1</b> | 103457      | 22386.2459 | 21098.7     | 12418.15159 | Y            | <b>0.005082743</b> |
| P08069      | Insulin-like growth factor 1 receptor                         | IGF1R        | 9084.15     | 7891.02703 | 8761.4      | 2888.239227 | Y            | 0.606832279        |
| P09038      | Fibroblast growth factor 2                                    | FGF2         | 41615.33333 | 25684.2692 | 38921.33333 | 19222.32188 | Y            | 0.891390899        |
| P13611      | Versican core protein                                         | <b>VCAN</b>  | 54683000    | 6711197.88 | 186806.6667 | 56017.6975  | Y            | <b>0.00148323</b>  |
| P00533      | Epidermal growth factor receptor                              | <b>EGFR</b>  | 357860      | 20875.8784 | 256516.6667 | 18772.72046 | Y            | <b>0.003337015</b> |
| Q13443      | Disintegrin and metalloproteinase domain-containing protein 9 | <b>ADAM9</b> | 103302      | 25104.881  | 230616.6667 | 26926.43744 | N            | <b>0.003906461</b> |
| Q9NSY1      | BMP-2-inducible protein kinase                                | BMP2K        | 0           | 0          | 10222.1     | 6361.650164 | N            | 0.137127482        |
| P21810      | Biglycan                                                      | <b>BGN</b>   | 82614       | 10769.9528 | 24034.33333 | 8517.805488 | Y            | <b>0.00178855</b>  |
| P07585      | Decorin                                                       | DCN          | 55123       | 16718.1026 | 46496.66667 | 5005.490619 | Y            | 0.44016493         |
| Q01196      | Runt-related transcription factor 1                           | RUNX1        | 828066.6667 | 1434253.54 | 5618.266667 | 2165.212233 | Y            | 0.376824231        |
| Q13950      | Runt-related transcription factor 2                           | <b>RUNX2</b> | 0           | 0          | 23311.66667 | 3797.203884 | N            | <b>0.000442883</b> |
| Q92954      | Proteoglycan 4                                                | <b>PRG4</b>  | 93475       | 23783.2863 | 0           | 0           | Y            | <b>0.002433232</b> |

Red text represents proteins that are statistically different from hUC-MSC-sEVs compared to hUC-MSCs.

|    | A                                                                    | B                                        |
|----|----------------------------------------------------------------------|------------------------------------------|
| 1  | <b>Supplementary Table 4. List of differentially expressed genes</b> |                                          |
| 2  | <b>Fold change &gt; 2.0, P &lt; 0.05</b>                             | <b>Fold change &lt; 0.5, P &lt; 0.05</b> |
| 3  | <b>Upregulated Proteins</b>                                          | <b>Downregulated Proteins</b>            |
| 4  | <b>Gene name</b>                                                     | <b>Gene name</b>                         |
| 5  | AMBP                                                                 | PLCG1                                    |
| 6  | IGLC2                                                                | ACTB                                     |
| 7  | IGHA1                                                                | DSG2                                     |
| 8  | ITIH2                                                                | STK24                                    |
| 9  | ITIH1                                                                | OSBPL11                                  |
| 10 | ITGA2B                                                               | NAPA                                     |
| 11 | ITIH3                                                                | DYNC1H1                                  |
| 12 | APOC1                                                                | ANXA6                                    |
| 13 | LBP                                                                  | RALA                                     |
| 14 | LPA                                                                  | MIEN1                                    |
| 15 | CP                                                                   | ABCC1                                    |
| 16 | PTX3                                                                 | GJA1                                     |
| 17 | C4BPA                                                                | LEMD2                                    |
| 18 | IGHG1                                                                | PRKCA                                    |
| 19 | SRGN                                                                 | GSTO1                                    |
| 20 | DSC1                                                                 | LZTFL1                                   |
| 21 | PLEK                                                                 | DAG1                                     |
| 22 | APOA1                                                                | MRPS27                                   |
| 23 | IGHG3                                                                | TAOK1                                    |
| 24 | FERMT3                                                               | SAR1A                                    |
| 25 | PRSS3                                                                | ADAM9                                    |
| 26 | VTN                                                                  | RTF1                                     |
| 27 | CLU                                                                  | YARS1                                    |
| 28 | IGHM                                                                 | ACTG1                                    |
| 29 | HAPLN1                                                               | YWHAQ                                    |
| 30 | PON1                                                                 | COL8A1                                   |
| 31 | PTPRJ                                                                | CCN1                                     |
| 32 | KPRP                                                                 | TMED9                                    |
| 33 | FGA                                                                  | ARF4                                     |
| 34 | VCAN                                                                 | STAT5B                                   |
| 35 | C3                                                                   | KIF4A                                    |
| 36 | GP1BB                                                                | TIMM8A                                   |
| 37 | APOA4                                                                | INTS7                                    |
| 38 | CASP14                                                               | PRMT3                                    |
| 39 | C1S                                                                  | RACGAP1                                  |
| 40 | CD5L                                                                 | DDX23                                    |
| 41 | PECAM1                                                               | ROCK2                                    |

|    | A        | B       |
|----|----------|---------|
| 42 | ITGA6    | WDR1    |
| 43 | HRG      | RPP30   |
| 44 | C8B      | ACTR3   |
| 45 | VAMP8    | IDH3A   |
| 46 | DSG1     | CORO1C  |
| 47 | KNG1     | CAV1    |
| 48 | TNFAIP6  | PSMB6   |
| 49 | TUBB1    | SMG8    |
| 50 | APOE     | DSN1    |
| 51 | SLC2A3   | NUP133  |
| 52 | C4B      | SPTLC2  |
| 53 | CLDN5    | TRAP1   |
| 54 | PARVB    | PGM1    |
| 55 | ITGB3    | APPL2   |
| 56 | HLA-G    | CAPZB   |
| 57 | APOB     | DDX31   |
| 58 | FAM131C  | PYGL    |
| 59 | CFH      | FN1     |
| 60 | C8A      | LDHA    |
| 61 | CFB      | HEXB    |
| 62 | TGM3     | ANXA2   |
| 63 | ORM2     | CFL1    |
| 64 | C6       | MEPCE   |
| 65 | JCHAIN   | POLR3D  |
| 66 | PROS1    | CPSF7   |
| 67 | GP1BA    | HSPA1B  |
| 68 | APOL1    | IGF2BP2 |
| 69 | SLC44A2  | SMC1A   |
| 70 | SERPINF2 | PARVA   |
| 71 | PZP      | DBI     |
| 72 | ORM1     | PFN1    |
| 73 | FBLN1    | RAB1B   |
| 74 | MFGE8    | PKM     |
| 75 | FCGBP    | SETD3   |
| 76 | STOM     | CDK1    |
| 77 | DHRX     | MSH6    |
| 78 | APOA2    | MB21D2  |
| 79 | PTPRC    | APEH    |
| 80 | HAS2     | PWP1    |
| 81 | SERPINA1 | DFFA    |
| 82 | TSPAN2   | ZRANB2  |
| 83 | F2       | IDH1    |



|     | A         | B          |
|-----|-----------|------------|
| 84  | IGKV4-1   | PSME4      |
| 85  | NEU1      | CTSD       |
| 86  | SERPIND1  | YWHAG      |
| 87  | DSP       | BCCIP      |
| 88  | SELENOP   | MYCBP      |
| 89  | SLC39A6   | GADD45GIP1 |
| 90  | TSPAN14   | LONP1      |
| 91  | RAB6B     | OPTN       |
| 92  | CD9       | YWHAB      |
| 93  | F5        | GTF3C2     |
| 94  | RAB27B    | ANAPC7     |
| 95  | SRC       | ARPC4      |
| 96  | PLG       | TUBA1B     |
| 97  | PTGFRN    | PTP4A2     |
| 98  | FAM83D    | ADH5       |
| 99  | F10       | TBC1D2     |
| 100 | F11R      | RBP1       |
| 101 | EDIL3     | RAVER1     |
| 102 | SERPINB12 | MEAK7      |
| 103 | GP9       | CNDP2      |
| 104 | SERPINF1  | ERCC6L     |
| 105 | ADA       | ARHGAP1    |
| 106 | IFIT5     | GEMIN4     |
| 107 | KCTD2     | LSM8       |
| 108 | TSPAN9    | CMC1       |
| 109 | CD47      | TMEM237    |
| 110 | SNX1      | TPM3       |
| 111 | SRI       | TBK1       |
| 112 | CSF1      | MANF       |
| 113 | STXBP2    | DLGAP5     |
| 114 | TSPAN33   | TMX3       |
| 115 | HBB       | TPM2       |
| 116 | AGT       | PTBP3      |
| 117 | SLC1A5    | TRIP6      |
| 118 | EHD3      | MINK1      |
| 119 | GPLD1     | DCBLD2     |
| 120 | SERPINA3  | AFDN       |
| 121 | HAGH      | FLNA       |
| 122 | MAPK12    | ARL6IP5    |
| 123 | SERPING1  | NT5C3A     |
| 124 | NADSYN1   | USP8       |
| 125 | SERPINC1  | CCAR1      |

|     | A        | B        |
|-----|----------|----------|
| 126 | LGALS3BP | CAMK2D   |
| 127 | C4A      | HNRNPUL2 |
| 128 | KLKB1    | TUBB     |
| 129 | JUP      | FADS1    |
| 130 | CD63     | SAMM50   |
| 131 | A2M      | PPP1CA   |
| 132 | GNAQ     | ARPC3    |
| 133 | FGG      | ANXA1    |
| 134 | ITIH4    | SPEN     |
| 135 | SLC38A5  | NIBAN1   |
| 136 | PPP2R3A  | COG5     |
| 137 | EVA1B    | PRDX5    |
| 138 | HLA-A    | RAB2A    |
| 139 | ANO6     | DHODH    |
| 140 | XYLT1    | MRPL15   |
| 141 | PLSCR1   | CNOT3    |
| 142 | ACOX3    | DCTD     |
| 143 | SLC39A13 | NOP2     |
| 144 | ADD3     | NUP88    |
| 145 | LGALSL   | AMPD2    |
| 146 | RAP1B    | GOLM1    |
| 147 | TTYH3    | UBL4A    |
| 148 | HBA1     | ARHGEF12 |
| 149 | STARD13  | ZC3H15   |
| 150 | NRDE2    | NCAPD2   |
| 151 | NFIL3    | FHOD1    |
| 152 | CAVIN2   | CYB5R3   |
| 153 | MRPS2    | RHOT2    |
| 154 | CD81     | COA7     |
| 155 | BET1     | PUM3     |
| 156 | ALOX12B  | XPO6     |
| 157 | COL4A2   | CD2BP2   |
| 158 | HMCES    | CPNE3    |
| 159 | MRM2     | SMTN     |
| 160 | BIN2     | ZFAND6   |
| 161 | SLC39A14 | TPP1     |
| 162 | OSBPL1A  | COX20    |
| 163 | IGHV3-15 | CAPN7    |
| 164 | CISD3    | STAM     |
| 165 | TP53I11  | TALDO1   |
| 166 | COL1A2   | PGD      |
| 167 | GPATCH11 | PSMB2    |

|     | A        | B        |
|-----|----------|----------|
| 168 | RAB10    | UBE4B    |
| 169 | ARHGAP31 | TMED2    |
| 170 | GNA13    | MDN1     |
| 171 | CD46     | ARIH1    |
| 172 | CD82     | ACSL4    |
| 173 | LYN      | ICAM1    |
| 174 | NRP1     | SMARCA5  |
| 175 | SDC4     | MYO1C    |
| 176 | ITGA4    | CCAR2    |
| 177 | APOC2    | PARP4    |
| 178 | ZHX1     | CHERP    |
| 179 | MPIG6B   | AKAP9    |
| 180 | SLC44A1  | CUX1     |
| 181 | SLC1A4   | ESF1     |
| 182 | NSA2     | RPL10    |
| 183 | MLLT1    | PRRC2B   |
| 184 | ITGA2    | MPP5     |
| 185 | MMUT     | UBE2N    |
| 186 | GOLM2    | RAB18    |
| 187 | PNPLA6   | ALDH9A1  |
| 188 | TMBIM1   | CNOT1    |
| 189 | C1R      | UBR5     |
| 190 | TM4SF1   | TIMM13   |
| 191 | GPN3     | LPCAT1   |
| 192 | TRMT5    | TMEM9    |
| 193 | CPB2     | CAPZA1   |
| 194 | SLC2A1   | MBNL1    |
| 195 | COL1A1   | MGAT1    |
| 196 | DNM1     | SCAMP2   |
| 197 | UFD1     | SEPTIN7  |
| 198 | DPP4     | OPA1     |
| 199 | C1QB     | MAP4K4   |
| 200 | FLCN     | SFN      |
| 201 | POLR3A   | PGK1     |
| 202 | HLA-B    | LDHB     |
| 203 | RALB     | WBP11    |
| 204 | F3       | UBE2K    |
| 205 | PRPF38B  | GPX1     |
| 206 | RRP12    | LMAN2    |
| 207 | PEX16    | GDI2     |
| 208 | RAP1A    | DDX10    |
| 209 | HEMK1    | SLC9A3R1 |

|     | A        | B        |
|-----|----------|----------|
| 210 | ANXA3    | RNF114   |
| 211 | SLC39A10 | CAP1     |
| 212 | ADAM10   | KDEL2    |
| 213 | MYCT1    | PNP      |
| 214 | LHFPL2   | TOP2A    |
| 215 | UHRF2    | DHX38    |
| 216 | QSOX1    | XPOT     |
| 217 | PLP2     | UBAP2L   |
| 218 | HEG1     | TAGLN2   |
| 219 | TGFB1    | HNRNPL   |
| 220 | CD151    | DDAH2    |
| 221 | DOCK1    | HUWE1    |
| 222 | PLSCR3   | APOH     |
| 223 | SYTL4    | COX7A2   |
| 224 | RAP2B    | PPIL2    |
| 225 | POLRMT   | RBM19    |
| 226 | ABHD12   | RB1      |
| 227 | ITPR3    | STAMBP   |
| 228 | CFDP1    | PPP1R9B  |
| 229 | FBXO28   | ALAD     |
| 230 | GNB1     | ANKZF1   |
| 231 | HP       | MAT2B    |
| 232 | HLA-C    | VPS25    |
| 233 | SLC16A1  | TMEM106B |
| 234 | PDPK1    | GNL3     |
| 235 | FARP1    | DCAF13   |
| 236 | GPRC5B   | PSMB1    |
| 237 | POLE     | GAPDH    |
| 238 | AFM      | RAB32    |
| 239 | ABR      | GLG1     |
| 240 | SLC29A1  | ACTN1    |
| 241 | COL3A1   | RPF1     |
| 242 | RAF1     | RND3     |
| 243 | CNOT7    | ENO1     |
| 244 | ACYP1    | ARPC2    |
| 245 | PDRG1    | PACS1    |
| 246 | PGLYRP2  | PAFAH1B1 |
| 247 | ZNF516   | ARHGDI1  |
| 248 | ITGA1    | NSFL1C   |
| 249 | POM121C  | G6PD     |
| 250 | GASK1B   | AKAP11   |
| 251 | ANXA11   | PRKDC    |

|     | A        | B       |
|-----|----------|---------|
| 252 | COL6A3   | SYVN1   |
| 253 | SIAE     | TUBA1C  |
| 254 | ANPEP    | SURF4   |
| 255 | ATRN     | CLIC4   |
| 256 | IPO13    | PURA    |
| 257 | TGFBI    | SART1   |
| 258 | FNBP4    | EHD2    |
| 259 | CMIP     | CDS2    |
| 260 | SLC3A2   | BCL2L13 |
| 261 | AGO3     | PSMC6   |
| 262 | GNA14    | MRPL38  |
| 263 | FERMT1   | GSTM4   |
| 264 | APOC3    | MRPL14  |
| 265 | BGN      | CAPNS1  |
| 266 | PRIM1    | ESD     |
| 267 | SEC14L1  | HNRNPH3 |
| 268 | TBCC     | KIFBP   |
| 269 | IKBKG    | NHLRC2  |
| 270 | ABRAXAS2 | PHETA2  |
| 271 | DBT      | ESYT1   |
| 272 | CD55     | HADHB   |
| 273 | ITPKC    | DENR    |
| 274 | PLTP     | SPAG5   |
| 275 | SUPT6H   | PSME2   |
| 276 | SLC6A6   | CCT2    |
| 277 | TNS2     | CSNK1A1 |
| 278 | ITGA5    | PSMA1   |
| 279 | UBE2R2   | ACTR1B  |
| 280 | NMRAL1   | M6PR    |
| 281 | POLR3G   | HSPA8   |
| 282 | TF       | DDX46   |
| 283 | AMFR     | PAK4    |
| 284 | VPS51    | RIF1    |
| 285 | CORO1A   | SHPK    |
| 286 | AGL      | GRB2    |
| 287 | CD109    | DAB2    |
| 288 | SLC16A3  | MYOF    |
| 289 | GSDMD    | CSK     |
| 290 | SLC7A1   | TPMT    |
| 291 | SLC7A5   | EZR     |
| 292 | ENG      | INTS13  |
| 293 | ITGB1    | C1QBP   |

|     | A       | B        |
|-----|---------|----------|
| 294 | EHD1    | TFB2M    |
| 295 | UGGT2   | CANX     |
| 296 | PPDPF   | PPIA     |
| 297 | RAC2    | ANAPC1   |
| 298 | SETD2   | COX6B1   |
| 299 | AHSG    | MSRA     |
| 300 | KIF22   | PPP1R10  |
| 301 | CLDND1  | TCOF1    |
| 302 | CALHM5  | ATP5F1A  |
| 303 | SLC5A6  | C9orf78  |
| 304 | GULP1   | FRMD6    |
| 305 | CYFIP1  | CNN2     |
| 306 | PAWR    | DNM2     |
| 307 | AZGP1   | MARS1    |
| 308 | IQGAP3  | TMSB4X   |
| 309 | SLC41A3 | OSGEP    |
| 310 | EIF1AY  | ARL1     |
| 311 | SCCPDH  | ALDOC    |
| 312 | FTSJ1   | COPS5    |
| 313 | MME     | RDX      |
| 314 | JAM3    | MAP1LC3B |
| 315 | ATP5MG  | MRE11    |
| 316 | RP2     | ACSL1    |
| 317 | CWC27   | MESD     |
| 318 | TLE1    | PAPSS1   |
| 319 | RAB11B  | PSMA2    |
| 320 | RAD18   | PSMB5    |
| 321 | TYW1    | TRMT10C  |
| 322 | PLAUR   | DUSP3    |
| 323 | RSU1    | SERPINB6 |
| 324 | RRAS    | POLD2    |
| 325 | EP300   | ACAD9    |
| 326 | BSG     | XRCC5    |
| 327 | LTN1    | VASN     |
| 328 | RBPJ    | NCLN     |
| 329 | ERCC3   | SMARCB1  |
| 330 | YTHDC1  | ARMC9    |
| 331 | NDUFS5  | GANAB    |
| 332 | LPAR1   | SPECC1L  |
| 333 | EPHA2   | SMARCD2  |
| 334 | GPRC5A  | LMAN1    |
| 335 | BICD2   | SLC35F6  |

|     | A      | B        |
|-----|--------|----------|
| 336 | PRPF39 | ALDOA    |
| 337 | ITGAV  | ARPC1B   |
| 338 |        | MRPL30   |
| 339 |        | BZW1     |
| 340 |        | OTUB1    |
| 341 |        | TMED10   |
| 342 |        | GTF3C1   |
| 343 |        | UTP20    |
| 344 |        | AAGAB    |
| 345 |        | PEA15    |
| 346 |        | EDC4     |
| 347 |        | PRPF40A  |
| 348 |        | MMS19    |
| 349 |        | DST      |
| 350 |        | MTHFD1L  |
| 351 |        | PFKP     |
| 352 |        | FARSA    |
| 353 |        | SRP9     |
| 354 |        | CSDE1    |
| 355 |        | INF2     |
| 356 |        | SIPA1L1  |
| 357 |        | PQBP1    |
| 358 |        | ARIH2    |
| 359 |        | GNB2     |
| 360 |        | LSM4     |
| 361 |        | NAA50    |
| 362 |        | AP2A2    |
| 363 |        | LSS      |
| 364 |        | MYL6     |
| 365 |        | CHD2     |
| 366 |        | ADSL     |
| 367 |        | EFEMP1   |
| 368 |        | COX5A    |
| 369 |        | PDIA6    |
| 370 |        | RNH1     |
| 371 |        | HECTD1   |
| 372 |        | TXNDC17  |
| 373 |        | POLD1    |
| 374 |        | ACOT7    |
| 375 |        | DOCK7    |
| 376 |        | PSME3IP1 |
| 377 |        | EEF2     |

|     | A | B       |
|-----|---|---------|
| 378 |   | TRIP4   |
| 379 |   | GEMIN5  |
| 380 |   | PYCR2   |
| 381 |   | HMOX2   |
| 382 |   | POLR2B  |
| 383 |   | PSMD12  |
| 384 |   | BIN1    |
| 385 |   | TBCE    |
| 386 |   | PPP2R1A |
| 387 |   | PSMC5   |
| 388 |   | GALK1   |
| 389 |   | IQGAP1  |
| 390 |   | WASHC4  |
| 391 |   | MAN2A1  |
| 392 |   | NUP35   |
| 393 |   | H2BC13  |
| 394 |   | SWAP70  |
| 395 |   | GAK     |
| 396 |   | MRM1    |
| 397 |   | RBM4    |
| 398 |   | NCOR1   |
| 399 |   | UBQLN2  |
| 400 |   | FIP1L1  |
| 401 |   | FTO     |
| 402 |   | AP1B1   |
| 403 |   | CLPTM1  |
| 404 |   | CRAT    |
| 405 |   | CCT8    |
| 406 |   | SEC63   |
| 407 |   | PPP1R8  |
| 408 |   | ATP13A1 |
| 409 |   | RUVBL1  |
| 410 |   | TAOK3   |
| 411 |   | CKAP5   |
| 412 |   | NUP155  |
| 413 |   | PRPF31  |
| 414 |   | TMSB10  |
| 415 |   | RPS7    |
| 416 |   | SRPRB   |
| 417 |   | UBA3    |
| 418 |   | FKBP9   |
| 419 |   | EEF1A1  |



|     | A | B        |
|-----|---|----------|
| 420 |   | ANKFY1   |
| 421 |   | ALDH1B1  |
| 422 |   | EHBP1L1  |
| 423 |   | PNO1     |
| 424 |   | CCT4     |
| 425 |   | TJP2     |
| 426 |   | GNL2     |
| 427 |   | ETFDH    |
| 428 |   | CNRIP1   |
| 429 |   | FKBP1A   |
| 430 |   | ATXN2L   |
| 431 |   | ACTR1A   |
| 432 |   | MRPS9    |
| 433 |   | OSBPL3   |
| 434 |   | CDKN2AIP |
| 435 |   | CASP6    |
| 436 |   | RPA1     |
| 437 |   | PTCD3    |
| 438 |   | CPSF2    |
| 439 |   | TPM4     |
| 440 |   | TKFC     |
| 441 |   | HBS1L    |
| 442 |   | ATP2A2   |
| 443 |   | EEA1     |
| 444 |   | VPS29    |
| 445 |   | UGGT1    |
| 446 |   | MRPS35   |
| 447 |   | WDR46    |
| 448 |   | HSP90AB1 |
| 449 |   | PDCD10   |
| 450 |   | EIF4A1   |
| 451 |   | RAD21    |
| 452 |   | PACSIN3  |
| 453 |   | PDE4DIP  |
| 454 |   | NFS1     |
| 455 |   | TMX1     |
| 456 |   | POLR2A   |
| 457 |   | ELAC2    |
| 458 |   | DNAJC8   |
| 459 |   | GPX7     |
| 460 |   | DBNL     |
| 461 |   | MTHFD1   |

|     | A | B        |
|-----|---|----------|
| 462 |   | PGAM5    |
| 463 |   | EIF2AK4  |
| 464 |   | HK1      |
| 465 |   | WDR36    |
| 466 |   | NECAP2   |
| 467 |   | FBN1     |
| 468 |   | SEPTIN2  |
| 469 |   | CRYZ     |
| 470 |   | EXOSC2   |
| 471 |   | DYNLL1   |
| 472 |   | SMARCC1  |
| 473 |   | SKP1     |
| 474 |   | SEH1L    |
| 475 |   | GOT1     |
| 476 |   | ABRACL   |
| 477 |   | AHCY     |
| 478 |   | CLUH     |
| 479 |   | GLRX     |
| 480 |   | TRIO     |
| 481 |   | THOC2    |
| 482 |   | PAPSS2   |
| 483 |   | EMC3     |
| 484 |   | SLC9A3R2 |
| 485 |   | AP3M1    |
| 486 |   | TMEM165  |
| 487 |   | UBA1     |
| 488 |   | CSPG4    |
| 489 |   | MYO9B    |
| 490 |   | SEPHS1   |
| 491 |   | PUM1     |
| 492 |   | CCDC6    |
| 493 |   | NSF      |
| 494 |   | RRAGC    |
| 495 |   | TCF25    |
| 496 |   | BCAR1    |
| 497 |   | PSMA3    |
| 498 |   | TGOLN2   |
| 499 |   | CBX5     |
| 500 |   | PRDX6    |
| 501 |   | GPS1     |
| 502 |   | TRMT112  |
| 503 |   | HSD17B4  |

|     | A | B        |
|-----|---|----------|
| 504 |   | TCP1     |
| 505 |   | ACTA2    |
| 506 |   | ACTR2    |
| 507 |   | SNRPA    |
| 508 |   | PINX1    |
| 509 |   | TPR      |
| 510 |   | PPFIBP1  |
| 511 |   | NAMPT    |
| 512 |   | PSMA7    |
| 513 |   | CCT3     |
| 514 |   | ATP6V1A  |
| 515 |   | MYH9     |
| 516 |   | LARS2    |
| 517 |   | FASN     |
| 518 |   | SRSF9    |
| 519 |   | NDUFS2   |
| 520 |   | ITPR2    |
| 521 |   | HERC4    |
| 522 |   | UROD     |
| 523 |   | LSM1     |
| 524 |   | PFKL     |
| 525 |   | DCTN4    |
| 526 |   | TSNAX    |
| 527 |   | GTF2B    |
| 528 |   | MOV10    |
| 529 |   | GOT2     |
| 530 |   | CAD      |
| 531 |   | TNKS1BP1 |
| 532 |   | OGFOD1   |
| 533 |   | TWF2     |
| 534 |   | LAP3     |
| 535 |   | NNMT     |
| 536 |   | XRCC1    |
| 537 |   | STRN     |
| 538 |   | EXOSC7   |
| 539 |   | SOD1     |
| 540 |   | SRPK1    |
| 541 |   | THOP1    |
| 542 |   | ZW10     |
| 543 |   | TPI1     |
| 544 |   | RANBP3   |
| 545 |   | CLTC     |

|     | A | B        |
|-----|---|----------|
| 546 |   | HP1BP3   |
| 547 |   | TECR     |
| 548 |   | IPO8     |
| 549 |   | PMPCA    |
| 550 |   | PTPN11   |
| 551 |   | CCT5     |
| 552 |   | TUBB4B   |
| 553 |   | OXSRI    |
| 554 |   | RTN4     |
| 555 |   | WASHC2A  |
| 556 |   | LRP1     |
| 557 |   | CAPZA2   |
| 558 |   | CAPRIN1  |
| 559 |   | ZC3H4    |
| 560 |   | AARS1    |
| 561 |   | FDPS     |
| 562 |   | CHMP4A   |
| 563 |   | ADSS2    |
| 564 |   | DHX30    |
| 565 |   | ACADVL   |
| 566 |   | TM9SF2   |
| 567 |   | GSTP1    |
| 568 |   | GPSM1    |
| 569 |   | HMGCS1   |
| 570 |   | PPIH     |
| 571 |   | ACIN1    |
| 572 |   | PEAK1    |
| 573 |   | XAB2     |
| 574 |   | POGLUT3  |
| 575 |   | FKBP8    |
| 576 |   | CDC5L    |
| 577 |   | EIF3J    |
| 578 |   | PCOLCE   |
| 579 |   | BRAT1    |
| 580 |   | XPNPEP1  |
| 581 |   | CSTF3    |
| 582 |   | PRDX1    |
| 583 |   | CPSF6    |
| 584 |   | MFAP1    |
| 585 |   | OGA      |
| 586 |   | PPP1R2   |
| 587 |   | CDK5RAP3 |

|     | A | B        |
|-----|---|----------|
| 588 |   | FKBP3    |
| 589 |   | EPRS1    |
| 590 |   | ARFGAP2  |
| 591 |   | RNF213   |
| 592 |   | NAP1L4   |
| 593 |   | PGAM1    |
| 594 |   | VCP      |
| 595 |   | PPP6R3   |
| 596 |   | TCAF1    |
| 597 |   | STAT1    |
| 598 |   | AP2A1    |
| 599 |   | FSCN1    |
| 600 |   | STMN1    |
| 601 |   | ACO1     |
| 602 |   | SACM1L   |
| 603 |   | CLPX     |
| 604 |   | GOLIM4   |
| 605 |   | EEFSEC   |
| 606 |   | U2AF2    |
| 607 |   | RGS10    |
| 608 |   | MARK2    |
| 609 |   | LRPAP1   |
| 610 |   | SPAG9    |
| 611 |   | ANLN     |
| 612 |   | BCAT1    |
| 613 |   | IRF2BPL  |
| 614 |   | UBR4     |
| 615 |   | EIF3M    |
| 616 |   | MAPK1    |
| 617 |   | CBR1     |
| 618 |   | SRSF1    |
| 619 |   | EIF1AX   |
| 620 |   | ZC3HC1   |
| 621 |   | MRPL11   |
| 622 |   | GLRX3    |
| 623 |   | MTPN     |
| 624 |   | GPI      |
| 625 |   | UGP2     |
| 626 |   | SAE1     |
| 627 |   | SLC25A11 |
| 628 |   | CCT7     |
| 629 |   | NDUFA9   |

|     | A | B        |
|-----|---|----------|
| 630 |   | SSR4     |
| 631 |   | ANP32A   |
| 632 |   | EXOSC1   |
| 633 |   | TRIP11   |
| 634 |   | SART3    |
| 635 |   | CS       |
| 636 |   | PPID     |
| 637 |   | PSMD5    |
| 638 |   | BCAP31   |
| 639 |   | DAP3     |
| 640 |   | BZW2     |
| 641 |   | ZNF638   |
| 642 |   | NUDT21   |
| 643 |   | ERLEC1   |
| 644 |   | CAND1    |
| 645 |   | PRPF4    |
| 646 |   | TIMM50   |
| 647 |   | HSP90AA1 |
| 648 |   | MPG      |
| 649 |   | STAT6    |
| 650 |   | CWF19L1  |
| 651 |   | HEATR1   |
| 652 |   | SUCLG2   |
| 653 |   | DLD      |
| 654 |   | LUM      |
| 655 |   | YTHDF2   |
| 656 |   | RABL6    |
| 657 |   | SCAF8    |
| 658 |   | POR      |
| 659 |   | ERO1A    |
| 660 |   | TPT1     |
| 661 |   | ETF1     |
| 662 |   | LAMB1    |
| 663 |   | NUDC     |
| 664 |   | EML4     |
| 665 |   | LAMTOR5  |
| 666 |   | FTH1     |
| 667 |   | CCDC88A  |
| 668 |   | IARS1    |
| 669 |   | PSMB4    |
| 670 |   | GEMIN2   |
| 671 |   | GNS      |

|     | A | B        |
|-----|---|----------|
| 672 |   | PGP      |
| 673 |   | NIT2     |
| 674 |   | UBE3C    |
| 675 |   | VPS35    |
| 676 |   | MAP1A    |
| 677 |   | SRP72    |
| 678 |   | AFG3L2   |
| 679 |   | GMPPB    |
| 680 |   | PPP2R5D  |
| 681 |   | DYNC1I2  |
| 682 |   | PREP     |
| 683 |   | APPL1    |
| 684 |   | UQCRC1   |
| 685 |   | PACSIN2  |
| 686 |   | FABP5    |
| 687 |   | SFXN1    |
| 688 |   | MIF      |
| 689 |   | RCC1     |
| 690 |   | NPEPPS   |
| 691 |   | PAPOLA   |
| 692 |   | ANKLE2   |
| 693 |   | HCFC1    |
| 694 |   | UHRF1    |
| 695 |   | SH3BGRL3 |
| 696 |   | PLEC     |
| 697 |   | HSPB6    |
| 698 |   | TM9SF3   |
| 699 |   | COL12A1  |
| 700 |   | ASCC3    |
| 701 |   | TRIOBP   |
| 702 |   | BPNT2    |
| 703 |   | POLDIP3  |
| 704 |   | EEF1B2   |
| 705 |   | ELP1     |
| 706 |   | AP2B1    |
| 707 |   | PSMD3    |
| 708 |   | FTL      |
| 709 |   | SEC23B   |
| 710 |   | AFAP1    |
| 711 |   | HNRNPA0  |
| 712 |   | PDCD11   |
| 713 |   | STRN4    |

|     | A | B       |
|-----|---|---------|
| 714 |   | SEC22B  |
| 715 |   | EEF1G   |
| 716 |   | ACOX1   |
| 717 |   | MKI67   |
| 718 |   | PCYOX1  |
| 719 |   | PDIA4   |
| 720 |   | ACLY    |
| 721 |   | PPP2CA  |
| 722 |   | RABGAP1 |
| 723 |   | MDH1    |
| 724 |   | TUBGCP2 |
| 725 |   | TNPO3   |
| 726 |   | PSMA4   |
| 727 |   | H4C1    |
| 728 |   | PRPS1   |
| 729 |   | PARP1   |
| 730 |   | GFPT2   |
| 731 |   | ACSL3   |
| 732 |   | SBDS    |
| 733 |   | NAGK    |
| 734 |   | GATD1   |
| 735 |   | NME2    |
| 736 |   | LOX     |
| 737 |   | AKAP13  |
| 738 |   | TCERG1  |
| 739 |   | EIF2S1  |
| 740 |   | SARS1   |
| 741 |   | CETN2   |
| 742 |   | APRT    |
| 743 |   | ATP5F1B |
| 744 |   | SNTB2   |
| 745 |   | VASP    |
| 746 |   | PPM1A   |
| 747 |   | GALNT1  |
| 748 |   | CHORDC1 |
| 749 |   | PPM1G   |
| 750 |   | KPNB1   |
| 751 |   | STT3A   |
| 752 |   | LARP7   |
| 753 |   | ALYREF  |
| 754 |   | NUP98   |
| 755 |   | STT3B   |



|     | A | B        |
|-----|---|----------|
| 756 |   | TAGLN    |
| 757 |   | SRRM2    |
| 758 |   | CDK4     |
| 759 |   | CIAO1    |
| 760 |   | NDUFA4   |
| 761 |   | MPDU1    |
| 762 |   | SLIRP    |
| 763 |   | NUDT5    |
| 764 |   | PPP1R12A |
| 765 |   | SYNCRIP  |
| 766 |   | SON      |
| 767 |   | RANGAP1  |
| 768 |   | GOLGA4   |
| 769 |   | WDR61    |
| 770 |   | GBP1     |
| 771 |   | ZC3HAV1  |
| 772 |   | PDIA5    |
| 773 |   | MAGED2   |
| 774 |   | SNRNP40  |
| 775 |   | EMC1     |
| 776 |   | NFKB1    |
| 777 |   | SF3A1    |
| 778 |   | SNU13    |
| 779 |   | AP1G1    |
| 780 |   | NUP214   |
| 781 |   | CBS      |
| 782 |   | NUP62    |
| 783 |   | DLST     |
| 784 |   | RAB3GAP1 |
| 785 |   | DSTN     |
| 786 |   | SSR3     |
| 787 |   | COPA     |
| 788 |   | VAT1     |
| 789 |   | TAX1BP3  |
| 790 |   | CDK12    |
| 791 |   | RIC8A    |
| 792 |   | PSIP1    |
| 793 |   | TGFB111  |
| 794 |   | PTPN12   |
| 795 |   | ELP2     |
| 796 |   | CSNK2A2  |
| 797 |   | KPNA6    |

|     | A | B        |
|-----|---|----------|
| 798 |   | VDAC3    |
| 799 |   | TBCD     |
| 800 |   | CLTA     |
| 801 |   | EFTUD2   |
| 802 |   | ARHGEF2  |
| 803 |   | PPIB     |
| 804 |   | TPP2     |
| 805 |   | PSMD6    |
| 806 |   | TNPO1    |
| 807 |   | PAFAH1B2 |
| 808 |   | FXR1     |
| 809 |   | MAOA     |
| 810 |   | SH2D4A   |
| 811 |   | DDB1     |
| 812 |   | CYP51A1  |
| 813 |   | IPO5     |
| 814 |   | TRIM56   |
| 815 |   | PGM2     |
| 816 |   | CTTN     |
| 817 |   | GTF2F1   |
| 818 |   | SMC2     |
| 819 |   | AKR1A1   |
| 820 |   | IGF2R    |
| 821 |   | GALNT2   |
| 822 |   | GPD2     |
| 823 |   | PFKM     |
| 824 |   | SH3GL1   |
| 825 |   | POLR1A   |
| 826 |   | GRHPR    |
| 827 |   | MYDGF    |
| 828 |   | NUP160   |
| 829 |   | UQCRB    |
| 830 |   | FH       |
| 831 |   | PSMA6    |
| 832 |   | RANBP2   |
| 833 |   | U2SURP   |
| 834 |   | GOLGA3   |
| 835 |   | HDGFL2   |
| 836 |   | YKT6     |
| 837 |   | NTMT1    |
| 838 |   | H6PD     |
| 839 |   | HSPB1    |

|     | A | B        |
|-----|---|----------|
| 840 |   | DDT      |
| 841 |   | VPS4B    |
| 842 |   | NUP107   |
| 843 |   | UTP14A   |
| 844 |   | DYNC1LI1 |
| 845 |   | ASPSCR1  |
| 846 |   | DRG2     |
| 847 |   | NCAPH    |
| 848 |   | JPT2     |
| 849 |   | BAZ1A    |
| 850 |   | SLK      |
| 851 |   | ABCF2    |
| 852 |   | HPRT1    |
| 853 |   | ABCF1    |
| 854 |   | DPYD     |
| 855 |   | SEPTIN9  |
| 856 |   | ARMT1    |
| 857 |   | CPPED1   |
| 858 |   | POGLUT2  |
| 859 |   | NARS1    |
| 860 |   | SRSF7    |
| 861 |   | FBL      |
| 862 |   | SCRN1    |
| 863 |   | S100A16  |
| 864 |   | CHD4     |
| 865 |   | EIF3F    |
| 866 |   | CSTB     |
| 867 |   | RPS3     |
| 868 |   | PEBP1    |
| 869 |   | MYO1B    |
| 870 |   | RAI14    |
| 871 |   | GLS      |
| 872 |   | NCBP1    |
| 873 |   | GNPNAT1  |
| 874 |   | MCM5     |
| 875 |   | CACYBP   |
| 876 |   | PDXDC1   |
| 877 |   | BAX      |
| 878 |   | SUMF2    |
| 879 |   | RTN3     |
| 880 |   | TOMM40   |
| 881 |   | RPL13    |

|     | A | B       |
|-----|---|---------|
| 882 |   | PCBP2   |
| 883 |   | DPP3    |
| 884 |   | GATAD2A |
| 885 |   | WDR82   |
| 886 |   | MTREX   |
| 887 |   | TXNDC9  |
| 888 |   | PPP6C   |
| 889 |   | PSMB7   |
| 890 |   | MOB4    |
| 891 |   | LBR     |
| 892 |   | PSMA5   |
| 893 |   | DERA    |
| 894 |   | CHP1    |
| 895 |   | PCMT1   |
| 896 |   | DNAAF5  |
| 897 |   | FEN1    |
| 898 |   | PML     |
| 899 |   | TFG     |
| 900 |   | RBM8A   |
| 901 |   | AP1M1   |
| 902 |   | MKLN1   |
| 903 |   | P4HA2   |
| 904 |   | LMNB2   |
| 905 |   | USP9X   |
| 906 |   | BRCC3   |
| 907 |   | TMEM263 |
| 908 |   | PDIA3   |
| 909 |   | AKAP2   |
| 910 |   | NPM1    |
| 911 |   | SCYL1   |
| 912 |   | H2AC20  |
| 913 |   | WDHD1   |
| 914 |   | TRIP12  |
| 915 |   | SOD2    |
| 916 |   | UACA    |
| 917 |   | UPF1    |
| 918 |   | TBL3    |
| 919 |   | TM9SF4  |
| 920 |   | MCM7    |
| 921 |   | ALDH1A1 |
| 922 |   | GAPVD1  |
| 923 |   | CALR    |

|     | A | B         |
|-----|---|-----------|
| 924 |   | PDHX      |
| 925 |   | SLTM      |
| 926 |   | RPS8      |
| 927 |   | CKAP4     |
| 928 |   | GON7      |
| 929 |   | HNRNPA2B1 |
| 930 |   | MAP7D1    |
| 931 |   | NDUFS3    |
| 932 |   | COLGALT1  |
| 933 |   | LSM2      |
| 934 |   | MYH10     |
| 935 |   | ATP5PD    |
| 936 |   | LTA4H     |
| 937 |   | METAP2    |
| 938 |   | MAT2A     |
| 939 |   | PGM3      |
| 940 |   | HSPA5     |
| 941 |   | PSMD8     |
| 942 |   | HSP90B1   |
| 943 |   | BUB3      |
| 944 |   | COL5A1    |
| 945 |   | ASPH      |
| 946 |   | FTSJ3     |
| 947 |   | SNRPN     |
| 948 |   | SH3BGRL   |
| 949 |   | TXN2      |
| 950 |   | CSRP1     |
| 951 |   | UTP18     |
| 952 |   | MCM2      |
| 953 |   | AP2S1     |
| 954 |   | NOMO2     |
| 955 |   | SMN1      |
| 956 |   | USO1      |
| 957 |   | AHNAK     |
| 958 |   | CALU      |
| 959 |   | FLII      |
| 960 |   | ASF1B     |
| 961 |   | CCT6A     |
| 962 |   | HERC1     |
| 963 |   | VPS26A    |
| 964 |   | DNAJB4    |
| 965 |   | AIFM1     |

|      | A | B        |
|------|---|----------|
| 966  |   | ATIC     |
| 967  |   | BPNT1    |
| 968  |   | PDHB     |
| 969  |   | PSMD1    |
| 970  |   | HSPD1    |
| 971  |   | ZYX      |
| 972  |   | PC       |
| 973  |   | CENPV    |
| 974  |   | NUCB1    |
| 975  |   | DDX52    |
| 976  |   | P3H1     |
| 977  |   | MVP      |
| 978  |   | COPB1    |
| 979  |   | PITRM1   |
| 980  |   | PTPN23   |
| 981  |   | NRDC     |
| 982  |   | DARS1    |
| 983  |   | GTF2I    |
| 984  |   | UQCRC2   |
| 985  |   | UBA6     |
| 986  |   | ALDH18A1 |
| 987  |   | MACF1    |
| 988  |   | ATXN10   |
| 989  |   | IDH2     |
| 990  |   | PARK7    |
| 991  |   | EIF2AK2  |
| 992  |   | TOMM70   |
| 993  |   | MRC2     |
| 994  |   | NOP58    |
| 995  |   | ACAA2    |
| 996  |   | VIM      |
| 997  |   | HSPH1    |
| 998  |   | LSM5     |
| 999  |   | PXN      |
| 1000 |   | KLC1     |
| 1001 |   | TBL2     |
| 1002 |   | RPN1     |
| 1003 |   | LRPPRC   |
| 1004 |   | NUMA1    |
| 1005 |   | NQO1     |
| 1006 |   | NSUN2    |
| 1007 |   | STIP1    |

|      | A | B        |
|------|---|----------|
| 1008 |   | PRPF8    |
| 1009 |   | MTDH     |
| 1010 |   | RAD50    |
| 1011 |   | RCN3     |
| 1012 |   | PCNA     |
| 1013 |   | PFN2     |
| 1014 |   | COPG1    |
| 1015 |   | HNRNPUL1 |
| 1016 |   | IMPDH2   |
| 1017 |   | FARSB    |
| 1018 |   | AASS     |
| 1019 |   | PSME1    |
| 1020 |   | TGM2     |
| 1021 |   | PTMA     |
| 1022 |   | UBE2L3   |
| 1023 |   | STRAP    |
| 1024 |   | PLAA     |
| 1025 |   | MEST     |
| 1026 |   | EIF1     |
| 1027 |   | RPSA     |
| 1028 |   | HYOU1    |
| 1029 |   | PSMB3    |
| 1030 |   | SAFB2    |
| 1031 |   | EPS8     |
| 1032 |   | DAP      |
| 1033 |   | HSPA4    |
| 1034 |   | DNAJB11  |
| 1035 |   | DCTN2    |
| 1036 |   | SAFB     |
| 1037 |   | SRM      |
| 1038 |   | RCN2     |
| 1039 |   | HK2      |
| 1040 |   | LOXL2    |
| 1041 |   | CNN3     |
| 1042 |   | PTPN1    |
| 1043 |   | EIF4G2   |
| 1044 |   | SET      |
| 1045 |   | TWF1     |
| 1046 |   | TUFM     |
| 1047 |   | LGALS1   |
| 1048 |   | USP7     |
| 1049 |   | USP14    |

|      | A | B        |
|------|---|----------|
| 1050 |   | UCHL1    |
| 1051 |   | FLNC     |
| 1052 |   | RPS15A   |
| 1053 |   | DTYMK    |
| 1054 |   | CHCHD2   |
| 1055 |   | PDLIM1   |
| 1056 |   | NUCB2    |
| 1057 |   | AKAP12   |
| 1058 |   | ERP44    |
| 1059 |   | AK2      |
| 1060 |   | DDX17    |
| 1061 |   | TIAL1    |
| 1062 |   | AARSD1   |
| 1063 |   | CEBPZ    |
| 1064 |   | TRNT1    |
| 1065 |   | DECR1    |
| 1066 |   | TMEM43   |
| 1067 |   | CHCHD3   |
| 1068 |   | PSMD11   |
| 1069 |   | TRA2B    |
| 1070 |   | CRYBG1   |
| 1071 |   | AP3D1    |
| 1072 |   | DCTPP1   |
| 1073 |   | PON2     |
| 1074 |   | PLIN3    |
| 1075 |   | UAP1     |
| 1076 |   | TACO1    |
| 1077 |   | LIMA1    |
| 1078 |   | HEBP1    |
| 1079 |   | HARS1    |
| 1080 |   | GCN1     |
| 1081 |   | RFC5     |
| 1082 |   | CYC1     |
| 1083 |   | SERBP1   |
| 1084 |   | SPATS2L  |
| 1085 |   | ACO2     |
| 1086 |   | SUN2     |
| 1087 |   | RAP1GDS1 |
| 1088 |   | SRP68    |
| 1089 |   | CUL2     |
| 1090 |   | PPIL4    |
| 1091 |   | EIF6     |



|      | A | B        |
|------|---|----------|
| 1092 |   | ATAD3A   |
| 1093 |   | PPP2R2A  |
| 1094 |   | TXNDC12  |
| 1095 |   | NOP56    |
| 1096 |   | TRIP13   |
| 1097 |   | GARS1    |
| 1098 |   | BOP1     |
| 1099 |   | DRG1     |
| 1100 |   | P4HB     |
| 1101 |   | RAB3GAP2 |
| 1102 |   | SEC16A   |
| 1103 |   | SRPRA    |
| 1104 |   | EIF3H    |
| 1105 |   | PRKAR2A  |
| 1106 |   | CAPN2    |
| 1107 |   | HNRNPD   |
| 1108 |   | AIMP1    |
| 1109 |   | FBN2     |
| 1110 |   | SNX6     |
| 1111 |   | EIF2B2   |
| 1112 |   | CLASP2   |
| 1113 |   | PDLIM5   |
| 1114 |   | ATP5MD   |
| 1115 |   | TP53BP1  |
| 1116 |   | RUVBL2   |
| 1117 |   | SSRP1    |
| 1118 |   | USP5     |
| 1119 |   | SEPTIN11 |
| 1120 |   | ECPAS    |
| 1121 |   | KPNA3    |
| 1122 |   | EWSR1    |
| 1123 |   | H3-2     |
| 1124 |   | ECI2     |
| 1125 |   | CSE1L    |
| 1126 |   | ARHGEF1  |
| 1127 |   | OGDH     |
| 1128 |   | CSNK2A1  |
| 1129 |   | PRPF6    |
| 1130 |   | FHL2     |
| 1131 |   | FUBP1    |
| 1132 |   | GBE1     |
| 1133 |   | LAMC1    |

|      | A | B         |
|------|---|-----------|
| 1134 |   | RPL9      |
| 1135 |   | DNMT1     |
| 1136 |   | YLPM1     |
| 1137 |   | XPO1      |
| 1138 |   | EIF3A     |
| 1139 |   | EMD       |
| 1140 |   | RNPEP     |
| 1141 |   | GART      |
| 1142 |   | MTAP      |
| 1143 |   | COPS2     |
| 1144 |   | ACTN4     |
| 1145 |   | PAICS     |
| 1146 |   | KIF5B     |
| 1147 |   | ATP6V1B2  |
| 1148 |   | DBN1      |
| 1149 |   | MOGS      |
| 1150 |   | IFI16     |
| 1151 |   | SPTBN1    |
| 1152 |   | PDS5A     |
| 1153 |   | DPYSL3    |
| 1154 |   | ARPC5     |
| 1155 |   | EIF3D     |
| 1156 |   | COPS4     |
| 1157 |   | PYCR1     |
| 1158 |   | CEP170    |
| 1159 |   | DNAJC3    |
| 1160 |   | WDR6      |
| 1161 |   | PPME1     |
| 1162 |   | FAM120A   |
| 1163 |   | SND1      |
| 1164 |   | SPTAN1    |
| 1165 |   | SEC23A    |
| 1166 |   | GABARAPL2 |
| 1167 |   | IPO9      |
| 1168 |   | RPN2      |
| 1169 |   | NIBAN2    |
| 1170 |   | HNRNPC    |
| 1171 |   | RCN1      |
| 1172 |   | HADHA     |
| 1173 |   | KTN1      |
| 1174 |   | TRIM28    |
| 1175 |   | SFPQ      |

|      | A | B         |
|------|---|-----------|
| 1176 |   | COPB2     |
| 1177 |   | ARCN1     |
| 1178 |   | NDUFS6    |
| 1179 |   | EIF3K     |
| 1180 |   | MAPK1IP1L |
| 1181 |   | MATR3     |
| 1182 |   | HSD17B10  |
| 1183 |   | PUF60     |
| 1184 |   | RPS16     |
| 1185 |   | SLC25A5   |
| 1186 |   | RBM3      |
| 1187 |   | SLC25A3   |
| 1188 |   | SEC13     |
| 1189 |   | SDF4      |
| 1190 |   | LRRFIP1   |
| 1191 |   | SERPINH1  |
| 1192 |   | EIF2B3    |
| 1193 |   | PRMT5     |
| 1194 |   | DDX39B    |
| 1195 |   | NUP37     |
| 1196 |   | TXNRD1    |
| 1197 |   | HNRNPF    |
| 1198 |   | PLOD1     |
| 1199 |   | EIF2B1    |
| 1200 |   | ETFA      |
| 1201 |   | HAT1      |
| 1202 |   | ACP1      |
| 1203 |   | SARS2     |
| 1204 |   | HMGB2     |
| 1205 |   | SPART     |
| 1206 |   | RPL26     |
| 1207 |   | PLS3      |
| 1208 |   | MT2A      |
| 1209 |   | GORASP2   |
| 1210 |   | MCM6      |
| 1211 |   | DDAH1     |
| 1212 |   | KPNA1     |
| 1213 |   | TKT       |
| 1214 |   | HSDL2     |
| 1215 |   | COPE      |
| 1216 |   | CTSB      |
| 1217 |   | PSMD10    |

|      | A | B        |
|------|---|----------|
| 1218 |   | NUFIP2   |
| 1219 |   | CALD1    |
| 1220 |   | RRP9     |
| 1221 |   | MAP4     |
| 1222 |   | MAP1B    |
| 1223 |   | TJP1     |
| 1224 |   | DDX3X    |
| 1225 |   | DDX6     |
| 1226 |   | RBBP6    |
| 1227 |   | HNRNPM   |
| 1228 |   | RPL23    |
| 1229 |   | HSPA2    |
| 1230 |   | SMC3     |
| 1231 |   | SNRNP200 |
| 1232 |   | EIF3B    |
| 1233 |   | FLNB     |
| 1234 |   | DDX19A   |
| 1235 |   | NDUFA5   |
| 1236 |   | HNRNPA1  |
| 1237 |   | RPS25    |
| 1238 |   | AHSA1    |
| 1239 |   | ACBD3    |
| 1240 |   | HNRNPH1  |
| 1241 |   | RPL12    |
| 1242 |   | DNAJA1   |
| 1243 |   | UGDH     |
| 1244 |   | RPS26    |
| 1245 |   | RPS5     |
| 1246 |   | RPL19    |
| 1247 |   | RPS2     |
| 1248 |   | SHMT2    |
| 1249 |   | MAPRE1   |
| 1250 |   | PHF6     |
| 1251 |   | SCAMP3   |
| 1252 |   | LASP1    |
| 1253 |   | EIF3L    |
| 1254 |   | EIF3E    |
| 1255 |   | TXNL1    |
| 1256 |   | UBE2V1   |
| 1257 |   | EIF5A    |
| 1258 |   | MCM3     |
| 1259 |   | PSMD2    |

|      | A | B        |
|------|---|----------|
| 1260 |   | RPL21    |
| 1261 |   | FKBP5    |
| 1262 |   | TOP1     |
| 1263 |   | DNAJA2   |
| 1264 |   | EEF1D    |
| 1265 |   | AGPS     |
| 1266 |   | DDX21    |
| 1267 |   | CMPK1    |
| 1268 |   | EIF5     |
| 1269 |   | TPM1     |
| 1270 |   | TMOD3    |
| 1271 |   | FUBP3    |
| 1272 |   | HELZ     |
| 1273 |   | HDLBP    |
| 1274 |   | LETM1    |
| 1275 |   | STUB1    |
| 1276 |   | RPL18    |
| 1277 |   | EIF2S3   |
| 1278 |   | UBAP2    |
| 1279 |   | CISD2    |
| 1280 |   | HSD17B12 |
| 1281 |   | SQOR     |
| 1282 |   | RBM25    |
| 1283 |   | RPS9     |
| 1284 |   | RACK1    |
| 1285 |   | BAG3     |
| 1286 |   | RBM12    |
| 1287 |   | IGFBP7   |
| 1288 |   | RARS1    |
| 1289 |   | PRDX4    |
| 1290 |   | DDOST    |
| 1291 |   | MYBBP1A  |
| 1292 |   | MCM4     |
| 1293 |   | NDUFV1   |
| 1294 |   | MYL12A   |
| 1295 |   | UBA2     |
| 1296 |   | DDRGK1   |
| 1297 |   | HSPA9    |
| 1298 |   | RPS18    |
| 1299 |   | VAPA     |
| 1300 |   | PAK2     |
| 1301 |   | XRCC6    |

|      | A | B       |
|------|---|---------|
| 1302 |   | GLUD1   |
| 1303 |   | ATP5PB  |
| 1304 |   | PALLD   |
| 1305 |   | TPD52L2 |
| 1306 |   | KARS1   |
| 1307 |   | TAF15   |
| 1308 |   | LRRC59  |
| 1309 |   | FAM98A  |
| 1310 |   | ADAR    |
| 1311 |   | THRAP3  |
| 1312 |   | RPL7A   |
| 1313 |   | STOML2  |
| 1314 |   | RPL7    |
| 1315 |   | NES     |
| 1316 |   | VDAC1   |
| 1317 |   | RPL30   |
| 1318 |   | VARS1   |
| 1319 |   | SNRNP70 |
| 1320 |   | SNRPD2  |
| 1321 |   | ATL3    |
| 1322 |   | FKBP4   |
| 1323 |   | DDX1    |
| 1324 |   | KHSRP   |
| 1325 |   | RPL36AL |
| 1326 |   | UBE2I   |
| 1327 |   | LPP     |
| 1328 |   | ARL3    |
| 1329 |   | RANBP1  |
| 1330 |   | DHX9    |
| 1331 |   | RPS11   |
| 1332 |   | SF3B1   |
| 1333 |   | ELAVL1  |
| 1334 |   | EIF3I   |
| 1335 |   | SSB     |
| 1336 |   | LMNA    |
| 1337 |   | RPLP0   |
| 1338 |   | ATP5PO  |
| 1339 |   | PSMC4   |
| 1340 |   | KHDRBS1 |
| 1341 |   | GFPT1   |
| 1342 |   | RBMX    |
| 1343 |   | RPL4    |

|      | A | B       |
|------|---|---------|
| 1344 |   | CTPS1   |
| 1345 |   | HNRNPU  |
| 1346 |   | SF3B2   |
| 1347 |   | SUGT1   |
| 1348 |   | RPS6    |
| 1349 |   | RPS19   |
| 1350 |   | ABCA11P |
| 1351 |   | NONO    |
| 1352 |   | VDAC2   |
| 1353 |   | RPL11   |
| 1354 |   | GRPEL1  |
| 1355 |   | PITPNB  |
| 1356 |   | RTCB    |
| 1357 |   | DNAJC7  |
| 1358 |   | CNBP    |
| 1359 |   | DHX15   |
| 1360 |   | NASP    |
| 1361 |   | ATOX1   |
| 1362 |   | NCL     |
| 1363 |   | ARPC1A  |
| 1364 |   | HSPE1   |
| 1365 |   | PRPF19  |
| 1366 |   | PTMS    |
| 1367 |   | GMPS    |
| 1368 |   | TOMM22  |
| 1369 |   | NUP205  |
| 1370 |   | RPL5    |
| 1371 |   | CBX3    |
| 1372 |   | G3BP1   |
| 1373 |   | TMPO    |
| 1374 |   | DDX18   |
| 1375 |   | PLOD2   |
| 1376 |   | ERP29   |
| 1377 |   | RPS20   |
| 1378 |   | SEC24D  |
| 1379 |   | RRBP1   |
| 1380 |   | NOLC1   |
| 1381 |   | WARS1   |
| 1382 |   | PPA1    |
| 1383 |   | TUBB6   |
| 1384 |   | EIF4B   |
| 1385 |   | ENAH    |

|      | A | B       |
|------|---|---------|
| 1386 |   | RPL3    |
| 1387 |   | FKBP10  |
| 1388 |   | PABPC1  |
| 1389 |   | SNRPD3  |
| 1390 |   | ACAT1   |
| 1391 |   | RPS17   |
| 1392 |   | RPS14   |
| 1393 |   | ABCE1   |
| 1394 |   | DPYSL2  |
| 1395 |   | LMNB1   |
| 1396 |   | HNRNPK  |
| 1397 |   | RPL23A  |
| 1398 |   | YBX1    |
| 1399 |   | RPL10A  |
| 1400 |   | PRMT1   |
| 1401 |   | H1-2    |
| 1402 |   | CLINT1  |
| 1403 |   | RPL15   |
| 1404 |   | RPL27   |
| 1405 |   | RPS27   |
| 1406 |   | RPL6    |
| 1407 |   | HNRNPA3 |
| 1408 |   | RPL13A  |
| 1409 |   | G3BP2   |
| 1410 |   | RPS3A   |
| 1411 |   | RPLP2   |



**Supplementary Table 5. Protein name and number of interactions in PPI network**

| Protein name | Number of interactions |
|--------------|------------------------|
| P04406       | 538                    |
| P62987       | 519                    |
| P11142       | 439                    |
| P07900       | 433                    |
| Q99459       | 390                    |
| P24928       | 386                    |
| P06493       | 377                    |
| P13639       | 350                    |
| P34932       | 347                    |
| P55769       | 345                    |
| P30876       | 344                    |
| P23396       | 343                    |
| P07814       | 337                    |
| P60709       | 335                    |
| P09651       | 325                    |
| Q09161       | 313                    |
| P30153       | 309                    |
| P05388       | 309                    |
| P08865       | 308                    |
| P22087       | 307                    |
| Q15029       | 307                    |
| P28482       | 306                    |
| P60866       | 306                    |
| P62753       | 301                    |
| P36578       | 300                    |
| P15880       | 299                    |
| P63244       | 299                    |
| P78371       | 296                    |
| P62913       | 295                    |
| P68104       | 293                    |
| Q09472       | 290                    |
| P62316       | 288                    |
| P02751       | 288                    |
| P42285       | 285                    |
| P61247       | 285                    |
| P07910       | 285                    |
| P62249       | 284                    |
| P46777       | 284                    |
| O43143       | 283                    |
| P62277       | 283                    |
| P12931       | 282                    |
| P67775       | 282                    |
| P22626       | 281                    |
| O00567       | 281                    |
| P62263       | 281                    |
| P62280       | 280                    |
| Q9Y265       | 279                    |
| P39023       | 279                    |
| P46782       | 278                    |
| Q9NX24       | 276                    |
| P46781       | 275                    |
| P62306       | 273                    |
| P32969       | 273                    |
| P62829       | 272                    |
| P60484       | 271                    |
| P62424       | 271                    |
| P62244       | 270                    |
| P18124       | 270                    |
| P99999       | 269                    |
| Q07955       | 268                    |
| P62241       | 268                    |
| O14980       | 268                    |

|        |     |
|--------|-----|
| P62269 | 268 |
| Q02878 | 267 |
| Q9UMS4 | 265 |
| P48643 | 263 |
| P30050 | 263 |
| P62750 | 263 |
| P62861 | 262 |
| Q99832 | 260 |
| P50991 | 259 |
| P14635 | 258 |
| P61978 | 257 |
| Q15843 | 256 |
| P26641 | 256 |
| P22102 | 256 |
| P25788 | 255 |
| P11940 | 254 |
| Q08211 | 254 |
| P42677 | 254 |
| P60842 | 252 |
| P50990 | 251 |
| P61313 | 251 |
| P40429 | 251 |
| Q15717 | 250 |
| P61353 | 250 |
| P61254 | 249 |
| P62318 | 248 |
| Q13838 | 248 |
| P55072 | 247 |
| Q9Y2X3 | 246 |
| P60174 | 242 |
| P26373 | 242 |
| P62081 | 242 |
| Q9Y5S9 | 242 |
| P55884 | 241 |
| P62877 | 240 |
| P42766 | 240 |
| Q96GD4 | 240 |
| P62906 | 240 |
| P62273 | 240 |
| P62841 | 240 |
| P05412 | 239 |
| P62888 | 238 |
| P39019 | 238 |
| P25705 | 236 |
| P11021 | 235 |
| P49368 | 234 |
| P84098 | 233 |
| P25786 | 233 |
| P24941 | 232 |
| Q9UKD2 | 232 |
| P54577 | 229 |
| P25787 | 228 |
| P08238 | 228 |
| O14965 | 226 |
| P60900 | 226 |
| P40227 | 226 |
| Q99460 | 226 |
| P38646 | 225 |
| Q9NV31 | 225 |
| P62851 | 225 |
| O75533 | 224 |
| P12004 | 224 |
| P53803 | 223 |
| P49792 | 222 |
| P61221 | 222 |

|        |     |
|--------|-----|
| Q12888 | 222 |
| Q9UNX3 | 222 |
| P28066 | 221 |
| P17987 | 221 |
| P10809 | 221 |
| P43686 | 220 |
| O14818 | 220 |
| Q07020 | 220 |
| P05198 | 219 |
| P20248 | 219 |
| P62195 | 219 |
| P05387 | 219 |
| P49411 | 218 |
| Q13347 | 218 |
| P26368 | 217 |
| P62854 | 217 |
| P19338 | 216 |
| P14618 | 216 |
| P36954 | 215 |
| P52435 | 215 |
| Q8WWY3 | 215 |
| P67809 | 215 |
| P46778 | 214 |
| Q5TEC6 | 213 |
| Q14974 | 212 |
| P27635 | 212 |
| P63165 | 210 |
| Q6P2Q9 | 210 |
| P25789 | 209 |
| Q14690 | 209 |
| P62495 | 208 |
| Q86V81 | 208 |
| Q14204 | 207 |
| P83731 | 206 |
| P16104 | 206 |
| Q15366 | 205 |
| P63261 | 205 |
| P06748 | 204 |
| P31943 | 204 |
| P52272 | 203 |
| P63279 | 203 |
| O95478 | 203 |
| Q8N257 | 202 |
| P84103 | 202 |
| Q13200 | 201 |
| P04179 | 201 |
| P63208 | 200 |
| O60566 | 199 |
| P23588 | 198 |
| Q96EB6 | 197 |
| O15160 | 197 |
| P61619 | 196 |
| Q00839 | 196 |
| P61088 | 196 |
| Q9Y230 | 196 |
| O95602 | 194 |
| O15234 | 194 |
| P41091 | 193 |
| P35268 | 193 |
| Q06609 | 193 |
| Q92905 | 192 |
| P07237 | 191 |
| P08708 | 191 |
| O60506 | 191 |
| P14866 | 190 |

|        |     |
|--------|-----|
| O43818 | 190 |
| P62995 | 190 |
| O14757 | 189 |
| P62333 | 189 |
| Q14103 | 188 |
| Q14152 | 188 |
| P24534 | 188 |
| O00231 | 187 |
| P82675 | 187 |
| Q92900 | 187 |
| P14625 | 186 |
| O75643 | 185 |
| Q16777 | 185 |
| P47914 | 185 |
| P51991 | 184 |
| Q15819 | 184 |
| Q92769 | 184 |
| P08621 | 184 |
| P00441 | 183 |
| Q9HCS7 | 183 |
| P35269 | 183 |
| Q16698 | 182 |
| P06733 | 182 |
| Q9BYD3 | 182 |
| P56192 | 182 |
| Q16629 | 182 |
| P04114 | 181 |
| P06576 | 181 |
| P54886 | 181 |
| P49915 | 181 |
| Q15910 | 180 |
| O43684 | 180 |
| P09012 | 179 |
| Q71UM5 | 179 |
| P63241 | 179 |
| Q14240 | 178 |
| Q15459 | 177 |
| P11388 | 177 |
| Q14137 | 176 |
| P04843 | 175 |
| O14561 | 175 |
| P82912 | 174 |
| Q00610 | 174 |
| Q9Y399 | 173 |
| Q9P015 | 172 |
| P49756 | 172 |
| P63167 | 172 |
| Q13243 | 172 |
| Q9P210 | 170 |
| P12270 | 170 |
| Q13242 | 169 |
| Q13895 | 169 |
| Q92620 | 169 |
| P00558 | 169 |
| Q9Y4Z0 | 169 |
| P33993 | 168 |
| P47813 | 168 |
| Q96IZ7 | 168 |
| Q15046 | 167 |
| Q969Q0 | 167 |
| P54725 | 167 |
| O00148 | 166 |
| P38936 | 166 |
| P60228 | 165 |
| Q9NV06 | 165 |

|        |     |
|--------|-----|
| O43809 | 164 |
| Q15149 | 164 |
| O00232 | 164 |
| P61160 | 164 |
| Q92841 | 164 |
| O00303 | 164 |
| P51003 | 163 |
| Q9Y5J1 | 163 |
| P61604 | 163 |
| Q9NVP1 | 163 |
| P17812 | 163 |
| O75400 | 163 |
| P27824 | 162 |
| Q9BWJ5 | 162 |
| P56537 | 162 |
| Q8NI36 | 162 |
| Q99471 | 162 |
| P62491 | 161 |
| Q9NRX1 | 161 |
| Q02224 | 161 |
| P39748 | 161 |
| P09874 | 161 |
| Q15397 | 161 |
| P20618 | 160 |
| O94913 | 160 |
| O15392 | 160 |
| O43683 | 159 |
| Q13151 | 159 |
| Q13409 | 159 |
| P63162 | 159 |
| Q99497 | 159 |
| P68400 | 158 |
| P62714 | 158 |
| Q99436 | 158 |
| Q13435 | 158 |
| P33240 | 158 |
| P22392 | 158 |
| P52597 | 158 |
| Q7L2H7 | 157 |
| Q12788 | 157 |
| Q07666 | 156 |
| Q9UQE7 | 156 |
| Q13610 | 156 |
| P25205 | 156 |
| P57740 | 155 |
| Q9Y3B7 | 155 |
| P62136 | 155 |
| Q6UN15 | 155 |
| P38159 | 155 |
| O00571 | 155 |
| P39656 | 155 |
| P49736 | 154 |
| Q12996 | 154 |
| P49720 | 154 |
| P19838 | 153 |
| O95777 | 153 |
| Q08170 | 153 |
| P55735 | 153 |
| Q7L014 | 153 |
| Q8NFH4 | 153 |
| Q9UNE7 | 152 |
| Q9NR30 | 152 |
| Q15637 | 152 |
| O75390 | 151 |
| O43493 | 151 |

|        |     |
|--------|-----|
| P62312 | 151 |
| P23528 | 151 |
| P09234 | 150 |
| P22314 | 150 |
| Q9H583 | 150 |
| Q9Y333 | 150 |
| Q9NWU5 | 150 |
| Q9UHD9 | 149 |
| P26640 | 149 |
| Q14669 | 149 |
| Q96DI7 | 148 |
| P46087 | 148 |
| P05556 | 148 |
| Q8IY81 | 148 |
| P11802 | 147 |
| Q9UQ35 | 147 |
| Q13206 | 147 |
| Q9BVJ6 | 147 |
| P33992 | 146 |
| P33991 | 146 |
| O94906 | 146 |
| O95391 | 146 |
| Q16531 | 146 |
| P11441 | 146 |
| P48730 | 145 |
| P49721 | 145 |
| Q92989 | 145 |
| Q9Y2R4 | 145 |
| Q9Y266 | 144 |
| P12956 | 144 |
| Q9H5Q4 | 144 |
| P00519 | 144 |
| Q9H173 | 144 |
| Q9Y4Y9 | 144 |
| Q13601 | 143 |
| P04844 | 143 |
| P27694 | 143 |
| P40337 | 143 |
| Q8WUM0 | 143 |
| O60264 | 143 |
| O14744 | 143 |
| Q9H1A4 | 143 |
| Q13868 | 143 |
| Q16881 | 143 |
| Q9BV38 | 143 |
| P27797 | 142 |
| Q96A35 | 142 |
| P43034 | 142 |
| P02649 | 141 |
| Q9UK45 | 141 |
| P49023 | 141 |
| Q12830 | 141 |
| Q8IYD1 | 141 |
| Q9UNP9 | 141 |
| O15213 | 141 |
| Q9BVP2 | 141 |
| O15371 | 140 |
| Q9NVU7 | 140 |
| P61163 | 140 |
| P31946 | 140 |
| O96019 | 140 |
| Q14738 | 140 |
| Q9UHX1 | 140 |
| P48556 | 139 |
| Q9NQZ2 | 139 |

|        |     |
|--------|-----|
| O43290 | 139 |
| Q92973 | 139 |
| Q13823 | 139 |
| Q99873 | 139 |
| P46199 | 138 |
| O15379 | 138 |
| P68371 | 138 |
| Q14978 | 138 |
| Q99798 | 137 |
| Q8NAV1 | 137 |
| Q9BUQ8 | 137 |
| P52815 | 137 |
| Q9NVN8 | 137 |
| P26358 | 137 |
| Q9BQ67 | 136 |
| P51965 | 136 |
| Q9H9Y2 | 136 |
| O43172 | 136 |
| P01009 | 136 |
| P63151 | 135 |
| P07437 | 135 |
| P35658 | 135 |
| O75874 | 135 |
| Q9UJX3 | 135 |
| P29692 | 135 |
| Q15024 | 134 |
| P02671 | 134 |
| Q9Y3T9 | 134 |
| Q6UX04 | 134 |
| P46060 | 134 |
| P53618 | 133 |
| P82933 | 133 |
| P21796 | 133 |
| P28072 | 133 |
| P08574 | 133 |
| Q14683 | 133 |
| Q05397 | 133 |
| O14802 | 133 |
| P22234 | 133 |
| P47756 | 133 |
| Q5JTH9 | 133 |
| P42336 | 132 |
| P01042 | 132 |
| Q08945 | 132 |
| P04075 | 132 |
| Q68CQ4 | 132 |
| O95479 | 132 |
| P23443 | 131 |
| P78527 | 131 |
| P62993 | 131 |
| P05455 | 131 |
| P02679 | 130 |
| Q14247 | 130 |
| Q9BUJ2 | 130 |
| P28340 | 130 |
| O15372 | 130 |
| Q14008 | 130 |
| P53396 | 129 |
| Q9H0L4 | 129 |
| Q8N684 | 129 |
| Q3B726 | 128 |
| P61158 | 128 |
| O75937 | 128 |
| O43242 | 128 |
| O75947 | 128 |

|        |     |
|--------|-----|
| P61981 | 128 |
| P43243 | 128 |
| P42224 | 128 |
| Q9Y450 | 128 |
| P21333 | 128 |
| P41252 | 128 |
| Q13617 | 128 |
| P55010 | 127 |
| P01024 | 127 |
| Q92747 | 127 |
| Q9BV40 | 127 |
| P48047 | 127 |
| P28070 | 127 |
| P30101 | 127 |
| P61024 | 127 |
| P12268 | 127 |
| P08047 | 127 |
| O95239 | 127 |
| P13010 | 127 |
| Q13561 | 127 |
| Q15172 | 126 |
| P61201 | 126 |
| Q99880 | 126 |
| Q8IWX8 | 126 |
| Q8IX12 | 125 |
| Q03135 | 125 |
| Q15008 | 125 |
| P04792 | 124 |
| O00410 | 124 |
| Q92733 | 124 |
| Q9NRX2 | 124 |
| O95400 | 124 |
| Q7Z6Z7 | 124 |
| Q5T4S7 | 124 |
| Q9GZS1 | 124 |
| P40937 | 124 |
| P01033 | 123 |
| Q9UBQ5 | 123 |
| P15153 | 123 |
| Q8NI77 | 123 |
| O60216 | 123 |
| P00734 | 123 |
| Q8NFH3 | 123 |
| P00338 | 123 |
| Q9NPI6 | 123 |
| Q9UM13 | 123 |
| O00401 | 122 |
| Q9HAU4 | 122 |
| Q14566 | 122 |
| Q9ULW0 | 122 |
| Q14197 | 122 |
| P23246 | 122 |
| P02787 | 122 |
| Q96FJ2 | 122 |
| Q9UNQ2 | 121 |
| Q9NPD3 | 121 |
| Q07864 | 121 |
| Q12769 | 121 |
| Q12904 | 121 |
| P05106 | 121 |
| Q13217 | 121 |
| P35250 | 120 |
| O60828 | 120 |
| Q02218 | 120 |
| P31939 | 120 |



|        |     |
|--------|-----|
| Q8NI27 | 120 |
| Q9Y6G9 | 120 |
| Q9UJX5 | 120 |
| P56282 | 119 |
| P06400 | 119 |
| O43447 | 119 |
| P11717 | 119 |
| P02545 | 119 |
| P16220 | 119 |
| Q9H0H5 | 119 |
| O15042 | 119 |
| Q9Y262 | 119 |
| P61086 | 118 |
| P52907 | 118 |
| O95347 | 118 |
| P31948 | 118 |
| Q8NC51 | 118 |
| O43707 | 117 |
| Q9NVP2 | 117 |
| P19447 | 117 |
| P84022 | 117 |
| Q9BYC9 | 117 |
| P07954 | 117 |
| P62736 | 117 |
| O75419 | 117 |
| P27986 | 117 |
| P40925 | 117 |
| Q9P0M9 | 116 |
| P22695 | 116 |
| Q7KZ85 | 116 |
| Q14457 | 116 |
| Q96GA3 | 116 |
| Q99643 | 116 |
| Q9BQG0 | 116 |
| P11387 | 115 |
| Q9Y3C6 | 115 |
| Q15691 | 115 |
| P02647 | 114 |
| P62805 | 114 |
| P57772 | 114 |
| P20700 | 114 |
| P48444 | 114 |
| P0DPB6 | 114 |
| Q01085 | 114 |
| Q92499 | 114 |
| P37198 | 114 |
| Q9Y2W2 | 113 |
| Q02750 | 113 |
| Q93009 | 113 |
| Q8TBC4 | 113 |
| P18754 | 113 |
| P11413 | 113 |
| Q16186 | 113 |
| P30049 | 112 |
| P34897 | 112 |
| P07355 | 112 |
| P62140 | 112 |
| Q8WUA2 | 111 |
| Q9GZS3 | 111 |
| Q9NUL7 | 111 |
| P12814 | 111 |
| Q8WVK2 | 110 |
| Q9HAV7 | 110 |
| Q16630 | 110 |
| O75376 | 110 |

|        |     |
|--------|-----|
| Q9Y324 | 110 |
| Q92945 | 110 |
| P06744 | 110 |
| O96008 | 110 |
| P13693 | 110 |
| Q9H501 | 109 |
| P09622 | 109 |
| O75694 | 109 |
| Q06830 | 109 |
| Q9UHB9 | 109 |
| Q13813 | 109 |
| P06756 | 108 |
| P51948 | 108 |
| P08514 | 108 |
| P49755 | 108 |
| P20674 | 108 |
| Q9NQ15 | 108 |
| P08240 | 108 |
| O00255 | 108 |
| P30041 | 108 |
| P49642 | 108 |
| Q05193 | 108 |
| P36915 | 108 |
| P07195 | 108 |
| Q96LR5 | 108 |
| P23526 | 107 |
| P50748 | 107 |
| Q9P287 | 107 |
| Q00403 | 107 |
| Q9BYW2 | 107 |
| P17252 | 107 |
| Q9H0U4 | 106 |
| Q2NKX8 | 106 |
| P15311 | 106 |
| Q15084 | 106 |
| P26196 | 106 |
| P52701 | 105 |
| Q9GZV4 | 105 |
| Q8IZL8 | 105 |
| P49458 | 105 |
| P10909 | 105 |
| P12259 | 105 |
| P19367 | 105 |
| Q9Y5M8 | 105 |
| P01137 | 104 |
| Q92890 | 104 |
| P32780 | 104 |
| P51571 | 104 |
| O95782 | 104 |
| Q9Y3B9 | 104 |
| Q9H8H2 | 104 |
| P09496 | 103 |
| Q9UBT2 | 103 |
| P51809 | 103 |
| Q92621 | 103 |
| O14976 | 103 |
| Q9Y3B2 | 103 |
| Q01844 | 103 |
| O15498 | 102 |
| O75489 | 102 |
| Q9UNL2 | 102 |
| O75717 | 102 |
| P28074 | 102 |
| Q8IZT6 | 102 |
| P02765 | 102 |

|               |     |
|---------------|-----|
| P19652        | 102 |
| P30086        | 101 |
| Q9BT78        | 101 |
| P29401        | 101 |
| Q9UJA5        | 100 |
| P27695        | 100 |
| O14579        | 100 |
| Q9P1U0        | 100 |
| P00738;P00739 | 100 |
| P01008        | 100 |
| P36871        | 100 |
| Q07065        | 100 |
| P50570        | 100 |
| O75494        | 100 |
| Q08J23        | 99  |
| Q9UKB1        | 99  |
| P29590        | 99  |
| Q29RF7        | 99  |
| O00499        | 99  |
| Q9UBN7        | 99  |
| P41567        | 99  |
| P63010        | 99  |
| Q03701        | 98  |
| Q15003        | 98  |
| Q96EU6        | 98  |
| P19474        | 98  |
| Q8N442        | 98  |
| P49773        | 98  |
| P37837        | 98  |
| P33552        | 98  |
| P46459        | 98  |
| Q9BY77        | 98  |
| P08575        | 98  |
| Q04837        | 98  |
| Q9NXH9        | 98  |
| Q14807        | 97  |
| Q9H6S0        | 97  |
| O14672        | 97  |
| Q15291        | 97  |
| P00450        | 97  |
| P05362        | 97  |
| Q9Y3Y2        | 97  |
| P41208        | 97  |
| Q9H410        | 97  |
| P31930        | 96  |
| P11177        | 96  |
| P00747        | 96  |
| A0AVT1        | 96  |
| Q06124        | 96  |
| O00391        | 96  |
| Q86XK2        | 96  |
| Q86X12        | 96  |
| P43487        | 96  |
| P07339        | 95  |
| P04049        | 95  |
| O75691        | 95  |
| Q15363        | 95  |
| Q12824        | 95  |
| O95169        | 95  |
| Q9Y678        | 95  |
| Q13404        | 95  |
| Q99996        | 95  |
| P50395        | 95  |
| Q14997        | 95  |
| O60763        | 95  |

|        |    |
|--------|----|
| O75832 | 94 |
| Q07021 | 94 |
| P54578 | 94 |
| O75822 | 94 |
| Q13190 | 94 |
| Q7Z6E9 | 94 |
| O94973 | 94 |
| P48735 | 94 |
| Q9NPE3 | 94 |
| Q14839 | 94 |
| Q01968 | 94 |
| P07741 | 94 |
| P31483 | 94 |
| P61009 | 94 |
| Q99567 | 94 |
| Q92922 | 93 |
| Q00534 | 93 |
| P47755 | 93 |
| P53621 | 93 |
| P24539 | 93 |
| Q96AE4 | 93 |
| P27348 | 93 |
| Q9Y4L1 | 93 |
| Q9Y6A9 | 93 |
| P20645 | 92 |
| Q15645 | 92 |
| P07942 | 92 |
| P02452 | 92 |
| O15145 | 92 |
| P54136 | 92 |
| Q15398 | 92 |
| P55081 | 92 |
| Q15233 | 92 |
| P82979 | 92 |
| P40306 | 92 |
| Q8WVM0 | 92 |
| P62834 | 92 |
| Q13492 | 92 |
| O43663 | 92 |
| Q96B97 | 92 |
| P16284 | 92 |
| P49005 | 92 |
| P23284 | 91 |
| P46736 | 91 |
| P54652 | 91 |
| Q14493 | 91 |
| P56524 | 90 |
| Q15004 | 90 |
| P49959 | 90 |
| P02652 | 90 |
| P45880 | 90 |
| P07948 | 90 |
| O94822 | 90 |
| P02763 | 89 |
| O15047 | 89 |
| P46940 | 89 |
| Q15386 | 89 |
| P52948 | 89 |
| P41250 | 89 |
| Q9NRZ9 | 89 |
| Q9UI30 | 89 |
| Q13889 | 89 |
| P46937 | 89 |
| O14646 | 89 |
| O75379 | 88 |

|        |    |
|--------|----|
| Q16795 | 88 |
| Q9H3R5 | 88 |
| Q8NFH5 | 88 |
| P33176 | 88 |
| P49821 | 88 |
| O75396 | 88 |
| O43264 | 87 |
| P53680 | 87 |
| P54920 | 87 |
| Q07157 | 87 |
| P50213 | 87 |
| P35606 | 87 |
| O76094 | 87 |
| O75306 | 87 |
| P46013 | 87 |
| Q53EZ4 | 87 |
| P20290 | 87 |
| Q13283 | 87 |
| O00233 | 87 |
| Q96T88 | 87 |
| P35579 | 86 |
| P42704 | 86 |
| P49588 | 86 |
| Q9NWX5 | 86 |
| O43181 | 86 |
| Q13177 | 86 |
| Q15021 | 86 |
| P68363 | 86 |
| Q9UGC7 | 86 |
| P06753 | 86 |
| P00813 | 86 |
| Q15181 | 86 |
| P67870 | 86 |
| Q8WVM7 | 86 |
| Q8N2K1 | 86 |
| P0C0L4 | 86 |
| Q9Y4K3 | 86 |
| P78344 | 86 |
| Q92804 | 86 |
| P04004 | 85 |
| Q12931 | 85 |
| O75146 | 85 |
| P33947 | 85 |
| Q15629 | 85 |
| Q92616 | 85 |
| Q9P2K6 | 85 |
| Q9Y618 | 85 |
| Q9Y4C8 | 85 |
| Q13057 | 85 |
| Q9UL46 | 84 |
| P55039 | 84 |
| Q00325 | 84 |
| Q9UK97 | 84 |
| P00505 | 84 |
| Q92466 | 84 |
| Q96PM5 | 84 |
| P78362 | 84 |
| O43709 | 84 |
| Q9NR33 | 84 |
| Q9GZT3 | 84 |
| Q9UI43 | 83 |
| Q9Y248 | 83 |
| P11047 | 83 |
| O15144 | 83 |
| P49327 | 83 |

|        |    |
|--------|----|
| Q8NEZ5 | 83 |
| P35555 | 83 |
| Q9UET6 | 83 |
| Q9NPD8 | 83 |
| P63267 | 83 |
| O43426 | 83 |
| P62937 | 83 |
| O43482 | 82 |
| P49321 | 82 |
| P10606 | 82 |
| O15504 | 82 |
| Q712K3 | 82 |
| P52209 | 82 |
| O15511 | 82 |
| Q8N3Y1 | 82 |
| Q9BVC3 | 82 |
| P60604 | 82 |
| Q7Z2T5 | 82 |
| Q8N3C0 | 82 |
| Q01518 | 82 |
| P56945 | 82 |
| P13804 | 82 |
| Q9H2C0 | 82 |
| Q9NRG9 | 81 |
| Q16401 | 81 |
| P19174 | 81 |
| O94855 | 81 |
| P56199 | 81 |
| Q14680 | 81 |
| P18085 | 81 |
| Q7KZF4 | 81 |
| P28370 | 81 |
| Q9H2K0 | 81 |
| P59998 | 81 |
| Q9BYK8 | 81 |
| P05546 | 80 |
| Q02127 | 80 |
| P49815 | 80 |
| P49257 | 80 |
| P23258 | 80 |
| O15397 | 80 |
| P55060 | 80 |
| Q9ULW3 | 80 |
| P52789 | 80 |
| Q6UXN9 | 80 |
| Q9NVR0 | 80 |
| Q8N6T3 | 80 |
| Q9BQ52 | 80 |
| Q9UGP8 | 80 |
| Q13950 | 80 |
| O15260 | 80 |
| Q96CV9 | 80 |
| P11166 | 80 |
| P08567 | 79 |
| Q8WVB6 | 79 |
| Q9NS91 | 79 |
| O43583 | 79 |
| Q9Y295 | 79 |
| O95613 | 79 |
| Q9NSE4 | 79 |
| P51398 | 79 |
| P05141 | 79 |
| Q9NVZ3 | 79 |
| Q96CB9 | 79 |
| Q13472 | 79 |

|        |    |
|--------|----|
| Q9BXS6 | 79 |
| P30566 | 79 |
| P07737 | 78 |
| P09972 | 78 |
| Q9Y576 | 78 |
| P13611 | 78 |
| Q14181 | 78 |
| O75964 | 78 |
| P21399 | 78 |
| A5YKK6 | 78 |
| P09603 | 78 |
| Q03405 | 78 |
| Q13393 | 78 |
| P03886 | 78 |
| Q06323 | 78 |
| Q9BXS5 | 78 |
| Q9Y6K9 | 78 |
| P19438 | 77 |
| P25054 | 77 |
| P27708 | 77 |
| Q9BVK6 | 77 |
| O00483 | 77 |
| Q13541 | 77 |
| Q9BYM8 | 77 |
| P19823 | 77 |
| P37173 | 77 |
| P00395 | 77 |
| P01019 | 77 |
| P11498 | 77 |
| P10071 | 77 |
| Q16718 | 77 |
| P12081 | 77 |
| Q63HN8 | 77 |
| P17568 | 76 |
| P09382 | 76 |
| O43396 | 76 |
| Q8IXJ6 | 76 |
| P61224 | 76 |
| O95298 | 76 |
| Q9NR56 | 76 |
| P08123 | 76 |
| Q9Y2Z4 | 76 |
| P08237 | 76 |
| P62256 | 76 |
| P51114 | 76 |
| Q9H832 | 76 |
| P55210 | 76 |
| O43920 | 76 |
| P31689 | 76 |
| Q03164 | 76 |
| O43852 | 76 |
| Q9P2N7 | 76 |
| O00268 | 75 |
| P18887 | 75 |
| Q9P2K8 | 75 |
| P31942 | 75 |
| Q9H0W8 | 75 |
| P00367 | 75 |
| P08236 | 75 |
| P01023 | 75 |
| Q9P0L0 | 75 |
| Q9NU22 | 75 |
| P51970 | 75 |
| P78346 | 75 |
| Q13769 | 75 |

|        |    |
|--------|----|
| P48729 | 75 |
| Q9Y277 | 75 |
| Q15424 | 75 |
| Q02790 | 74 |
| P45973 | 74 |
| Q9Y5L4 | 74 |
| P41240 | 74 |
| Q03111 | 74 |
| Q9BQE3 | 74 |
| Q15436 | 74 |
| Q92997 | 74 |
| O94952 | 74 |
| Q9GZZ9 | 74 |
| P32320 | 74 |
| Q92783 | 74 |
| O75909 | 74 |
| O43747 | 74 |
| P23229 | 74 |
| Q9UJU6 | 74 |
| Q15345 | 74 |
| Q7L576 | 74 |
| O14929 | 73 |
| Q92889 | 73 |
| P98082 | 73 |
| Q13185 | 73 |
| P31947 | 73 |
| P67936 | 73 |
| Q07820 | 73 |
| O43318 | 73 |
| P36897 | 73 |
| Q16637 | 73 |
| Q13098 | 73 |
| O00622 | 73 |
| Q99836 | 73 |
| Q8ND04 | 73 |
| P49643 | 73 |
| A8CG34 | 73 |
| Q15293 | 72 |
| O60583 | 72 |
| Q9GZQ8 | 72 |
| Q9NSD9 | 72 |
| P00492 | 72 |
| Q9BUL9 | 72 |
| O43592 | 72 |
| Q96AD5 | 72 |
| Q96PU8 | 72 |
| Q9GZT9 | 72 |
| Q01105 | 72 |
| P46977 | 72 |
| Q14980 | 72 |
| Q86UP2 | 72 |
| Q9HCE1 | 72 |
| O14920 | 72 |
| P08670 | 72 |
| Q99714 | 71 |
| P04196 | 71 |
| Q8TB52 | 71 |
| Q9GZZ1 | 71 |
| Q9UGN5 | 71 |
| Q99547 | 71 |
| O60291 | 71 |
| P19784 | 71 |
| Q9NQW6 | 71 |
| Q08431 | 71 |
| Q03188 | 71 |



|        |    |
|--------|----|
| O75380 | 71 |
| Q96NC0 | 71 |
| P00966 | 71 |
| P0DMV9 | 71 |
| Q86TM6 | 71 |
| Q92541 | 71 |
| O43791 | 71 |
| Q9UJW0 | 71 |
| Q96I99 | 71 |
| O75083 | 71 |
| Q9BSJ2 | 71 |
| P08962 | 71 |
| Q15019 | 71 |
| P62873 | 71 |
| P50552 | 70 |
| P60981 | 70 |
| Q14691 | 70 |
| Q9Y4W6 | 70 |
| Q99961 | 70 |
| P42765 | 70 |
| Q9UP83 | 70 |
| Q9BTE1 | 70 |
| Q15942 | 70 |
| P50579 | 70 |
| O60678 | 70 |
| Q96L91 | 70 |
| P05423 | 70 |
| Q13103 | 69 |
| O95433 | 69 |
| P49591 | 69 |
| O95619 | 69 |
| Q9H5Z1 | 69 |
| P24752 | 69 |
| P02794 | 69 |
| Q08752 | 69 |
| Q9Y285 | 69 |
| Q9UHD2 | 69 |
| P07305 | 69 |
| Q10567 | 69 |
| P35580 | 69 |
| P14406 | 69 |
| Q9Y276 | 69 |
| O15155 | 68 |
| Q13416 | 68 |
| P14854 | 68 |
| O43678 | 68 |
| Q13263 | 68 |
| O60925 | 68 |
| P05155 | 68 |
| P17302 | 68 |
| Q15067 | 68 |
| Q6I9Y2 | 68 |
| O14776 | 68 |
| P23919 | 68 |
| O95208 | 68 |
| Q14C86 | 68 |
| P35749 | 68 |
| O75122 | 68 |
| O75907 | 68 |
| Q7Z333 | 67 |
| Q9Y508 | 67 |
| Q9NX14 | 67 |
| P10398 | 67 |
| P08648 | 67 |
| Q96BH1 | 67 |

|        |    |
|--------|----|
| Q6P3X3 | 67 |
| Q13112 | 67 |
| O14791 | 67 |
| Q15075 | 67 |
| Q92598 | 67 |
| Q03252 | 67 |
| P54819 | 67 |
| P06727 | 67 |
| Q06787 | 67 |
| P07951 | 67 |
| Q07889 | 67 |
| Q86Y39 | 67 |
| Q8N6H7 | 67 |
| Q9Y4L5 | 67 |
| P19525 | 66 |
| P06132 | 66 |
| Q9NR19 | 66 |
| P55199 | 66 |
| P20933 | 66 |
| Q13216 | 66 |
| P52565 | 66 |
| Q9UKV5 | 66 |
| P02461 | 66 |
| P51610 | 66 |
| Q96BK5 | 66 |
| P08697 | 66 |
| Q8WU90 | 66 |
| Q01082 | 66 |
| P02792 | 66 |
| Q96G03 | 66 |
| Q15751 | 66 |
| Q15031 | 66 |
| Q9NPA8 | 66 |
| P14927 | 66 |
| Q7Z2W4 | 65 |
| Q86VV8 | 65 |
| Q14061 | 65 |
| P14868 | 65 |
| Q16270 | 65 |
| Q96R06 | 65 |
| Q15437 | 65 |
| O75665 | 65 |
| Q9Y2W1 | 65 |
| P23381 | 65 |
| P09493 | 65 |
| P08174 | 65 |
| Q96K17 | 65 |
| P00568 | 65 |
| Q16595 | 65 |
| Q92878 | 65 |
| P35754 | 65 |
| Q9ULT8 | 65 |
| P62633 | 65 |
| P28799 | 64 |
| P02749 | 64 |
| Q99986 | 64 |
| P30405 | 64 |
| P61026 | 64 |
| Q8TBF4 | 64 |
| P05771 | 64 |
| Q9H9L3 | 64 |
| O95155 | 64 |
| O95376 | 64 |
| P04083 | 64 |
| Q00341 | 64 |

|        |    |
|--------|----|
| P56556 | 64 |
| P09669 | 64 |
| Q9NS69 | 63 |
| P45974 | 63 |
| Q96EY7 | 63 |
| Q7L7X3 | 63 |
| Q9UNF0 | 63 |
| O94826 | 63 |
| Q9HBH1 | 63 |
| Q96QK1 | 63 |
| P31153 | 63 |
| Q96RF0 | 63 |
| P55084 | 63 |
| Q86UA1 | 63 |
| P13797 | 63 |
| Q8NFZ0 | 63 |
| Q01813 | 63 |
| Q9Y291 | 63 |
| P62942 | 63 |
| P35241 | 63 |
| P16949 | 63 |
| Q00613 | 63 |
| Q9UKS6 | 63 |
| Q9UKL0 | 62 |
| Q9Y5L0 | 62 |
| Q86UX7 | 62 |
| Q9H074 | 62 |
| Q9BVS5 | 62 |
| P61966 | 62 |
| Q08722 | 62 |
| Q15058 | 62 |
| P35226 | 62 |
| Q5GLZ8 | 62 |
| Q9Y6D9 | 62 |
| O14974 | 62 |
| O00743 | 62 |
| P49848 | 62 |
| O14727 | 62 |
| P52655 | 62 |
| Q8WZ42 | 62 |
| Q8WUI4 | 61 |
| P82673 | 61 |
| P28300 | 61 |
| Q01469 | 61 |
| Q15653 | 61 |
| Q93008 | 61 |
| P36957 | 61 |
| Q9C037 | 61 |
| Q96IY1 | 61 |
| Q8NBJ4 | 61 |
| Q14671 | 61 |
| P16389 | 61 |
| Q9H081 | 61 |
| P28838 | 60 |
| O75530 | 60 |
| P17858 | 60 |
| P08397 | 60 |
| Q9NRW1 | 60 |
| P48723 | 60 |
| P13667 | 60 |
| P27105 | 60 |
| P61225 | 60 |
| P21810 | 60 |
| Q69YH5 | 60 |
| P03897 | 60 |

|        |    |
|--------|----|
| O76003 | 60 |
| P60891 | 60 |
| Q96SB4 | 60 |
| Q9Y2Z0 | 60 |
| Q96D71 | 60 |
| P06280 | 59 |
| O00746 | 59 |
| Q96MW5 | 59 |
| O15116 | 59 |
| Q96QE3 | 59 |
| Q9Y388 | 59 |
| P08572 | 59 |
| Q86WJ1 | 59 |
| Q5SW96 | 59 |
| O96028 | 59 |
| P16298 | 59 |
| O95071 | 59 |
| Q86VP6 | 59 |
| Q15020 | 58 |
| Q15047 | 58 |
| P51692 | 58 |
| P17301 | 58 |
| Q8WVY7 | 58 |
| Q8N668 | 58 |
| O15164 | 58 |
| Q06210 | 58 |
| Q16774 | 58 |
| Q9NYJ8 | 58 |
| O95218 | 58 |
| Q9NQP4 | 58 |
| P30085 | 58 |
| Q9H9G7 | 58 |
| P17813 | 58 |
| O15066 | 58 |
| Q9NYV4 | 58 |
| Q7L2E3 | 58 |
| Q9H7Z6 | 58 |
| P07203 | 58 |
| Q92552 | 58 |
| Q9Y3C1 | 58 |
| Q9Y3A5 | 57 |
| Q13503 | 57 |
| Q8TEQ6 | 57 |
| Q8TCJ2 | 57 |
| P62879 | 57 |
| Q9UBQ7 | 57 |
| P13726 | 57 |
| Q16851 | 57 |
| O00159 | 57 |
| Q9NNW7 | 57 |
| Q7Z434 | 57 |
| Q96EH3 | 57 |
| P50454 | 57 |
| Q3ZCQ8 | 57 |
| Q15654 | 56 |
| Q00688 | 56 |
| Q9ULZ3 | 56 |
| P15586 | 56 |
| P07148 | 56 |
| Q17RS7 | 56 |
| P35613 | 56 |
| Q8WXA9 | 56 |
| Q96JC1 | 56 |
| P22413 | 56 |
| P11532 | 56 |

|        |    |
|--------|----|
| Q9ULG1 | 56 |
| O95793 | 56 |
| Q9NR31 | 56 |
| Q68CZ1 | 56 |
| P35520 | 56 |
| Q02818 | 56 |
| P68036 | 56 |
| Q14353 | 56 |
| Q07866 | 56 |
| Q92879 | 56 |
| O00411 | 56 |
| P02656 | 55 |
| P12074 | 55 |
| Q96QD9 | 55 |
| Q9BSH4 | 55 |
| Q99439 | 55 |
| Q9UBE0 | 55 |
| Q53EL6 | 55 |
| O75116 | 55 |
| P30520 | 55 |
| P18669 | 55 |
| P31431 | 55 |
| Q8TEW0 | 55 |
| Q13162 | 55 |
| P13612 | 55 |
| Q15418 | 55 |
| Q96EL3 | 54 |
| Q9BQ95 | 54 |
| P38606 | 54 |
| P42025 | 54 |
| Q9NQ29 | 54 |
| Q96ST2 | 54 |
| P12111 | 54 |
| O60884 | 54 |
| Q01581 | 54 |
| Q13523 | 54 |
| O15355 | 54 |
| P07858 | 54 |
| P14324 | 54 |
| Q86YP4 | 54 |
| Q5JTJ3 | 54 |
| P17174 | 54 |
| Q9Y237 | 54 |
| Q16254 | 54 |
| O95630 | 54 |
| Q9NQR4 | 54 |
| P26885 | 54 |
| Q9Y5J7 | 54 |
| P51608 | 54 |
| Q96T76 | 54 |
| O95167 | 54 |
| P51659 | 54 |
| O94927 | 54 |
| Q99757 | 53 |
| P06737 | 53 |
| Q9UPY8 | 53 |
| O43776 | 53 |
| Q9NSK0 | 53 |
| Q9BRD0 | 53 |
| P26583 | 53 |
| O43913 | 53 |
| Q96DV4 | 53 |
| Q14847 | 53 |
| Q8IXI2 | 53 |
| P36776 | 53 |

|        |    |
|--------|----|
| P20908 | 53 |
| O60220 | 53 |
| Q9Y312 | 53 |
| Q16658 | 53 |
| P04439 | 53 |
| P29375 | 53 |
| Q2M2I8 | 53 |
| Q9NRP0 | 53 |
| Q8NHV4 | 53 |
| P11169 | 52 |
| P48506 | 52 |
| Q02539 | 52 |
| P10301 | 52 |
| Q66GS9 | 52 |
| Q9NVX0 | 52 |
| Q6STE5 | 52 |
| P61019 | 52 |
| P02760 | 52 |
| Q86VX2 | 52 |
| O14893 | 52 |
| Q96P11 | 52 |
| Q9Y584 | 52 |
| Q6P161 | 52 |
| Q15907 | 52 |
| O15530 | 52 |
| Q9BZL1 | 52 |
| P48681 | 52 |
| Q6P1L8 | 52 |
| Q14573 | 52 |
| O95163 | 52 |
| O00468 | 52 |
| Q8IVT5 | 52 |
| Q0JRZ9 | 52 |
| Q8IV48 | 52 |
| Q01995 | 52 |
| P29466 | 52 |
| P61916 | 52 |
| Q9H8M9 | 51 |
| P16234 | 51 |
| O43252 | 51 |
| P30044 | 51 |
| Q9H0A8 | 51 |
| Q9NWU1 | 51 |
| P50148 | 51 |
| Q13158 | 51 |
| Q99638 | 51 |
| Q7L0Y3 | 51 |
| O43805 | 51 |
| Q14315 | 51 |
| Q06330 | 51 |
| Q05682 | 51 |
| P37802 | 51 |
| P18031 | 51 |
| Q93074 | 51 |
| P98179 | 51 |
| Q99633 | 51 |
| Q7Z4H7 | 51 |
| Q9BYN0 | 51 |
| P52747 | 51 |
| P51572 | 51 |
| P33121 | 51 |
| O95394 | 51 |
| Q9UBQ0 | 51 |
| Q96IY4 | 50 |
| O95168 | 50 |

|        |    |
|--------|----|
| Q5VYK3 | 50 |
| O14530 | 50 |
| P51884 | 50 |
| Q9Y6G5 | 50 |
| Q96CS2 | 50 |
| Q07812 | 50 |
| Q12962 | 50 |
| Q9H845 | 50 |
| Q8IXI1 | 50 |
| Q9UPT5 | 50 |
| Q9NQC3 | 50 |
| P07357 | 50 |
| P00414 | 50 |
| P55265 | 50 |
| P21926 | 50 |
| Q96AJ9 | 50 |
| P14923 | 50 |
| Q9Y6H1 | 50 |
| P40818 | 50 |
| Q16181 | 50 |
| O75586 | 50 |
| P60520 | 49 |
| Q9NPF4 | 49 |
| Q13155 | 49 |
| P35080 | 49 |
| P10124 | 49 |
| Q07954 | 49 |
| P55789 | 49 |
| P34810 | 49 |
| O95251 | 49 |
| Q4LE39 | 49 |
| P13861 | 49 |
| Q9HC52 | 49 |
| Q96GW9 | 49 |
| O75688 | 49 |
| Q9NUU7 | 49 |
| O94925 | 49 |
| P08519 | 49 |
| O15027 | 49 |
| Q9UBV2 | 49 |
| P49902 | 49 |
| Q14739 | 49 |
| Q9H0U6 | 49 |
| Q9BWD1 | 49 |
| Q9HB71 | 49 |
| O95817 | 49 |
| P07358 | 49 |
| P51687 | 49 |
| Q8N5P1 | 49 |
| Q16134 | 49 |
| Q5ST30 | 49 |
| Q9NP72 | 49 |
| O95633 | 48 |
| Q9Y3C7 | 48 |
| Q8IXK0 | 48 |
| Q9NYU2 | 48 |
| Q9Y375 | 48 |
| Q5T200 | 48 |
| P27707 | 48 |
| O95831 | 48 |
| Q9BUF5 | 48 |
| Q9BUR4 | 48 |
| Q9NVD7 | 48 |
| P52294 | 48 |
| Q9Y512 | 48 |

|        |    |
|--------|----|
| Q9Y383 | 48 |
| P39060 | 48 |
| P00387 | 48 |
| P00491 | 48 |
| Q9NRW7 | 48 |
| Q9UMX1 | 48 |
| Q10713 | 48 |
| Q6UXV4 | 48 |
| Q14186 | 48 |
| P10768 | 48 |
| Q96GM5 | 48 |
| O95983 | 48 |
| O75369 | 48 |
| O95628 | 48 |
| O95149 | 48 |
| Q9NQ88 | 47 |
| Q08426 | 47 |
| Q9BTT4 | 47 |
| O43752 | 47 |
| Q9NZ43 | 47 |
| P15848 | 47 |
| Q14624 | 47 |
| Q7Z7H8 | 47 |
| Q8TAD8 | 47 |
| P42226 | 47 |
| Q86TB9 | 47 |
| Q96QU8 | 47 |
| Q68E01 | 47 |
| Q13509 | 47 |
| Q9BTA9 | 47 |
| Q9H0E3 | 47 |
| Q9UN86 | 47 |
| Q9P032 | 47 |
| Q9H2P9 | 47 |
| Q9H492 | 47 |
| P08195 | 47 |
| O75475 | 47 |
| Q9NTJ5 | 47 |
| P09211 | 47 |
| Q96P16 | 47 |
| O15143 | 47 |
| Q9Y3F4 | 47 |
| P51151 | 47 |
| Q9UHW5 | 47 |
| Q9UBP0 | 47 |
| Q9NP81 | 47 |
| Q14004 | 46 |
| Q9H6D7 | 46 |
| Q9HA77 | 46 |
| P07686 | 46 |
| Q9BS26 | 46 |
| O43306 | 46 |
| P57678 | 46 |
| Q8TAE8 | 46 |
| Q8WX92 | 46 |
| Q15628 | 46 |
| P39880 | 46 |
| Q99871 | 46 |
| Q7Z7C8 | 46 |
| P05997 | 46 |
| O75521 | 46 |
| Q9BRF8 | 46 |
| Q9BQE4 | 46 |
| Q96EE3 | 46 |
| Q8NI22 | 46 |



|        |    |
|--------|----|
| Q04446 | 46 |
| P27448 | 46 |
| Q8TEB1 | 46 |
| Q9H0K6 | 46 |
| Q9H2U1 | 46 |
| P60660 | 46 |
| P30519 | 46 |
| Q96DZ1 | 45 |
| P53778 | 45 |
| P00740 | 45 |
| Q13232 | 45 |
| Q9NPJ6 | 45 |
| O00505 | 45 |
| Q8WYQ5 | 45 |
| Q16514 | 45 |
| Q16643 | 45 |
| P35573 | 45 |
| Q8TAF3 | 45 |
| P15559 | 45 |
| Q92888 | 45 |
| Q96EZ8 | 45 |
| O60313 | 45 |
| Q10471 | 45 |
| Q96IX5 | 45 |
| Q8N5N7 | 45 |
| Q9UBI1 | 45 |
| P62328 | 45 |
| P40939 | 45 |
| P36268 | 45 |
| Q14192 | 45 |
| Q5BJF6 | 45 |
| Q86X83 | 45 |
| O75534 | 45 |
| O75928 | 45 |
| P11233 | 44 |
| P14174 | 44 |
| Q9H4B7 | 44 |
| Q13724 | 44 |
| O95396 | 44 |
| O94808 | 44 |
| Q53T94 | 44 |
| O43815 | 44 |
| O00469 | 44 |
| Q8IY67 | 44 |
| Q8IYA6 | 44 |
| P43304 | 44 |
| O60701 | 44 |
| Q9BU61 | 44 |
| P07359 | 44 |
| P23511 | 44 |
| P35442 | 44 |
| P50402 | 44 |
| Q96BP2 | 44 |
| Q96G61 | 44 |
| P19623 | 44 |
| P05114 | 44 |
| P55196 | 44 |
| Q9UMS0 | 44 |
| P16112 | 44 |
| Q9P0U3 | 44 |
| P45985 | 44 |
| Q9UBS4 | 44 |
| Q8IX18 | 43 |
| Q9BT25 | 43 |
| P05091 | 43 |

|        |    |
|--------|----|
| O75208 | 43 |
| Q9UKV3 | 43 |
| P54098 | 43 |
| P34059 | 43 |
| P53384 | 43 |
| Q6IBW4 | 43 |
| O76031 | 43 |
| Q8TCC3 | 43 |
| Q13439 | 43 |
| Q8NBX0 | 43 |
| Q9UDY4 | 43 |
| O60684 | 43 |
| Q09666 | 43 |
| Q9BUR5 | 43 |
| P07225 | 43 |
| P0C0L5 | 43 |
| Q9NV88 | 43 |
| Q96FW1 | 43 |
| Q9Y310 | 42 |
| P11586 | 42 |
| P02788 | 42 |
| Q9H8Y8 | 42 |
| O60921 | 42 |
| Q00537 | 42 |
| Q86YT6 | 42 |
| P60033 | 42 |
| Q8TB37 | 42 |
| Q9Y6J9 | 42 |
| P26022 | 42 |
| P68871 | 42 |
| P06454 | 42 |
| Q8TD16 | 42 |
| P29317 | 42 |
| Q86VI3 | 42 |
| Q92974 | 42 |
| O75436 | 42 |
| Q9Y697 | 42 |
| Q92558 | 42 |
| O60318 | 42 |
| Q9BTC8 | 42 |
| P08473 | 42 |
| Q8WX93 | 42 |
| Q14677 | 42 |
| Q03426 | 42 |
| Q13451 | 42 |
| Q14318 | 42 |
| O96013 | 42 |
| Q9UG63 | 41 |
| O95219 | 41 |
| Q9NX63 | 41 |
| Q53GQ0 | 41 |
| Q9UKG1 | 41 |
| P46821 | 41 |
| Q9NVU0 | 41 |
| Q9Y5P6 | 41 |
| Q99715 | 41 |
| Q92572 | 41 |
| Q9UJY5 | 41 |
| Q96SL4 | 41 |
| P21980 | 41 |
| Q9ULK4 | 41 |
| Q12882 | 41 |
| Q13126 | 41 |
| P11908 | 41 |
| P33527 | 41 |

|        |    |
|--------|----|
| P13716 | 41 |
| Q9UPN6 | 41 |
| Q06033 | 41 |
| P52926 | 41 |
| O43819 | 41 |
| Q9H0P0 | 41 |
| O95707 | 41 |
| Q5JVF3 | 41 |
| Q02809 | 40 |
| Q02978 | 40 |
| Q9NZN8 | 40 |
| Q32P41 | 40 |
| Q96CU9 | 40 |
| Q00536 | 40 |
| P11766 | 40 |
| Q12907 | 40 |
| Q9ULM3 | 40 |
| Q9NRL2 | 40 |
| P31151 | 40 |
| P12107 | 40 |
| Q5F1R6 | 40 |
| Q9NPI1 | 40 |
| Q9NNW5 | 40 |
| Q9Y263 | 40 |
| Q9UH99 | 40 |
| P01889 | 40 |
| Q12913 | 40 |
| P24043 | 40 |
| P55145 | 40 |
| P49748 | 40 |
| Q8TDY2 | 39 |
| Q9NZZ3 | 39 |
| P09960 | 39 |
| O75027 | 39 |
| P27658 | 39 |
| Q9NVM9 | 39 |
| P49770 | 39 |
| O00470 | 39 |
| Q9ULR0 | 39 |
| Q8NF37 | 39 |
| Q96E29 | 39 |
| P17655 | 39 |
| P15144 | 39 |
| Q8IWE4 | 39 |
| Q8NCF5 | 39 |
| Q9NZL9 | 39 |
| P16401 | 39 |
| O95573 | 39 |
| Q9UQ13 | 39 |
| O15541 | 39 |
| Q9NVI7 | 39 |
| Q9BQ15 | 39 |
| Q9Y3D8 | 39 |
| Q9UHD8 | 39 |
| O14787 | 39 |
| P49918 | 39 |
| Q6IA86 | 39 |
| P0DP91 | 39 |
| Q2TAA5 | 39 |
| Q9H270 | 39 |
| Q9NYV6 | 38 |
| P49840 | 38 |
| O00330 | 38 |
| Q05209 | 38 |
| P04080 | 38 |

|        |    |
|--------|----|
| Q6P9B9 | 38 |
| Q86SZ2 | 38 |
| Q9NPH2 | 38 |
| Q16512 | 38 |
| Q7Z4R8 | 38 |
| Q99536 | 38 |
| O95425 | 38 |
| O75175 | 38 |
| Q96P70 | 38 |
| Q8TF01 | 38 |
| Q9BTU6 | 38 |
| Q9Y4X5 | 38 |
| Q99733 | 38 |
| P50995 | 38 |
| Q9BRX5 | 38 |
| Q9BRX9 | 38 |
| Q9Y315 | 38 |
| Q9NQW7 | 38 |
| P78347 | 38 |
| Q9H4H8 | 38 |
| Q6IN84 | 38 |
| O00623 | 38 |
| Q93052 | 38 |
| Q16850 | 37 |
| P27169 | 37 |
| P30414 | 37 |
| Q92734 | 37 |
| P98066 | 37 |
| P17535 | 37 |
| Q9UPT9 | 37 |
| Q13596 | 37 |
| P24666 | 37 |
| O95429 | 37 |
| Q96G25 | 37 |
| O95166 | 37 |
| Q16555 | 37 |
| Q6P582 | 37 |
| Q96EL2 | 37 |
| Q86YS6 | 37 |
| Q9Y5U2 | 37 |
| Q9H981 | 37 |
| Q9UBK9 | 37 |
| P16403 | 37 |
| Q9NVH2 | 37 |
| Q9UBF8 | 37 |
| O95999 | 37 |
| O75362 | 37 |
| Q9P0M6 | 37 |
| Q92633 | 37 |
| P00742 | 37 |
| P10321 | 37 |
| A7E2V4 | 37 |
| Q9ULV4 | 37 |
| Q14693 | 37 |
| Q14232 | 37 |
| P39687 | 37 |
| Q9HD34 | 37 |
| Q13454 | 37 |
| Q9NQT8 | 37 |
| Q12792 | 37 |
| O60331 | 37 |
| O43617 | 37 |
| Q6NUS6 | 37 |
| P16219 | 36 |
| Q8TCD5 | 36 |

|        |    |
|--------|----|
| P69905 | 36 |
| P36543 | 36 |
| Q9NVV4 | 36 |
| P13671 | 36 |
| P03952 | 36 |
| Q96KG9 | 36 |
| Q9UMR2 | 36 |
| Q9Y6N1 | 36 |
| Q9H082 | 36 |
| Q8NE71 | 36 |
| Q96AY3 | 36 |
| Q9BY43 | 36 |
| P46734 | 36 |
| O14617 | 36 |
| Q9BTW9 | 36 |
| Q99942 | 36 |
| P30038 | 36 |
| Q96QC0 | 36 |
| O60927 | 36 |
| P41212 | 36 |
| O15460 | 36 |
| Q9BWF3 | 36 |
| Q99615 | 36 |
| P00751 | 36 |
| Q8N766 | 36 |
| Q9Y2K7 | 36 |
| Q14118 | 36 |
| P14649 | 36 |
| Q96SB3 | 36 |
| Q9H7L9 | 36 |
| P52799 | 35 |
| Q96I15 | 35 |
| Q9BV79 | 35 |
| P42166 | 35 |
| P21281 | 35 |
| Q9UID3 | 35 |
| P09936 | 35 |
| O75197 | 35 |
| Q12972 | 35 |
| P51649 | 35 |
| Q9Y3D7 | 35 |
| Q6RW13 | 35 |
| Q00577 | 35 |
| O75356 | 35 |
| Q13557 | 35 |
| Q14444 | 35 |
| P22061 | 35 |
| P08603 | 35 |
| Q9Y624 | 35 |
| P11182 | 35 |
| Q9UNF1 | 35 |
| Q9NWZ8 | 35 |
| O60671 | 35 |
| Q8N138 | 35 |
| Q9Y2X7 | 35 |
| Q8NBM4 | 35 |
| P09871 | 35 |
| P49716 | 35 |
| Q08257 | 35 |
| Q14344 | 35 |
| Q14596 | 35 |
| Q15042 | 35 |
| Q96CB8 | 35 |
| Q9UNZ2 | 35 |
| Q86U28 | 35 |

|        |    |
|--------|----|
| P00750 | 34 |
| Q96Q11 | 34 |
| Q14151 | 34 |
| Q8IXZ2 | 34 |
| Q86WA8 | 34 |
| Q9HCD5 | 34 |
| Q8TCG1 | 34 |
| Q9UBS0 | 34 |
| P78536 | 34 |
| Q9BRP4 | 34 |
| Q9UJ68 | 34 |
| Q96KP4 | 34 |
| O15254 | 34 |
| Q8WXH0 | 34 |
| Q9UIV1 | 34 |
| P40855 | 34 |
| Q8NBF2 | 34 |
| Q5VTL8 | 34 |
| Q15738 | 34 |
| Q13428 | 34 |
| P49903 | 34 |
| O95985 | 34 |
| Q9UHP3 | 34 |
| P26232 | 34 |
| Q15833 | 34 |
| P19105 | 33 |
| P27701 | 33 |
| Q14534 | 33 |
| Q8IZD4 | 33 |
| Q12929 | 33 |
| Q96G01 | 33 |
| Q9NYB0 | 33 |
| Q07960 | 33 |
| Q8N163 | 33 |
| Q9HC35 | 33 |
| Q9Y487 | 33 |
| Q96JK2 | 33 |
| Q9HCC0 | 33 |
| P54259 | 33 |
| Q8IYI6 | 33 |
| P14550 | 33 |
| P13747 | 33 |
| Q9NYU1 | 33 |
| Q9H269 | 33 |
| Q96S55 | 33 |
| Q6ZTU2 | 33 |
| Q8WWM7 | 33 |
| Q9Y6I9 | 33 |
| O94966 | 33 |
| Q15813 | 33 |
| P51570 | 33 |
| P78356 | 33 |
| Q02252 | 33 |
| P43490 | 32 |
| Q99614 | 32 |
| Q32P28 | 32 |
| Q9H9F9 | 32 |
| Q9UPT8 | 32 |
| Q9Y5Y2 | 32 |
| Q06190 | 32 |
| Q9UBW5 | 32 |
| Q03393 | 32 |
| Q9UK58 | 32 |
| Q96G46 | 32 |
| Q8IWS0 | 32 |

|        |    |
|--------|----|
| O95456 | 32 |
| Q96MU7 | 32 |
| Q9Y2T2 | 32 |
| Q0IIM8 | 32 |
| Q6P2E9 | 32 |
| Q96RQ1 | 32 |
| O60502 | 32 |
| O75449 | 32 |
| P78417 | 32 |
| Q9HC98 | 32 |
| P61587 | 32 |
| Q9UK53 | 32 |
| O60293 | 32 |
| Q9UG56 | 32 |
| Q96B36 | 32 |
| Q676U5 | 32 |
| Q9NRA8 | 32 |
| Q4KMQ2 | 32 |
| P16615 | 32 |
| O94842 | 32 |
| Q6UB35 | 32 |
| Q9H4M9 | 32 |
| Q9UM00 | 32 |
| P00736 | 32 |
| Q06547 | 31 |
| Q5UIP0 | 31 |
| P02795 | 31 |
| O14745 | 31 |
| Q9UHB7 | 31 |
| P08319 | 31 |
| Q9H3S7 | 31 |
| Q8NCE0 | 31 |
| Q5HYK7 | 31 |
| Q9BUK0 | 31 |
| Q96I24 | 31 |
| Q14257 | 31 |
| O60427 | 31 |
| Q969U7 | 31 |
| Q71SY5 | 31 |
| Q9UJZ1 | 31 |
| Q969H6 | 31 |
| Q9H2M9 | 31 |
| P27487 | 31 |
| P35030 | 31 |
| P26374 | 31 |
| Q8N8S7 | 31 |
| P30837 | 31 |
| O95544 | 31 |
| Q5JRX3 | 31 |
| O00400 | 31 |
| Q6P4F2 | 31 |
| Q92934 | 31 |
| P32322 | 31 |
| Q92925 | 31 |
| Q969X1 | 31 |
| Q4G0J3 | 31 |
| O75143 | 31 |
| P57764 | 31 |
| Q8IXH7 | 31 |
| Q7Z6M4 | 31 |
| P02655 | 31 |
| Q7Z4N8 | 31 |
| Q9BRL6 | 31 |
| Q15528 | 31 |
| Q6AI08 | 30 |

|        |    |
|--------|----|
| P16989 | 30 |
| Q9Y478 | 30 |
| P51911 | 30 |
| Q9NVJ2 | 30 |
| Q16706 | 30 |
| Q15800 | 30 |
| P40616 | 30 |
| Q02153 | 30 |
| P55212 | 30 |
| Q9NX57 | 30 |
| Q8N5K1 | 30 |
| Q99541 | 30 |
| Q14185 | 30 |
| Q0PNE2 | 30 |
| Q9BZE9 | 30 |
| P10412 | 30 |
| Q6UVK1 | 30 |
| P07711 | 30 |
| Q06546 | 30 |
| Q9Y282 | 30 |
| Q9Y218 | 30 |
| Q9NR50 | 30 |
| Q8WXI9 | 30 |
| Q86Y37 | 30 |
| Q9NV56 | 30 |
| Q16611 | 30 |
| Q99519 | 30 |
| Q9NRL3 | 30 |
| P01011 | 30 |
| Q9HBI1 | 30 |
| P53355 | 30 |
| Q14157 | 30 |
| Q9UMY1 | 30 |
| Q86VM9 | 30 |
| O76071 | 30 |
| P30533 | 30 |
| Q6P1K8 | 30 |
| O15446 | 30 |
| Q8N3Z6 | 30 |
| Q16890 | 30 |
| P49366 | 29 |
| Q7Z417 | 29 |
| Q9NPJ3 | 29 |
| Q13563 | 29 |
| Q9H0E9 | 29 |
| P10109 | 29 |
| Q9BTD8 | 29 |
| Q9NZN4 | 29 |
| Q9H4B0 | 29 |
| O14786 | 29 |
| Q15643 | 29 |
| Q9NYB9 | 29 |
| Q7L2J0 | 29 |
| P14317 | 29 |
| Q13356 | 29 |
| P61599 | 29 |
| O75962 | 29 |
| O60488 | 29 |
| Q12789 | 29 |
| Q9UPP1 | 29 |
| P27816 | 29 |
| P63172 | 29 |
| Q13637 | 29 |
| P05109 | 29 |
| O95881 | 29 |



|        |    |
|--------|----|
| Q96GM8 | 29 |
| Q16739 | 29 |
| Q14571 | 29 |
| Q13907 | 29 |
| P07738 | 29 |
| P36639 | 29 |
| P48449 | 29 |
| Q96S94 | 29 |
| Q96EP1 | 29 |
| P50897 | 29 |
| Q13630 | 29 |
| Q9UKK9 | 29 |
| Q9UDY2 | 29 |
| Q99717 | 29 |
| P33897 | 28 |
| O60664 | 28 |
| P16402 | 28 |
| Q9BRG1 | 28 |
| Q8WTV0 | 28 |
| Q9H944 | 28 |
| P25311 | 28 |
| P00352 | 28 |
| P42126 | 28 |
| O75817 | 28 |
| Q9Y4P3 | 28 |
| Q9UHD1 | 28 |
| P55786 | 28 |
| Q16831 | 28 |
| Q14697 | 28 |
| Q9BPX5 | 28 |
| P08133 | 28 |
| P49189 | 28 |
| Q96K21 | 28 |
| P18583 | 28 |
| O14983 | 28 |
| Q9UI12 | 28 |
| Q86SQ9 | 28 |
| Q9UPN3 | 28 |
| P48147 | 28 |
| Q9UNY4 | 28 |
| Q01658 | 28 |
| P20337 | 28 |
| Q07092 | 28 |
| Q9Y5A9 | 28 |
| Q92796 | 28 |
| Q9Y696 | 28 |
| Q04724 | 28 |
| P62699 | 28 |
| Q9H8T0 | 28 |
| O43294 | 28 |
| Q13627 | 28 |
| Q7KZI7 | 28 |
| Q9BUP3 | 28 |
| Q9H3N1 | 28 |
| Q8NDF8 | 28 |
| Q9GZR1 | 28 |
| Q8N0X7 | 28 |
| Q15582 | 28 |
| P16435 | 28 |
| Q15758 | 28 |
| P41236 | 28 |
| Q13395 | 27 |
| P20749 | 27 |
| O75351 | 27 |
| Q9Y5J6 | 27 |

|        |    |
|--------|----|
| Q14126 | 27 |
| O00194 | 27 |
| O00418 | 27 |
| P35611 | 27 |
| Q9HCL2 | 27 |
| Q10472 | 27 |
| Q13093 | 27 |
| Q96PU4 | 27 |
| P13798 | 27 |
| Q9NZ08 | 27 |
| Q9BVK2 | 27 |
| Q9H6E5 | 27 |
| Q9NYL9 | 27 |
| P15407 | 27 |
| P15529 | 27 |
| P43155 | 27 |
| Q96CN9 | 27 |
| Q9BXW6 | 27 |
| O94992 | 27 |
| P23142 | 27 |
| Q9Y5T5 | 27 |
| P52306 | 27 |
| O95819 | 27 |
| Q9BW61 | 27 |
| P21291 | 27 |
| P36894 | 27 |
| O94829 | 27 |
| Q9Y6E0 | 27 |
| P15924 | 27 |
| Q27J81 | 27 |
| Q9HD42 | 27 |
| Q6PI98 | 27 |
| Q7L1Q6 | 27 |
| Q8NG11 | 27 |
| O15533 | 27 |
| Q9H553 | 27 |
| Q8IZL2 | 27 |
| P78560 | 27 |
| O95319 | 27 |
| Q8N543 | 27 |
| Q9HBL8 | 27 |
| Q9BTT0 | 27 |
| Q04726 | 27 |
| Q96AP0 | 27 |
| Q9Y547 | 26 |
| Q9NZ01 | 26 |
| P31146 | 26 |
| Q15113 | 26 |
| P21815 | 26 |
| P04632 | 26 |
| Q8NBJ5 | 26 |
| P56937 | 26 |
| P36955 | 26 |
| Q9UBM1 | 26 |
| Q13371 | 26 |
| Q08380 | 26 |
| Q9H2F5 | 26 |
| Q9Y5Q9 | 26 |
| P50135 | 26 |
| Q96DH6 | 26 |
| Q8NFF5 | 26 |
| Q9P086 | 26 |
| Q96P53 | 26 |
| O60524 | 26 |
| P14770 | 26 |

|        |    |
|--------|----|
| Q9NX70 | 26 |
| Q96T60 | 26 |
| P35813 | 26 |
| Q8IWA5 | 26 |
| Q9H6Z4 | 26 |
| Q8TBX8 | 26 |
| Q9NZM1 | 26 |
| Q12802 | 26 |
| Q16222 | 26 |
| Q8NHP6 | 26 |
| Q9NWH9 | 26 |
| Q32MZ4 | 26 |
| Q9BUL8 | 26 |
| Q8TB61 | 26 |
| Q9NPG3 | 26 |
| Q8WUD1 | 26 |
| Q9NRZ7 | 26 |
| Q6YN16 | 26 |
| Q9UHG3 | 26 |
| Q9NWZ3 | 26 |
| Q9Y5R4 | 26 |
| Q15599 | 26 |
| Q15011 | 26 |
| P51178 | 26 |
| Q3ZCM7 | 26 |
| Q9UBV7 | 25 |
| Q9GZN1 | 25 |
| Q96EK6 | 25 |
| Q92947 | 25 |
| P36406 | 25 |
| P54821 | 25 |
| P36405 | 25 |
| Q15650 | 25 |
| Q96HE9 | 25 |
| Q9BPZ7 | 25 |
| Q92908 | 25 |
| O43823 | 25 |
| P11234 | 25 |
| Q8NBZ7 | 25 |
| Q86VZ6 | 25 |
| Q8NFG4 | 25 |
| Q6PJG2 | 25 |
| O43924 | 25 |
| Q9Y5N5 | 25 |
| P52888 | 25 |
| Q96T23 | 25 |
| Q5T9A4 | 25 |
| Q9UJY4 | 25 |
| Q96DT6 | 25 |
| O00165 | 25 |
| O75381 | 25 |
| P32321 | 25 |
| Q9BYE7 | 25 |
| Q9NYP7 | 25 |
| Q9HB90 | 25 |
| O60238 | 25 |
| Q9UDR5 | 25 |
| Q9H0F6 | 25 |
| O15318 | 25 |
| Q02952 | 25 |
| Q3KQV9 | 25 |
| Q9P0U4 | 25 |
| Q8N9A8 | 25 |
| P17693 | 25 |
| Q562R1 | 25 |

|        |    |
|--------|----|
| P55058 | 25 |
| Q9C0B1 | 25 |
| P49908 | 25 |
| O15091 | 25 |
| P54687 | 25 |
| P02654 | 25 |
| O00213 | 25 |
| O75131 | 25 |
| Q14112 | 24 |
| Q15853 | 24 |
| Q9Y3E0 | 24 |
| Q96SW2 | 24 |
| Q969V3 | 24 |
| Q01433 | 24 |
| O43504 | 24 |
| O75529 | 24 |
| Q92539 | 24 |
| Q5MNZ9 | 24 |
| Q16204 | 24 |
| Q8N5C6 | 24 |
| Q9Y4P8 | 24 |
| Q6IBS0 | 24 |
| Q9BTV4 | 24 |
| O95810 | 24 |
| Q9UBJ2 | 24 |
| Q9BZ95 | 24 |
| Q9H773 | 24 |
| O60613 | 24 |
| Q53S33 | 24 |
| Q9ULJ6 | 24 |
| Q9NY33 | 24 |
| Q86YH6 | 24 |
| P32455 | 24 |
| Q8NE86 | 24 |
| O95837 | 24 |
| O43670 | 24 |
| P13196 | 24 |
| Q9P0J1 | 24 |
| Q86VP1 | 24 |
| Q9NZN5 | 24 |
| Q8IV08 | 24 |
| Q6NYC1 | 24 |
| P20783 | 24 |
| Q15771 | 24 |
| Q8NDT2 | 24 |
| P49116 | 24 |
| P09455 | 23 |
| P54803 | 23 |
| Q9H967 | 23 |
| Q9H2J4 | 23 |
| P12429 | 23 |
| Q9BX59 | 23 |
| Q969M3 | 23 |
| Q6A112 | 23 |
| Q68EM7 | 23 |
| Q6PCE3 | 23 |
| P17275 | 23 |
| O43772 | 23 |
| P53701 | 23 |
| Q99608 | 23 |
| Q8WUB8 | 23 |
| Q5TCZ1 | 23 |
| Q96F25 | 23 |
| Q15417 | 23 |
| Q9Y3A6 | 23 |

|        |    |
|--------|----|
| Q8N884 | 23 |
| Q9NVH1 | 23 |
| O00625 | 23 |
| Q96HE7 | 23 |
| Q9NWB6 | 23 |
| P13224 | 23 |
| Q9BRP8 | 23 |
| Q86YR5 | 23 |
| Q7Z569 | 23 |
| Q15532 | 23 |
| P46926 | 23 |
| O95302 | 23 |
| Q9H7E2 | 23 |
| Q13459 | 23 |
| P35237 | 23 |
| O15427 | 23 |
| O00461 | 23 |
| O00178 | 22 |
| P29372 | 22 |
| Q56P03 | 22 |
| Q9Y6W3 | 22 |
| L0R819 | 22 |
| Q8N3R9 | 22 |
| P30040 | 22 |
| Q9Y3C4 | 22 |
| Q96IV0 | 22 |
| Q9NWT6 | 22 |
| Q9Y3A3 | 22 |
| P48739 | 22 |
| P86791 | 22 |
| Q9UL01 | 22 |
| Q9H9Q4 | 22 |
| Q9UNH7 | 22 |
| Q03013 | 22 |
| Q15404 | 22 |
| P07199 | 22 |
| Q9Y5P4 | 22 |
| O14647 | 22 |
| Q16775 | 22 |
| P48509 | 22 |
| Q9NX55 | 22 |
| Q6QNY0 | 22 |
| Q14CW9 | 22 |
| O95905 | 22 |
| P78381 | 22 |
| P35556 | 22 |
| Q8WU20 | 22 |
| P51452 | 21 |
| Q96RI0 | 21 |
| Q9H1H9 | 21 |
| Q9C0D9 | 21 |
| Q6FIF0 | 21 |
| Q96JI7 | 21 |
| O60271 | 21 |
| Q9NWB7 | 21 |
| Q12770 | 21 |
| P22033 | 21 |
| Q2TBE0 | 21 |
| Q9UKZ1 | 21 |
| P55347 | 21 |
| Q9BZV1 | 21 |
| Q92819 | 21 |
| Q03001 | 21 |
| O60232 | 21 |
| O15344 | 21 |

|        |    |
|--------|----|
| P02746 | 21 |
| Q6VY07 | 21 |
| Q8WYH8 | 21 |
| Q8IZ73 | 21 |
| Q9NPQ8 | 21 |
| Q9NZN3 | 21 |
| P25686 | 21 |
| Q14195 | 21 |
| Q8N4C8 | 21 |
| Q9UL40 | 21 |
| Q99598 | 21 |
| Q15785 | 21 |
| O43156 | 21 |
| Q9Y2G8 | 21 |
| O94955 | 21 |
| Q7L3B6 | 21 |
| Q9H6U6 | 21 |
| Q92844 | 21 |
| Q9NUM4 | 21 |
| Q8WUX9 | 21 |
| Q9Y570 | 21 |
| O00501 | 21 |
| Q9UBP9 | 21 |
| O95340 | 21 |
| O95758 | 21 |
| O75167 | 21 |
| O00244 | 21 |
| Q9C0C2 | 21 |
| O75153 | 21 |
| O14558 | 21 |
| Q96151 | 21 |
| P54802 | 20 |
| Q9Y5Y5 | 20 |
| Q5TAX3 | 20 |
| Q86Y38 | 20 |
| Q01650 | 20 |
| Q9NX62 | 20 |
| Q9GZU1 | 20 |
| O00116 | 20 |
| O94766 | 20 |
| P06865 | 20 |
| Q96F63 | 20 |
| P0CG30 | 20 |
| Q16527 | 20 |
| Q8IW45 | 20 |
| Q14554 | 20 |
| Q8N5M4 | 20 |
| Q9BTZ2 | 20 |
| Q86TU7 | 20 |
| Q96IZ0 | 20 |
| Q9BYB4 | 20 |
| Q99653 | 20 |
| Q5TBB1 | 20 |
| Q9NV66 | 20 |
| Q8IXQ6 | 20 |
| Q9BPX6 | 20 |
| Q9H3P7 | 20 |
| P04003 | 20 |
| Q15126 | 20 |
| Q9HD26 | 20 |
| O96011 | 20 |
| O75607 | 20 |
| O00151 | 20 |
| Q7Z6M1 | 20 |
| Q9UHQ4 | 20 |

|        |    |
|--------|----|
| Q6ZVM7 | 20 |
| Q9Y6R4 | 20 |
| Q4G0P3 | 20 |
| Q8IXT5 | 20 |
| Q06136 | 20 |
| P13598 | 20 |
| P07108 | 20 |
| P56211 | 20 |
| Q08378 | 19 |
| Q8IW9  | 19 |
| Q9UHJ6 | 19 |
| Q9BRA2 | 19 |
| Q96DF8 | 19 |
| Q9Y6N5 | 19 |
| Q14CX7 | 19 |
| Q9Y4R8 | 19 |
| Q9NVA2 | 19 |
| P30626 | 19 |
| Q9BSJ8 | 19 |
| Q9H4A4 | 19 |
| Q9H3K6 | 19 |
| Q9NVH0 | 19 |
| Q9UL63 | 19 |
| O95365 | 19 |
| Q9UH17 | 19 |
| A6NDG6 | 19 |
| Q01167 | 19 |
| Q8NBJ7 | 19 |
| Q5SNT2 | 19 |
| Q9HD20 | 19 |
| Q8WUA4 | 19 |
| Q9UMX5 | 19 |
| Q99576 | 19 |
| Q9P2E9 | 19 |
| Q9HC07 | 19 |
| Q9NP66 | 19 |
| Q93063 | 19 |
| P16930 | 19 |
| P55061 | 19 |
| Q8N3P4 | 19 |
| Q92597 | 19 |
| Q9UPN7 | 19 |
| Q9H875 | 19 |
| Q96FX2 | 19 |
| Q9ULV3 | 19 |
| O95861 | 19 |
| Q9P2R3 | 19 |
| Q96HC4 | 19 |
| Q13795 | 19 |
| Q6VMQ6 | 19 |
| Q9NUG6 | 18 |
| O15270 | 18 |
| Q9UI14 | 18 |
| Q06432 | 18 |
| Q8NCA5 | 18 |
| Q8IZ52 | 18 |
| Q9P012 | 18 |
| Q9UBB4 | 18 |
| Q86X52 | 18 |
| P52848 | 18 |
| Q6P1Q9 | 18 |
| Q9BQ70 | 18 |
| P19827 | 18 |
| Q9NUP9 | 18 |
| O43150 | 18 |

|        |    |
|--------|----|
| Q9BT73 | 18 |
| Q9NX18 | 18 |
| Q86W92 | 18 |
| Q15025 | 18 |
| Q9Y605 | 18 |
| Q13045 | 18 |
| Q69YN2 | 18 |
| Q0VG06 | 18 |
| Q9UQ53 | 18 |
| Q14657 | 18 |
| Q9NW75 | 18 |
| Q16666 | 18 |
| P10746 | 18 |
| P17707 | 18 |
| Q92643 | 18 |
| Q96S44 | 18 |
| Q15814 | 18 |
| Q96T58 | 18 |
| O00273 | 18 |
| O00154 | 18 |
| P51808 | 18 |
| P58546 | 18 |
| P80297 | 18 |
| Q9P0J7 | 18 |
| Q9BSV6 | 18 |
| Q5RI15 | 18 |
| Q8WUP2 | 18 |
| Q9Y6D0 | 18 |
| Q96A26 | 18 |
| Q95674 | 18 |
| Q9P0K7 | 18 |
| P53677 | 18 |
| O75382 | 18 |
| Q96JB5 | 18 |
| Q8IW41 | 18 |
| Q4LDG9 | 18 |
| Q9NRB3 | 18 |
| Q96HS1 | 18 |
| Q96BA8 | 18 |
| Q8N488 | 18 |
| Q8TB24 | 17 |
| O43399 | 17 |
| P07197 | 17 |
| P38435 | 17 |
| Q86W50 | 17 |
| Q9BUM1 | 17 |
| Q9Y2D4 | 17 |
| Q6P1N9 | 17 |
| Q5HYK3 | 17 |
| Q8WUD4 | 17 |
| Q8N6L1 | 17 |
| Q9H2D1 | 17 |
| Q9BX67 | 17 |
| Q8NFA0 | 17 |
| P45877 | 17 |
| Q8IV38 | 17 |
| Q8N9N8 | 17 |
| Q96IZ6 | 17 |
| Q9BUB7 | 17 |
| Q9H9B4 | 17 |
| Q9Y2G3 | 17 |
| Q9H8Y5 | 17 |
| Q6IA69 | 17 |
| Q7LBC6 | 17 |
| Q8IY57 | 17 |



|        |    |
|--------|----|
| P85037 | 17 |
| Q92522 | 17 |
| Q5VZK9 | 17 |
| Q9NSY1 | 17 |
| Q86X95 | 17 |
| Q765P7 | 17 |
| Q8IXQ5 | 17 |
| Q96RL7 | 17 |
| Q9BYC5 | 17 |
| P78563 | 17 |
| Q15121 | 17 |
| Q9P2X0 | 17 |
| P46020 | 17 |
| Q03519 | 17 |
| Q9Y5Z9 | 17 |
| Q5T6F2 | 17 |
| Q99808 | 17 |
| Q3LXA3 | 17 |
| Q9UHB6 | 17 |
| O00187 | 17 |
| Q9BQE9 | 17 |
| Q9UKI8 | 17 |
| Q11201 | 17 |
| P53985 | 17 |
| O43520 | 17 |
| Q9Y5A7 | 17 |
| Q92551 | 17 |
| Q9H8M2 | 17 |
| P36021 | 17 |
| Q9UJ70 | 17 |
| P53814 | 17 |
| Q9BV86 | 17 |
| Q96AG4 | 16 |
| O00193 | 16 |
| Q99622 | 16 |
| Q5JSH3 | 16 |
| O15119 | 16 |
| Q9BZF1 | 16 |
| Q96GC9 | 16 |
| Q96DU7 | 16 |
| Q9H0X9 | 16 |
| Q9BSF4 | 16 |
| Q1KMD3 | 16 |
| Q9UMS6 | 16 |
| Q9P0P0 | 16 |
| Q02447 | 16 |
| Q13671 | 16 |
| Q6UWP7 | 16 |
| Q5VZL5 | 16 |
| Q9H0W9 | 16 |
| Q3V6T2 | 16 |
| Q9GZT4 | 16 |
| Q9Y2I1 | 16 |
| Q5JSZ5 | 16 |
| P29144 | 16 |
| Q92599 | 16 |
| Q12797 | 16 |
| Q9BVA0 | 16 |
| Q16585 | 16 |
| Q96QR8 | 16 |
| Q8TF68 | 16 |
| O14817 | 16 |
| Q14966 | 16 |
| Q96CM8 | 16 |
| Q8IY17 | 16 |

|               |    |
|---------------|----|
| Q9NXU5        | 16 |
| Q96QE5        | 16 |
| Q6NXR4        | 16 |
| P0CG12;P0CG13 | 16 |
| P68402        | 16 |
| Q9H334        | 16 |
| Q9H9L4        | 16 |
| Q9BV20        | 15 |
| Q9BQL6        | 15 |
| P43652        | 15 |
| Q9NWX6        | 15 |
| Q8NG68        | 15 |
| P22670        | 15 |
| Q96BY9        | 15 |
| Q02413        | 15 |
| Q9UEG4        | 15 |
| Q8N3X1        | 15 |
| O75915        | 15 |
| Q96QB1        | 15 |
| Q8WV99        | 15 |
| Q9UFC0        | 15 |
| O43854        | 15 |
| O14773        | 15 |
| Q7Z7K6        | 15 |
| O14828        | 15 |
| Q5SSJ5        | 15 |
| Q8N3D4        | 15 |
| Q9H4L5        | 15 |
| Q6PJF5        | 15 |
| Q02040        | 15 |
| Q96CG8        | 15 |
| P13056        | 15 |
| Q7Z7N9        | 15 |
| Q86WX3        | 15 |
| Q9H3Q1        | 15 |
| Q7LDG7        | 15 |
| P21397        | 15 |
| Q86XL3        | 15 |
| P42694        | 15 |
| Q6P1K2        | 15 |
| Q5VU43        | 15 |
| Q9H2G2        | 15 |
| O60447        | 15 |
| Q5T0F9        | 15 |
| Q5SXM8        | 15 |
| Q9NX46        | 15 |
| Q99504        | 15 |
| Q5T5P2        | 15 |
| P30825        | 15 |
| Q9Y6M1        | 15 |
| Q9Y4K0        | 15 |
| Q9P0S2        | 15 |
| Q5H9R7        | 15 |
| Q9NUY8        | 15 |
| P24468        | 15 |
| Q96FS4        | 15 |
| Q14764        | 15 |
| Q92544        | 15 |
| P30046        | 15 |
| Q9H2D6        | 15 |
| Q96HA7        | 15 |
| Q4J6C6        | 15 |
| Q08623        | 15 |
| P26572        | 15 |
| Q9NVX7        | 15 |

|        |    |
|--------|----|
| O43166 | 15 |
| O43715 | 15 |
| Q71RG4 | 15 |
| Q9NSC5 | 15 |
| Q96AB3 | 14 |
| Q15773 | 14 |
| Q9BQ24 | 14 |
| P48307 | 14 |
| P80108 | 14 |
| O75352 | 14 |
| Q9Y613 | 14 |
| Q96CW6 | 14 |
| Q6IQ49 | 14 |
| Q9NZI7 | 14 |
| Q9H8U3 | 14 |
| Q8N0Z3 | 14 |
| Q9HAD4 | 14 |
| Q9NQ92 | 14 |
| Q96EK4 | 14 |
| Q9BRZ2 | 14 |
| O95202 | 14 |
| Q96JG6 | 14 |
| Q96IK1 | 14 |
| Q8WXX0 | 14 |
| Q6P1N0 | 14 |
| Q9NRZ5 | 14 |
| Q9P2L0 | 14 |
| Q6VN20 | 14 |
| Q53GA4 | 14 |
| Q8N1G0 | 14 |
| Q659C4 | 14 |
| Q9H5K3 | 14 |
| Q6PID8 | 14 |
| Q86UU0 | 14 |
| Q8N8Q9 | 14 |
| Q9Y3M8 | 14 |
| Q8NBU5 | 14 |
| Q7Z3E2 | 14 |
| Q9UBQ6 | 14 |
| Q96C24 | 14 |
| Q01974 | 14 |
| Q13105 | 14 |
| Q86UY6 | 14 |
| O95197 | 14 |
| O43795 | 14 |
| Q9BQB6 | 14 |
| P49795 | 14 |
| Q9BRJ6 | 14 |
| Q8WWX9 | 14 |
| Q5JS54 | 14 |
| Q9Y241 | 14 |
| Q9BTE6 | 14 |
| Q8N556 | 14 |
| Q92636 | 14 |
| Q5H8A4 | 14 |
| Q8IWT0 | 14 |
| Q9H446 | 14 |
| Q9P003 | 14 |
| Q9Y2J4 | 14 |
| P15735 | 14 |
| O94916 | 14 |
| Q8WUH1 | 14 |
| O43314 | 14 |
| Q8IV63 | 14 |
| Q7Z589 | 14 |

|        |    |
|--------|----|
| Q9Y5X4 | 14 |
| Q9NRV9 | 13 |
| P37059 | 13 |
| O00115 | 13 |
| Q13287 | 13 |
| Q9H1E5 | 13 |
| Q9BX95 | 13 |
| Q9BX68 | 13 |
| Q9BT22 | 13 |
| Q9Y6X3 | 13 |
| Q969H8 | 13 |
| Q9HBE1 | 13 |
| Q9NZB2 | 13 |
| Q9UEE9 | 13 |
| Q96HP4 | 13 |
| O95571 | 13 |
| Q8NC56 | 13 |
| Q86Y56 | 13 |
| Q9BRS8 | 13 |
| P61457 | 13 |
| P78559 | 13 |
| Q9BW91 | 13 |
| Q15041 | 13 |
| Q9UK23 | 13 |
| Q8NF64 | 13 |
| P51580 | 13 |
| Q9BZ23 | 13 |
| Q66PJ3 | 13 |
| Q8IUI8 | 13 |
| Q96EY5 | 13 |
| O95625 | 13 |
| Q7L4I2 | 13 |
| Q13219 | 13 |
| Q86UE4 | 13 |
| O60704 | 13 |
| O15162 | 13 |
| Q9UEY8 | 13 |
| Q9H7N4 | 13 |
| Q9H993 | 13 |
| Q7LGA3 | 13 |
| Q9NTZ6 | 13 |
| P40425 | 13 |
| O95865 | 13 |
| Q99805 | 13 |
| Q9UKK3 | 13 |
| P51798 | 13 |
| Q8IZQ5 | 13 |
| Q9BRT3 | 13 |
| Q8NHU3 | 13 |
| Q9H1I8 | 13 |
| Q6DD88 | 13 |
| P57721 | 13 |
| Q86UA6 | 13 |
| Q9NXE4 | 13 |
| P15882 | 13 |
| Q9NS00 | 13 |
| Q8NAP3 | 13 |
| O75592 | 13 |
| Q86Y79 | 13 |
| Q8WUX1 | 13 |
| O60831 | 13 |
| Q2M389 | 13 |
| Q8N806 | 12 |
| Q9UKA4 | 12 |
| Q9BW66 | 12 |

|        |    |
|--------|----|
| Q96N67 | 12 |
| Q9BT67 | 12 |
| Q14696 | 12 |
| Q99856 | 12 |
| Q68CQ7 | 12 |
| Q9HA64 | 12 |
| O75319 | 12 |
| Q53GG5 | 12 |
| Q8WUU5 | 12 |
| P16152 | 12 |
| Q96C90 | 12 |
| P29972 | 12 |
| Q8WW59 | 12 |
| Q92882 | 12 |
| Q96C36 | 12 |
| Q8N357 | 12 |
| Q86WB0 | 12 |
| Q96H72 | 12 |
| Q8N699 | 12 |
| O14880 | 12 |
| Q9NU19 | 12 |
| Q9Y3P9 | 12 |
| Q9NVV0 | 12 |
| Q9Y3D2 | 12 |
| Q5T5Y3 | 12 |
| Q9Y2L9 | 12 |
| Q02338 | 12 |
| Q12805 | 12 |
| Q6P996 | 12 |
| Q9P0V9 | 12 |
| Q9BXI6 | 12 |
| Q9BQA9 | 12 |
| Q6NW29 | 12 |
| O60936 | 12 |
| P13489 | 12 |
| Q9BYX2 | 12 |
| Q7Z3E5 | 12 |
| Q7Z4V5 | 12 |
| Q15165 | 11 |
| Q8WU10 | 11 |
| Q16626 | 11 |
| P57105 | 11 |
| Q8N0Z6 | 11 |
| Q8NEH6 | 11 |
| Q6PD74 | 11 |
| Q0VDG4 | 11 |
| Q8N490 | 11 |
| O14613 | 11 |
| Q8IY45 | 11 |
| O94760 | 11 |
| O95159 | 11 |
| Q9NQS1 | 11 |
| Q6EMK4 | 11 |
| P51688 | 11 |
| O15014 | 11 |
| Q5PRF9 | 11 |
| Q63HR2 | 11 |
| Q9H1X3 | 11 |
| P49750 | 11 |
| Q8N5B7 | 11 |
| Q14728 | 11 |
| Q5UCC4 | 11 |
| Q9HCE3 | 11 |
| Q96JP5 | 11 |
| Q9BV44 | 11 |

|        |    |
|--------|----|
| Q5VW32 | 11 |
| Q12974 | 11 |
| Q8IWW6 | 11 |
| Q96PD5 | 11 |
| O43847 | 11 |
| Q6P4A7 | 11 |
| Q66K14 | 11 |
| Q9BRK5 | 11 |
| Q5SW79 | 11 |
| Q9NVF7 | 11 |
| Q9NWS8 | 11 |
| Q86SQ4 | 11 |
| Q9BRQ0 | 11 |
| Q8WWW3 | 11 |
| Q9HBK9 | 11 |
| O95685 | 11 |
| Q9HD45 | 11 |
| Q3YEC7 | 11 |
| O43286 | 11 |
| Q9H3K2 | 11 |
| Q8IVH2 | 11 |
| Q9Y4E1 | 11 |
| Q9Y2K2 | 11 |
| Q8N0Z8 | 11 |
| Q96FZ2 | 11 |
| Q9Y2H1 | 11 |
| Q8IYB1 | 11 |
| Q6ZUT1 | 11 |
| P07098 | 11 |
| O95870 | 11 |
| Q9Y259 | 11 |
| O94868 | 11 |
| P84101 | 11 |
| Q12765 | 11 |
| Q75N03 | 11 |
| Q9H6S1 | 11 |
| Q9ULL4 | 11 |
| Q96DX4 | 11 |
| Q92536 | 11 |
| Q9BXX5 | 11 |
| P40261 | 11 |
| Q5VT79 | 11 |
| Q9BXJ8 | 11 |
| Q9H5V9 | 11 |
| O75954 | 10 |
| Q01664 | 10 |
| Q8N3F8 | 10 |
| Q9H490 | 10 |
| Q8TCF1 | 10 |
| Q9HD47 | 10 |
| Q08AD1 | 10 |
| Q9H6V9 | 10 |
| P07311 | 10 |
| Q9P021 | 10 |
| Q14156 | 10 |
| Q08554 | 10 |
| Q9H013 | 10 |
| Q8IZ07 | 10 |
| O94923 | 10 |
| O75882 | 10 |
| O94887 | 10 |
| Q2M1Z3 | 10 |
| Q6ZXV5 | 10 |
| O60637 | 10 |
| O75891 | 10 |

|        |    |
|--------|----|
| P10915 | 10 |
| Q9NVT9 | 10 |
| P47974 | 10 |
| Q9HC24 | 10 |
| Q5T7W0 | 10 |
| Q8TBC3 | 10 |
| Q8NBL1 | 10 |
| Q9BUT1 | 10 |
| Q8TEU7 | 10 |
| Q16649 | 10 |
| P17026 | 10 |
| Q96JJ7 | 10 |
| Q92508 | 10 |
| Q9BUT9 | 10 |
| Q96F46 | 10 |
| Q96HD1 | 10 |
| Q8N680 | 10 |
| Q86X02 | 10 |
| Q8IWU5 | 10 |
| Q8WW01 | 10 |
| Q9P1F3 | 10 |
| Q96BR5 | 10 |
| Q8N5G2 | 10 |
| Q9Y5V3 | 10 |
| Q9Y657 | 10 |
| Q53HC9 | 10 |
| Q6GMV2 | 10 |
| Q92503 | 10 |
| Q9H2K8 | 10 |
| Q9P2B2 | 10 |
| Q9P2W1 | 10 |
| Q4G148 | 10 |
| Q8TDB4 | 10 |
| O00458 | 10 |
| Q96Q45 | 10 |
| P31944 | 10 |
| Q9Y6E2 | 10 |
| Q9BYI3 | 10 |
| Q8WUQ7 | 10 |
| Q7Z7K0 | 10 |
| Q9H2T7 | 10 |
| Q86YS7 | 10 |
| Q9Y4F1 | 10 |
| Q9BUD6 | 10 |
| O75695 | 9  |
| Q5EB52 | 9  |
| Q8NFW8 | 9  |
| P51397 | 9  |
| P43007 | 9  |
| O76080 | 9  |
| P49356 | 9  |
| Q9UH92 | 9  |
| Q8TD43 | 9  |
| Q6P2H3 | 9  |
| Q9Y5U9 | 9  |
| Q9Y616 | 9  |
| Q32NB8 | 9  |
| Q9HAT2 | 9  |
| Q9BV36 | 9  |
| Q01850 | 9  |
| Q63HQ0 | 9  |
| Q969N2 | 9  |
| P16591 | 9  |
| Q641Q2 | 9  |
| Q15155 | 9  |

|        |   |
|--------|---|
| Q9C0D3 | 9 |
| Q8WUX2 | 9 |
| Q6PI78 | 9 |
| Q9H0R4 | 9 |
| Q96MN2 | 9 |
| Q9H6H4 | 9 |
| P30408 | 9 |
| Q53T59 | 9 |
| Q9BVG9 | 9 |
| Q9BZF9 | 9 |
| Q8WXW3 | 9 |
| Q969J3 | 9 |
| Q99958 | 9 |
| Q3ZAQ7 | 9 |
| Q9NVH6 | 9 |
| Q6PJG6 | 9 |
| O15013 | 9 |
| Q96NE9 | 9 |
| Q96HY6 | 9 |
| Q9P2Q2 | 9 |
| Q15043 | 9 |
| O75157 | 9 |
| Q7Z5L9 | 9 |
| Q8NBP0 | 9 |
| Q9P0T7 | 9 |
| Q9UBH6 | 9 |
| Q86X27 | 9 |
| Q9UJF2 | 9 |
| Q9P215 | 9 |
| P78382 | 9 |
| Q9NTM9 | 9 |
| Q96E52 | 9 |
| Q70Z53 | 9 |
| O43414 | 9 |
| Q8IZ21 | 9 |
| Q9Y2H0 | 9 |
| Q9NRY2 | 9 |
| Q6UW63 | 9 |
| Q8N2K0 | 9 |
| Q96CX2 | 9 |
| Q9UHY8 | 9 |
| O95248 | 9 |
| Q8TEB9 | 9 |
| Q9BXB5 | 9 |
| Q96EV2 | 9 |
| Q9HCD6 | 9 |
| Q96LB3 | 9 |
| Q8N573 | 9 |
| O94929 | 9 |
| Q9NRR3 | 9 |
| P80303 | 9 |
| Q567V2 | 9 |
| Q9HAS0 | 9 |
| Q6BCY4 | 9 |
| Q8NDC0 | 9 |
| Q9P1Z9 | 9 |
| Q9BRQ8 | 9 |
| Q8NFJ5 | 8 |
| O75132 | 8 |
| O43281 | 8 |
| O14907 | 8 |
| Q9NQE9 | 8 |
| Q9UHY1 | 8 |
| Q9H1B7 | 8 |
| P49914 | 8 |



|        |   |
|--------|---|
| P20742 | 8 |
| O15321 | 8 |
| O75113 | 8 |
| Q6ICB0 | 8 |
| Q96DM3 | 8 |
| Q9NPI0 | 8 |
| Q9ULC0 | 8 |
| P49069 | 8 |
| Q9UKY1 | 8 |
| Q9NZH0 | 8 |
| Q8IU81 | 8 |
| Q9ULJ3 | 8 |
| Q9Y289 | 8 |
| Q9ULI3 | 8 |
| Q9H2C2 | 8 |
| Q9HAP2 | 8 |
| Q8N5U6 | 8 |
| Q8N5I4 | 8 |
| Q9NUJ3 | 8 |
| Q9GZU8 | 8 |
| O96005 | 8 |
| Q9BUV8 | 8 |
| Q9H7Z3 | 8 |
| Q86WR0 | 8 |
| Q92625 | 8 |
| P05204 | 8 |
| Q96FQ6 | 8 |
| O60636 | 8 |
| Q96NB2 | 8 |
| O75364 | 8 |
| Q8NEW0 | 8 |
| Q9NUN5 | 8 |
| Q13325 | 8 |
| O75368 | 8 |
| Q9Y2D5 | 8 |
| Q04941 | 8 |
| Q5EBL4 | 8 |
| Q5R3I4 | 8 |
| Q6ZTI6 | 8 |
| Q7Z2X4 | 8 |
| Q8N8E3 | 8 |
| Q9Y4F3 | 8 |
| Q7Z422 | 8 |
| Q8NHQ8 | 8 |
| O43813 | 8 |
| O75506 | 8 |
| Q9NWX4 | 8 |
| Q13443 | 8 |
| Q8IYQ7 | 8 |
| Q9NRY6 | 8 |
| Q8NEU8 | 8 |
| Q9BU23 | 8 |
| Q86UF1 | 8 |
| Q9HB09 | 8 |
| Q5T8D3 | 8 |
| Q8TCZ2 | 8 |
| Q8IY22 | 8 |
| P31270 | 7 |
| Q99952 | 7 |
| Q15035 | 7 |
| P18428 | 7 |
| P50548 | 7 |
| Q13829 | 7 |
| P43116 | 7 |
| Q9H0G5 | 7 |

|        |   |
|--------|---|
| P01591 | 7 |
| Q8IWT6 | 7 |
| Q8TCT8 | 7 |
| P31025 | 7 |
| O15127 | 7 |
| Q9NVM1 | 7 |
| Q96K49 | 7 |
| Q9Y2E5 | 7 |
| P57076 | 7 |
| Q9NWW4 | 7 |
| Q96AT1 | 7 |
| Q8N8Z6 | 7 |
| Q9Y3Q8 | 7 |
| Q96N21 | 7 |
| Q9NSY2 | 7 |
| O95747 | 7 |
| Q9H4I2 | 7 |
| Q96KA5 | 7 |
| Q9BZ67 | 7 |
| Q96PD2 | 7 |
| Q8IZ81 | 7 |
| Q8TD55 | 7 |
| Q7Z4I7 | 7 |
| Q9H0F7 | 7 |
| Q96B45 | 7 |
| Q7Z6K3 | 7 |
| O43427 | 7 |
| Q8IWY9 | 7 |
| Q4ZIN3 | 7 |
| Q9NX04 | 7 |
| Q9H1A3 | 7 |
| Q96JM3 | 7 |
| Q7L8J4 | 7 |
| Q96AQ6 | 7 |
| Q9NXN4 | 7 |
| Q5SWH9 | 7 |
| Q8N2G6 | 7 |
| Q9NZ63 | 7 |
| Q9P291 | 7 |
| Q9H6K1 | 7 |
| Q96GS4 | 7 |
| Q9Y2V2 | 7 |
| Q9UFW8 | 7 |
| Q9ULF5 | 7 |
| Q8N954 | 7 |
| Q15032 | 7 |
| Q9H7F0 | 7 |
| Q56VL3 | 7 |
| Q96K58 | 7 |
| Q8N5I9 | 7 |
| Q9H792 | 7 |
| Q9NPA3 | 7 |
| Q15651 | 7 |
| Q6SPF0 | 7 |
| Q6ZN55 | 7 |
| Q92954 | 7 |
| O60513 | 7 |
| Q14678 | 7 |
| Q8N653 | 6 |
| Q9Y3X0 | 6 |
| Q14331 | 6 |
| Q9C0H2 | 6 |
| Q9BT23 | 6 |
| Q9Y575 | 6 |
| Q96GY0 | 6 |

|        |   |
|--------|---|
| Q13433 | 6 |
| Q5HYI8 | 6 |
| Q6PH81 | 6 |
| Q6YHK3 | 6 |
| Q6NUM9 | 6 |
| Q9NQ48 | 6 |
| Q9BXB4 | 6 |
| Q9NSU2 | 6 |
| Q08AF3 | 6 |
| O95273 | 6 |
| Q9NXV2 | 6 |
| Q6GYQ0 | 6 |
| Q9H4I3 | 6 |
| Q9BXV9 | 6 |
| Q8TDP1 | 6 |
| Q9UL54 | 6 |
| Q14681 | 6 |
| Q8ND90 | 6 |
| Q49AR2 | 6 |
| Q9H7S9 | 6 |
| O14523 | 6 |
| Q7L1W4 | 6 |
| Q96G28 | 6 |
| Q9NW68 | 6 |
| A6NIH7 | 6 |
| Q96J42 | 6 |
| O43866 | 6 |
| P51858 | 6 |
| Q96SZ5 | 6 |
| O95866 | 6 |
| Q6UX71 | 6 |
| Q9C0I1 | 6 |
| Q5BJH2 | 6 |
| Q6XE24 | 6 |
| Q8WUN7 | 6 |
| Q99417 | 6 |
| Q96KN7 | 6 |
| Q14392 | 6 |
| Q96S99 | 6 |
| P0CW20 | 6 |
| Q8N5Z5 | 6 |
| Q5BJD5 | 6 |
| Q9P121 | 6 |
| Q5T749 | 6 |
| Q9NXV6 | 6 |
| P31641 | 6 |
| Q96B23 | 6 |
| Q8WZ82 | 6 |
| Q96AQ8 | 6 |
| Q9H0N5 | 6 |
| O95382 | 6 |
| Q9H977 | 5 |
| Q9UH36 | 5 |
| Q9UI42 | 5 |
| Q9BXX1 | 5 |
| Q14687 | 5 |
| Q9GZX9 | 5 |
| Q9H6Y7 | 5 |
| Q96F85 | 5 |
| Q96P63 | 5 |
| Q9H299 | 5 |
| Q96RW7 | 5 |
| Q99650 | 5 |
| Q9BXP2 | 5 |
| Q9Y5Q0 | 5 |

|        |   |
|--------|---|
| Q96HA8 | 5 |
| Q15018 | 5 |
| O60507 | 5 |
| Q12979 | 5 |
| Q9UBG0 | 5 |
| Q86VR2 | 5 |
| Q9NWQ9 | 5 |
| Q8IXS6 | 5 |
| Q96BS2 | 5 |
| Q13425 | 5 |
| Q6V1X1 | 5 |
| Q9NVQ4 | 5 |
| Q96BX8 | 5 |
| Q7Z6K5 | 5 |
| Q33E94 | 5 |
| Q96GE9 | 5 |
| Q96EK5 | 5 |
| Q9H0U9 | 5 |
| Q9BWH2 | 5 |
| Q5U3C3 | 5 |
| Q5T4B2 | 5 |
| Q495W5 | 5 |
| Q6ZSJ8 | 5 |
| Q3KQU3 | 5 |
| O95873 | 5 |
| Q53LP3 | 5 |
| Q9UJM3 | 5 |
| Q68DQ2 | 5 |
| O94967 | 5 |
| Q9UGM3 | 5 |
| Q7L775 | 5 |
| Q96GX2 | 5 |
| P20962 | 5 |
| Q14689 | 5 |
| Q86YW5 | 5 |
| Q8IUW5 | 5 |
| P63313 | 4 |
| Q53FA7 | 4 |
| Q9H910 | 4 |
| P17028 | 4 |
| P58215 | 4 |
| Q9H788 | 4 |
| Q92543 | 4 |
| Q9Y692 | 4 |
| Q96MX6 | 4 |
| Q96N64 | 4 |
| O43240 | 4 |
| Q1ZZU3 | 4 |
| Q8NAF0 | 4 |
| Q8NB37 | 4 |
| Q6GMV3 | 4 |
| Q8WY22 | 4 |
| Q6P9B6 | 4 |
| P84157 | 4 |
| Q5T750 | 4 |
| Q9Y4K1 | 4 |
| Q5T013 | 4 |
| Q96TA1 | 4 |
| Q9ULE0 | 4 |
| Q96CP2 | 4 |
| Q92618 | 4 |
| Q9UFG5 | 4 |
| O43861 | 4 |
| A6NFQ2 | 4 |
| Q2TAA2 | 4 |

|            |   |
|------------|---|
| Q6ZU80     | 4 |
| Q9HAU0     | 4 |
| O14683     | 4 |
| Q9Y6R7     | 4 |
| Q5JPE7     | 4 |
| Q96N06     | 4 |
| Q9NZS2     | 4 |
| Q9P1Z2     | 4 |
| Q9UFD9     | 4 |
| Q96EY8     | 4 |
| Q6PJW8     | 4 |
| Q9H8K7     | 4 |
| Q8N4A0     | 4 |
| Q12816     | 3 |
| Q92896     | 3 |
| O94964     | 3 |
| Q6P1R3     | 3 |
| Q9BT30     | 3 |
| Q9Y421     | 3 |
| Q8N612     | 3 |
| Q6PJ69     | 3 |
| Q96D15     | 3 |
| Q9H4A5     | 3 |
| Q8WUH6     | 3 |
| Q8N128     | 3 |
| Q9BUA3     | 3 |
| Q9Y2X9     | 3 |
| Q8NC42     | 3 |
| Q9H1E1     | 3 |
| Q9UPQ3     | 3 |
| Q6ICB4     | 3 |
| Q7Z4H8     | 3 |
| Q9H4E7     | 3 |
| Q96GZ6     | 3 |
| Q9BXW7     | 3 |
| Q68D10     | 3 |
| Q9UGR2     | 3 |
| Q8N999     | 3 |
| Q8IYL3     | 3 |
| Q9BZQ8     | 3 |
| P0CG08     | 3 |
| Q9UPW0     | 3 |
| Q3KRA9     | 3 |
| Q5VW36     | 3 |
| Q6ZUX7     | 3 |
| Q08188     | 3 |
| Q96CP6     | 3 |
| Q8N5G0     | 3 |
| O43665     | 3 |
| Q96SU4     | 3 |
| Q9Y4F5     | 3 |
| P0C7P0     | 3 |
| Q9HBH5     | 3 |
| A0A096LP01 | 3 |
| Q8N9M1     | 3 |
| Q8WWI5     | 3 |
| Q9C0F1     | 3 |
| Q9NUQ6     | 3 |
| Q3ZCW2     | 2 |
| Q9NUL5     | 2 |
| Q96M95     | 2 |
| Q8NCG7     | 2 |
| Q6P387     | 2 |
| Q9Y3E1     | 2 |
| Q6P4E1     | 2 |

|            |   |
|------------|---|
| Q8IY95     | 2 |
| Q75342     | 2 |
| Q9UH65     | 2 |
| Q69YQ0     | 2 |
| Q2TAM9     | 2 |
| P23610     | 2 |
| Q15170     | 2 |
| Q96KF7     | 2 |
| Q8NC44     | 2 |
| Q9H3H3     | 2 |
| A1XBS5     | 2 |
| C9JLW8     | 2 |
| Q587I9     | 2 |
| Q9P2C4     | 2 |
| Q8TCY9     | 2 |
| Q6NSJ5     | 2 |
| Q8TDW0     | 2 |
| Q9H3Y8     | 2 |
| Q9NQG1     | 2 |
| Q96AQ9     | 2 |
| Q96JG8     | 2 |
| Q8IXQ4     | 2 |
| Q5T0D9     | 2 |
| B2RUZ4     | 2 |
| Q86XA9     | 2 |
| Q86VE9     | 2 |
| Q9NQZ7     | 2 |
| P52943     | 2 |
| Q6UWH4     | 2 |
| Q9HAB3     | 2 |
| O43598     | 1 |
| Q86WR7     | 1 |
| Q05481     | 1 |
| P58317     | 1 |
| Q6PK18     | 1 |
| Q8N300     | 1 |
| Q9H019     | 1 |
| A6NDU8     | 1 |
| Q8WUR7     | 1 |
| P0CG35     | 1 |
| Q5VYJ5     | 1 |
| A0A0B4J1V0 | 1 |
| Q96DZ9     | 1 |
| Q6ZUT6     | 1 |
| Q8N5C1     | 1 |
| Q9C0A1     | 1 |
| Q96LW7     | 1 |
| Q9NY35     | 1 |
| Q9Y4C2     | 1 |
